# Supplementary material for: Umpolung trifluoromethylthiolation of alcohols
Source: Royal Society of Chemistry journal article supplement (doi:10.1039/d3ob01535a), 2023-01-01

## Supporting Information

### Trifluoromethylthiolation of Alcohols Using Triphenylphosphine and N-Trifluoromethylthiophthalimide

Ye Yang,<sup>a</sup> Jiemin Ma,<sup>a</sup> Jiaxiang Zhang,<sup>a</sup> Hu Cai<sup>\*a</sup> and Wentao Xu<sup>\*a</sup>

<sup>a</sup> *School of Chemistry and Chemical Engineering, Nanchang University, Nanchang, Jiangxi  
330031, China. Email: caihu@ncu.edu.cn; wtxu@ncu.edu.cn*

## Table of Contents

|                                                                   |     |
|-------------------------------------------------------------------|-----|
| 1. General information .....                                      | S3  |
| 2. Optimization of the trifluoromethylthiolation of alcohols..... | S3  |
| 3. General procedure .....                                        | S4  |
| 4. Investigation of the reaction mechanism .....                  | S5  |
| 5. Characterization of products .....                             | S7  |
| 6. Preparation of substrates .....                                | S16 |
| 7. NMR spectra of products .....                                  | S17 |

## 1. General information

All the reactions were conducted under air conditions unless otherwise noted. All solvents were obtained from commercial suppliers and used without further purification. Reagents were purchased from Energy Chemical, Bide pharma, and etc. Flash column chromatographic purification of products was accomplished using forced-flow chromatography on Silica Gel (300-400 mesh).

$^1\text{H}$  NMR,  $^{13}\text{C}$  NMR and  $^{19}\text{F}$  NMR spectra were recorded on a 400 MHz spectrometer in  $\text{CDCl}_3$  ( $\delta\text{H} = 0.0$  ppm,  $\delta\text{C} = 77.02$  ppm as standard). Data for  $^1\text{H}$  NMR are reported as follows: chemical shift (ppm, scale), multiplicity (s = singlet, d = doublet, t = triplet, q = quartet, m = multiplet, br = broad), coupling constant (Hz), and integration. Data for  $^{13}\text{C}$  NMR are reported in terms of chemical shift (ppm, scale), multiplicity, and coupling constant (Hz). High-resolution mass spectra were obtained by EI on a TOF mass analyzer. Mass spectra were obtained by EI on ISQ mass analyzer.

## 2. Optimizations of the reaction conditions

Table S1. Optimization of the Reaction Conditions<sup>a</sup>

| Entry | Variations from optimal conditions                   | Yield (%) <sup>b</sup> |
|-------|------------------------------------------------------|------------------------|
| 1     | none                                                 | 90 (85)                |
| 2     | Anhydrous DCE as solvent                             | 22                     |
| 3     | Anhydrous $\text{CH}_3\text{CN}$ as solvent          | 14                     |
| 4     | Anhydrous DMF as solvent                             | 44                     |
| 5     | THF as solvent                                       | 15                     |
| 6     | Suc- $\text{SCF}_3$ instead of Phth- $\text{SCF}_3$  | 38                     |
| 7     | Sacc- $\text{SCF}_3$ instead of Phth- $\text{SCF}_3$ | 24                     |
| 8     | Without $\text{Ph}_3\text{P}$                        | ND                     |
| 9     | Adding $\text{FeCl}_3$ (5 mol%)                      | 53                     |

<sup>a</sup>Reaction conditions: **1a** (0.1 mmol, 1.0 equiv), Phth- $\text{SCF}_3$  (0.15 mmol, 1.5 equiv),  $\text{PPh}_3$  (0.13 mmol, 1.3equiv), anhydrous THF (1.0 mL), rt, 0.5 h. <sup>b</sup>GC yield using the acetophenone as the internal standard. The number in parentheses is the isolated yield. ND = not detected.

Table S2. Optimization of organic phosphines<sup>a</sup>

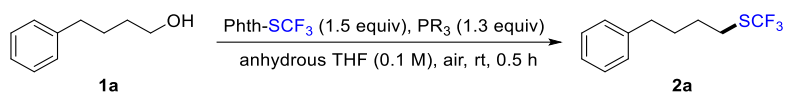

| Entry | PR <sub>3</sub>                                     | Yield (%) <sup>b</sup> |
|-------|-----------------------------------------------------|------------------------|
| 1     | PPh <sub>3</sub>                                    | 91                     |
| 2     | P(p-OMeC <sub>6</sub> H <sub>4</sub> ) <sub>3</sub> | 23                     |
| 3     | PPh <sub>2</sub> CH <sub>3</sub>                    | trace                  |
| 4     | P(OCH <sub>2</sub> CH <sub>3</sub> ) <sub>3</sub>   | trace                  |
| 5     | P( <sup>t</sup> Bu) <sub>3</sub>                    | 37                     |

<sup>a</sup>Reaction conditions: **1a** (0.1 mmol, 1.0 equiv), Phth-SCF<sub>3</sub> (0.15 mmol, 1.5 equiv), PR<sub>3</sub> (0.13 mmol, 1.3equiv), anhydrous THF (1.0 mL), rt, 0.5 h. <sup>b</sup>GC yield using the acetophenone as the internal standard.

Table S3. The screen of the amounts of reactants.

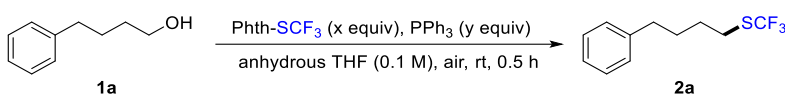

| Entry | x   | y   | Yield (%) <sup>b</sup> |
|-------|-----|-----|------------------------|
| 1     | 1.3 | 1.3 | 72%                    |
| 2     | 1.5 | 1.3 | 89%                    |
| 3     | 1.3 | 1.5 | 71%                    |

<sup>a</sup>Reaction conditions: **1a** (0.1 mmol, 1.0 equiv), Phth-SCF<sub>3</sub> (x equiv), PPh<sub>3</sub> (y equiv), anhydrous THF (1.0 mL), rt, 0.5 h. <sup>b</sup>GC yield using the acetophenone as the internal standard.

### 3. General procedure for trifluoromethylthiolation of alcohols

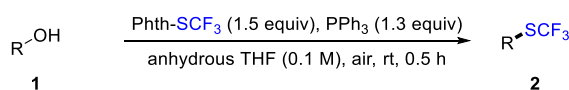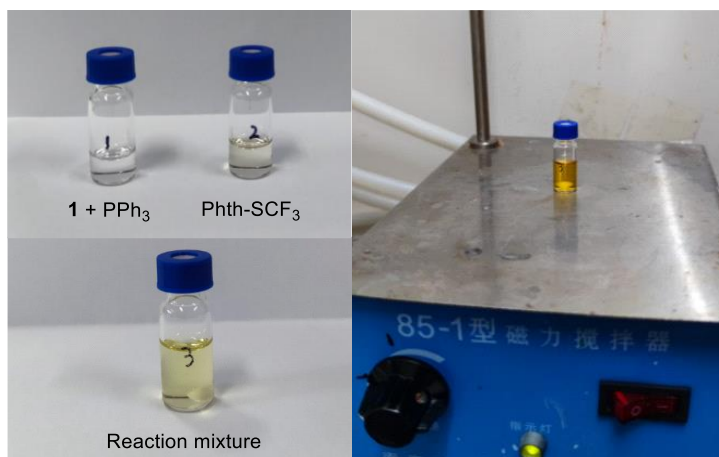

Three dried 2.0 mL resealable screw-capped vials were prepared. Alcohol (1.0 equiv, 0.1 mmol), triphenylphosphine (PPh<sub>3</sub>, 1.3 equiv, 0.13 mmol, 34.1 mg) were placed in vial **1**. The solvent anhydrous tetrahydrofuran (THF, 0.5 mL) was added under air conditions. *N*-(trifluoromethylthio)phthalimide (Phth-SCF<sub>3</sub>, 1.5 equiv, 0.15 mmol, 37.1 mg) and anhydrous tetrahydrofuran (THF, 0.5 mL) were added to vial **2**. The reaction mixtures in vial **1** and vial **2** were transferred in sequence to vial **3** with a Teflon-coated stir bar under air. The final reaction mixtures were stirred at room temperature for 30 minutes. When the reaction finished, the solvent was evaporated under reduced pressure and purified by flash column chromatography using a solvent mixture (ethyl acetate/petroleum ether) as an eluent to afford the purified product.

#### 4. Investigation of the reaction mechanism

##### 4.1 <sup>18</sup>O-labelled experiment

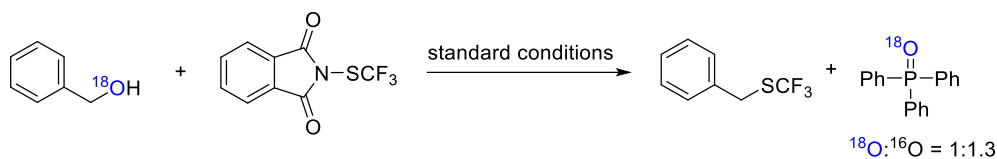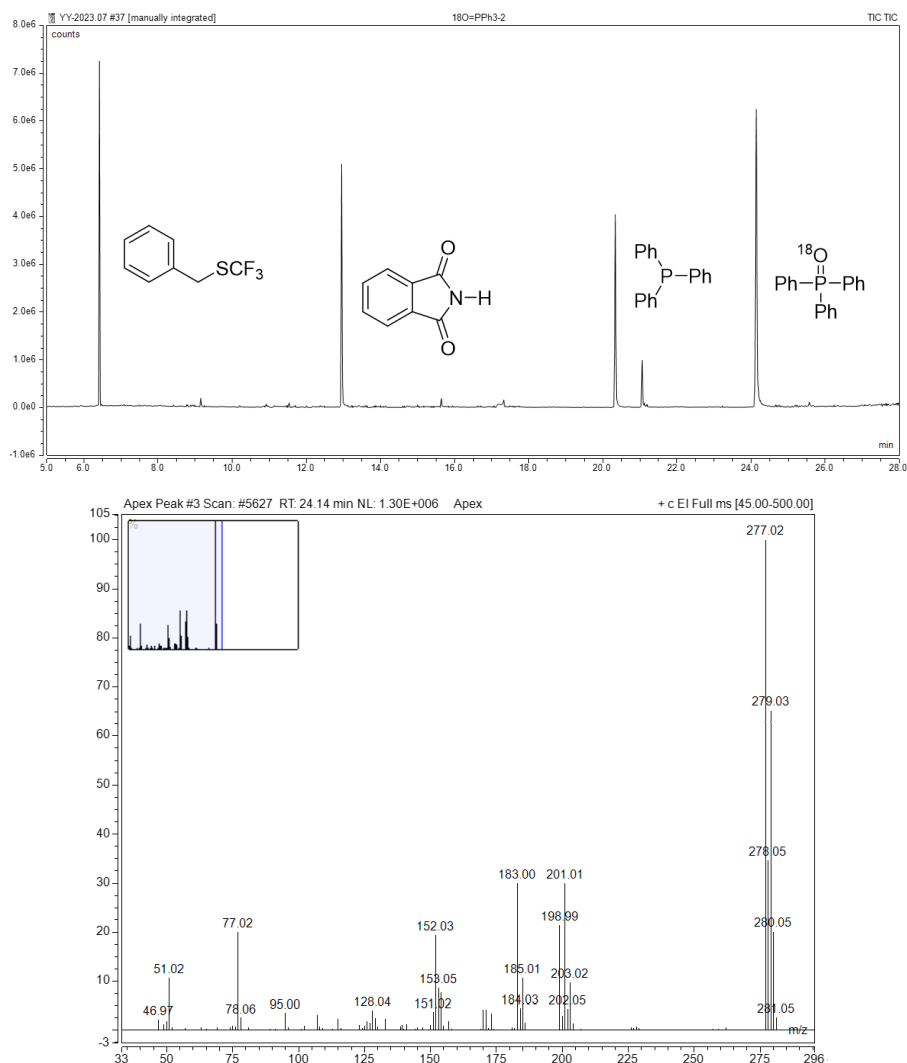

Fig. S1 The TIC spectrogram and MS spectrogram of the reaction mixture.

This  $^{18}\text{O}$ -labelled experiment suggested that  $\text{PPh}_3$  was responsible for the deoxygenation. However,  $^{16}\text{O}=\text{PPh}_3$  was detected. The  $^{16}\text{O}$  atoms probably originate from  $\text{H}_2^{16}\text{O}$ . When 3.0 equiv of  $\text{H}_2^{18}\text{O}$  was added in anhydrous THF, trifluoromethylthiophosphonium ion was directly hydrolyzed, giving  $^{18}\text{O}=\text{PPh}_3$  (eq 1). In addition, there's no isotope exchange (eq 2). These results further demonstrated that  $\text{H}_2\text{O}$  could quench the reaction, delivering  $\text{O}=\text{PPh}_3$ .

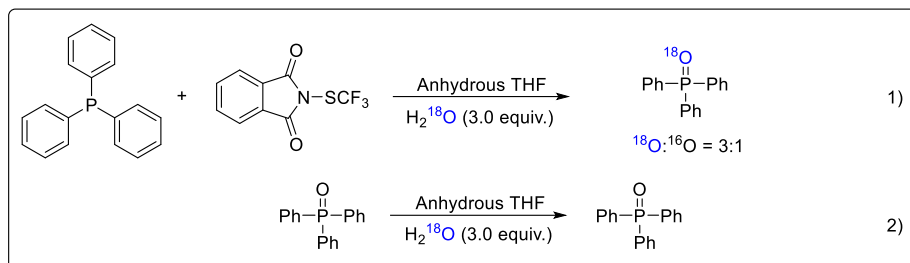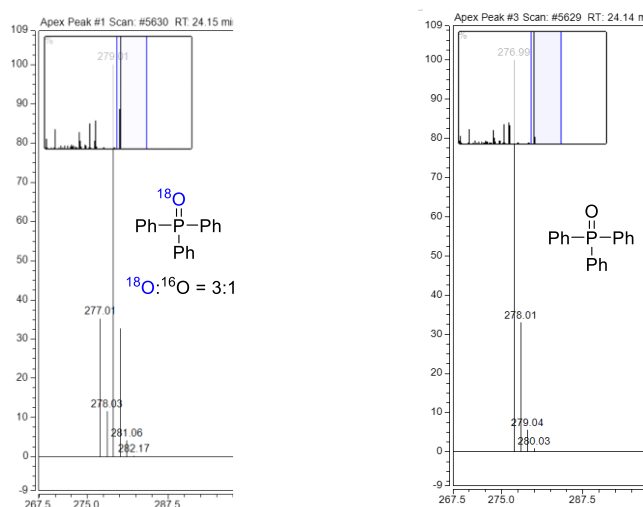

Preparation of  $^{18}\text{O}$ -labelled benzylic alcohol (Ref. A. Yadav, M. D. Ambule, R. Kant and A. K. Srivastava, *Eur. J. Org. Chem.*, 2020, **2020**, 5709-5713.)

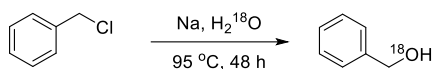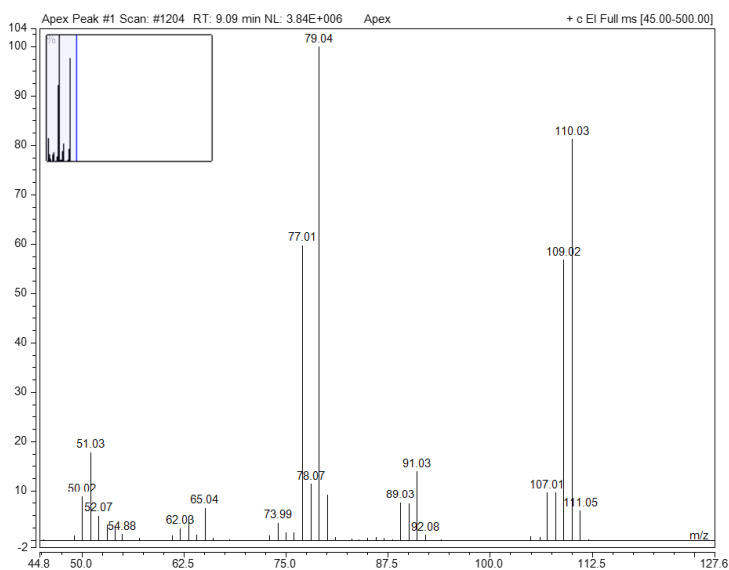

Fig. S2 The MS spectrogram of  $^{18}\text{O}$ -labelled benzylic alcohol.

## 4.2 $^{31}\text{P}$ NMR study of reaction

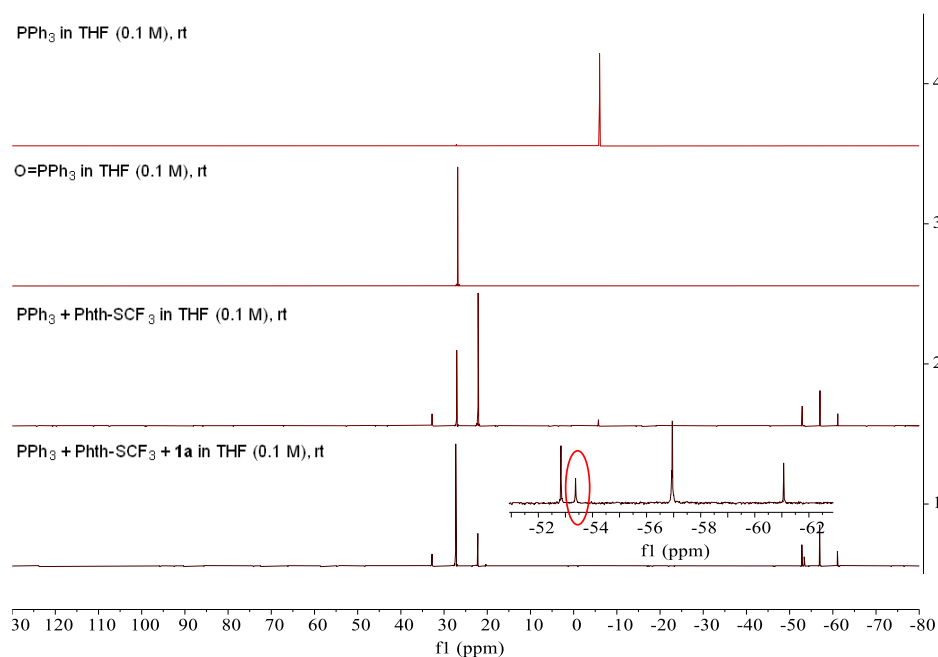

A simple  $^{31}\text{P}$  NMR study of reaction mixture was conducted to clarify the different P species. When mixing  $\text{PPh}_3$  and  $\text{Phth-SCF}_3$  in THF, we are surprised to find that is formed ( $\delta = 27.07$  ppm). This result could also explain why the  $^{16}\text{O}$ -triphenylphosphorus oxide was produced when using  $^{18}\text{O}$ -benzylic alcohol. The peak at 22.12 ppm can be assigned to trifluoromethylthiophosphonium **III**. Under the standard conditions, two new signals were detected at  $\delta = 20.36$ , and  $-53.38$  ppm. A peak at  $-53.38$  ppm could be assigned to the intermediate **IV** and the other may be assigned to the intermediate **V**.

## 5. Characterization of products

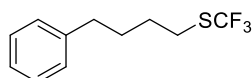

*(4-phenylbutyl)(trifluoromethyl)sulfane (2a)* According to the general procedure in 0.1 mmol scale using 1.5 equiv  $\text{Phth-SCF}_3$  reagent and 1.3 equiv  $\text{PPh}_3$  reagent with reaction time of 0.5 h, 20.3 mg, 85%, purified by flash chromatography, yellow oil;  $R_f = 0.5$  (petroleum ether);  $^1\text{H}$  NMR (400 MHz, Chloroform-*d*)  $\delta$  7.28 (t,  $J = 7.3$  Hz, 2H), 7.23 – 7.13 (m, 3H), 2.88 (t,  $J = 5.5$  Hz, 2H), 2.64 (t,  $J = 4.9$  Hz, 2H), 1.78 – 1.67 (m, 4H);  $^{19}\text{F}$  NMR (376 MHz, Chloroform-*d*)  $\delta$  -41.59; GCMS (EI)  $m/z$  233 ( $\text{M}$ ) $^+$ .

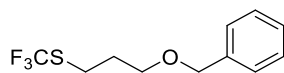

*(3-(benzyloxy)propyl)(trifluoromethyl)sulfane (2b)* According to the general procedure in 0.1 mmol scale using 1.5 equiv  $\text{Phth-SCF}_3$  reagent and 1.3 equiv  $\text{PPh}_3$  reagent with reaction time of 0.5 h, 17.8 mg, 71%, purified by flash chromatography, yellow oil;  $R_f = 0.6$  (petroleum ether/ethylacetate 20:1);  $^1\text{H}$  NMR (400 MHz, Chloroform-*d*)  $\delta$  7.38 – 7.28 (m, 5H), 4.50 (s, 2H), 3.57 (t,  $J = 5.8$  Hz, 2H), 3.01 (t,  $J = 7.2$  Hz, 2H), 1.99 (p,  $J = 6.5$  Hz, 2H);  $^{19}\text{F}$  NMR (376 MHz, Chloroform-*d*)  $\delta$  -41.81; GCMS (EI)  $m/z$  250 ( $\text{M}$ ) $^+$ .

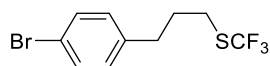

(3-(4-bromophenyl)propyl)(trifluoromethyl)sulfane (**2c**) According to the general procedure in 0.1 mmol scale using 1.5 equiv Phth-SCF<sub>3</sub> reagent and 1.3 equiv PPh<sub>3</sub> reagent with reaction time of 0.5 h, 22.8 mg, 78%, purified by flash chromatography, yellow oil; R<sub>f</sub> = 0.8 (petroleum ether/ethylacetate 50:1); <sup>1</sup>H NMR (400 MHz, Chloroform-*d*) δ 7.41 (d, *J* = 8.2 Hz, 2H), 7.05 (d, *J* = 6.8 Hz, 2H), 2.86 (t, *J* = 6.7 Hz, 2H), 2.69 (t, *J* = 7.1 Hz, 2H), 2.00 (p, *J* = 7.1, 6.6 Hz, 2H); <sup>19</sup>F NMR (376 MHz, Chloroform-*d*) δ -41.0; <sup>13</sup>C NMR (101 MHz, Chloroform-*d*) δ 139.4, 131.6, 131.1 (q, *J* = 308.4 Hz), 130.2, 120.1, 33.7, 30.8, 29.1 (q, *J* = 2.0 Hz); HRMS (EI) calcd for C<sub>10</sub>H<sub>10</sub>BrF<sub>3</sub>S (M<sup>+</sup>): 297.9633, found 297.9639.

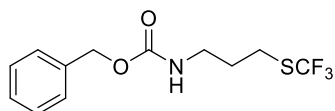

benzyl (3-((trifluoromethyl)thio)propyl)carbamate (**2d**) According to the general procedure in 0.1 mmol scale using 1.5 equiv Phth-SCF<sub>3</sub> reagent and 1.3 equiv PPh<sub>3</sub> reagent with reaction time of 0.5 h, 22.9 mg, 78%, purified by flash chromatography, white solid; R<sub>f</sub> = 0.5 (petroleum ether/ethylacetate 5:1); <sup>1</sup>H NMR (400 MHz, Chloroform-*d*) δ 7.41 – 7.28 (m, 5H), 5.10 (s, 2H), 4.90 (s, 1H), 3.40 – 3.21 (m, 2H), 3.01 – 2.82 (m, 2H), 2.01 – 1.81 (m, 2H); <sup>19</sup>F NMR (376 MHz, Chloroform-*d*) δ -41.19; GCMS (EI) m/z 292 (M)<sup>+</sup>.

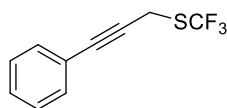

(3-phenylprop-2-yn-1-yl)(trifluoromethyl)sulfane (**2e**) According to the general procedure in 0.1 mmol scale using 1.5 equiv Phth-SCF<sub>3</sub> reagent and 1.3 equiv PPh<sub>3</sub> reagent with reaction time of 0.5 h, 15.4 mg, 70%, purified by flash chromatography, yellow oil; R<sub>f</sub> = 0.6 (petroleum ether); <sup>1</sup>H NMR (400 MHz, Chloroform-*d*) δ 7.43 (d, *J* = 7.2 Hz, 2H), 7.35 – 7.28 (m, 3H), 3.89 (s, 2H); <sup>19</sup>F NMR (376 MHz, Chloroform-*d*) δ -41.9; <sup>13</sup>C NMR (101 MHz, Chloroform-*d*) δ 131.8, 130.4 (q, *J* = 308.7), 128.7, 128.3, 122.3, 84.6, 82.2, 19.5 (q, *J* = 3.4 Hz). HRMS (EI) calcd for C<sub>10</sub>H<sub>7</sub>F<sub>3</sub>S (M<sup>+</sup>): 216.0215, found 216.0216.

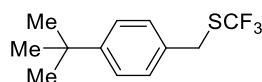

(4-(tert-butyl)benzyl)(trifluoromethyl)sulfane (**2f**) According to the general procedure in 0.1 mmol scale using 1.5 equiv Phth-SCF<sub>3</sub> reagent and 1.3 equiv PPh<sub>3</sub> reagent with reaction time of 0.5 h, 18.1 mg, 72%, purified by flash chromatography, colorless solid; R<sub>f</sub> = 0.6 (petroleum ether); <sup>1</sup>H NMR (400 MHz, Chloroform-*d*) δ 7.36 (d, *J* = 8.3 Hz, 2H), 7.26 (d, *J* = 8.3 Hz, 2H), 4.10 (s, 2H), 1.31 (s, 9H); <sup>19</sup>F NMR (376 MHz, Chloroform-*d*) δ -41.26; GCMS (EI) m/z 248 (M)<sup>+</sup>.

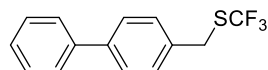



([1,1'-biphenyl]-4-ylmethyl)(trifluoromethyl)sulfane (**2g**) According to the general procedure in 0.1 mmol scale using 1.5 equiv Phth-SCF<sub>3</sub> reagent and 1.3 equiv Ph<sub>3</sub>P reagent with reaction time of 0.5 h, 15.4 mg, 67%, purified by flash chromatography, yellow solid; R<sub>f</sub> = 0.5 (petroleum ether); <sup>1</sup>H NMR (400 MHz, Chloroform-*d*) δ 7.58 (ddt, *J* = 8.2, 5.8, 2.4 Hz, 4H), 7.47 – 7.41 (m, 3H), 7.41 – 7.32 (m, 2H), 4.17 (s, 2H); <sup>19</sup>F NMR (376 MHz, Chloroform-*d*) δ -41.04; GCMS (EI) *m/z* 267 (M)<sup>+</sup>.

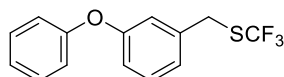

(3-phenoxybenzyl)(trifluoromethyl)sulfane (**2h**) According to the general procedure in 0.1 mmol scale using 1.5 equiv Phth-SCF<sub>3</sub> reagent and 1.3 equiv PPh<sub>3</sub> reagent with reaction time of 0.5 h, 19.3 mg, 68%, purified by flash chromatography, yellow oil; R<sub>f</sub> = 0.5 (petroleum ether); <sup>1</sup>H NMR (400 MHz, Chloroform-*d*) δ 7.37 – 7.32 (m, 2H), 7.29 (t, *J* = 7.9 Hz, 1H), 7.12 (t, *J* = 7.4 Hz, 1H), 7.06 (d, *J* = 7.6 Hz, 1H), 7.01 (s, 1H), 7.00 – 6.98 (m, 2H), 6.93 (d, *J* = 8.2 Hz, 1H), 4.06 (s, 2H); <sup>19</sup>F NMR (376 MHz, Chloroform-*d*) δ -41.6; <sup>13</sup>C NMR (101 MHz, Chloroform-*d*) δ 157.7, 156.8, 137.0, 130.5 (q, *J* = 308.4 Hz), 130.2, 129.8, 123.6, 123.6, 119.1, 119.1, 118.2, 34.0 (q, *J* = 2.4 Hz). HRMS (EI) caclcd for C<sub>14</sub>H<sub>11</sub>F<sub>3</sub>OS (M<sup>+</sup>): 284.0477, found 284.0482.

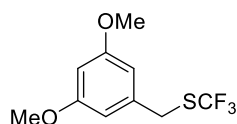

(3,5-dimethoxybenzyl)(trifluoromethyl)sulfane (**2i**) According to the general procedure in 0.1 mmol scale using 1.5 equiv Phth-SCF<sub>3</sub> reagent and 1.3 equiv PPh<sub>3</sub> reagent with reaction time of 0.5 h, 17.1 mg, 68%, purified by flash chromatography, yellow oil; R<sub>f</sub> = 0.3 (petroleum ether/ethylacetate 100:1); <sup>1</sup>H NMR (400 MHz, Chloroform-*d*) δ 6.48 (d, *J* = 2.0 Hz, 2H), 6.39 (t, *J* = 2.0 Hz, 1H), 4.05 (s, 2H), 3.79 (s, 6H); <sup>19</sup>F NMR (376 MHz, Chloroform-*d*) δ -40.91; GCMS (EI) *m/z* 251 (M)<sup>+</sup>.

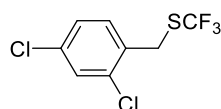

(2,4-dichlorobenzyl)(trifluoromethyl)sulfane (**2j**) According to the general procedure in 0.1 mmol scale using 1.5 equiv Phth-SCF<sub>3</sub> reagent and 1.3 equiv Ph<sub>3</sub>P reagent with reaction time of 0.5 h, 18.5 mg, 71%, purified by flash chromatography, yellow oil; R<sub>f</sub> = 0.7 (petroleum ether/ethylacetate 20:1); <sup>1</sup>H NMR (400 MHz, Chloroform-*d*) δ 7.43 (d, *J* = 1.7 Hz, 1H), 7.32 (d, *J* = 8.3 Hz, 1H), 7.25 – 7.22 (m, 1H), 4.17 (s, 2H); <sup>19</sup>F NMR (376 MHz, Chloroform-*d*) δ -41.4; <sup>13</sup>C NMR (101 MHz, Chloroform-*d*) δ 134.9, 134.8, 131.6, 131.3, 130.7 (q, *J* = 308.7 Hz), 129.8, 127.5, 31.5 (q, *J* = 2.5 Hz). HRMS (EI) caclcd for C<sub>8</sub>H<sub>5</sub>Cl<sub>2</sub>F<sub>3</sub>S (M<sup>+</sup>): 259.9436, found 259.9445.

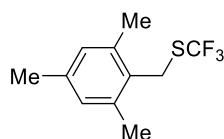

(trifluoromethyl)(2,4,6-trimethylbenzyl)sulfane (**2k**) According to the general procedure in 0.1 mmol scale using 1.5 equiv Phth-SCF<sub>3</sub> reagent and 1.3 equiv PPh<sub>3</sub> reagent with reaction time of 0.5

h, 18.9 mg, 80%, purified by flash chromatography, yellow oil; Rf = 0.7 (petroleum ether); <sup>1</sup>H NMR (400 MHz, Chloroform-*d*) δ 6.86 (s, 2H), 4.19 (s, 2H), 2.38 (s, 6H), 2.26 (s, 3H); <sup>19</sup>F NMR (376 MHz, Chloroform-*d*) δ -40.97; GCMS (EI) m/z 233 (M)<sup>+</sup>.

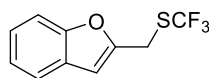

2-(((trifluoromethyl)thio)methyl)benzofuran (**2l**) According to the general procedure in 0.1 mmol scale using 1.5 equiv Phth-SCF<sub>3</sub> reagent and 1.3 equiv PPh<sub>3</sub> reagent with reaction time of 0.5 h, 13.1 mg, 57%, purified by flash chromatography, yellow oil; Rf = 0.5 (petroleum ether/ethylacetate 50:1); <sup>1</sup>H NMR (400 MHz, Chloroform-*d*) δ 7.53 (d, *J* = 7.6 Hz, 1H), 7.46 (d, *J* = 8.2 Hz, 1H), 7.29 (t, *J* = 7.7 Hz, 1H), 7.23 (t, *J* = 7.4 Hz, 1H), 6.68 (s, 1H), 4.25 (s, 2H); <sup>19</sup>F NMR (376 MHz, Chloroform-*d*) δ -41.6; <sup>13</sup>C NMR (101 MHz, Chloroform-*d*) δ 155.2, 151.4, 130.4 (q, *J* = 308.1 Hz) 128.1, 124.7, 123.1, 121.0, 111.2, 105.7, 27.1 (q, *J* = 2.9 Hz). HRMS (EI) caclcd for C<sub>10</sub>H<sub>7</sub>F<sub>3</sub>OS (M<sup>+</sup>): 232.0164, found 232.0173.

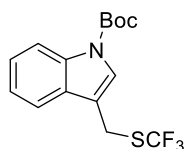

tert-butyl 3-(((trifluoromethyl)thio)methyl)-1H-indole-1-carboxylate (**2m**) According to the general procedure in 0.1 mmol scale using 1.5 equiv Phth-SCF<sub>3</sub> reagent and 1.3 equiv Ph<sub>3</sub>P reagent with reaction time of 0.5 h, 26.3 mg, 79%, purified by flash chromatography, yellow solid; Rf = 0.6 (petroleum ether/ethylacetate 50:1); <sup>1</sup>H NMR (400 MHz, Chloroform-*d*) δ 8.14 (d, *J* = 8.1 Hz, 1H), 7.59 (d, *J* = 7.1 Hz, 2H), 7.35 (t, *J* = 7.7 Hz, 1H), 7.28 (t, *J* = 7.5 Hz, 1H), 4.27 (s, 2H), 1.67 (s, 9H); <sup>19</sup>F NMR (376 MHz, Chloroform-*d*) δ -41.8; <sup>13</sup>C NMR (101 MHz, Chloroform-*d*) δ 149.4, 135.6, 130.7 (q, *J* = 308.4 Hz), 128.9, 125.0, 125.0, 122.8, 118.9, 115.5, 113.8, 84.1, 28.2, 24.9 (q, *J* = 2.8 Hz). HRMS (EI) caclcd for C<sub>15</sub>H<sub>16</sub>F<sub>3</sub>NO<sub>2</sub>S (M<sup>+</sup>): 331.0848, found 331.0860.

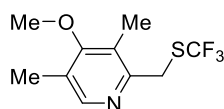

4-methoxy-3,5-dimethyl-2-(((trifluoromethyl)thio)methyl)pyridine (**2n**) According to the general procedure in 0.1 mmol scale using 1.5 equiv Phth-SCF<sub>3</sub> reagent and 1.3 equiv Ph<sub>3</sub>P reagent with reaction time of 0.5 h, 9.55 mg, 48%, purified by flash chromatography, yellow solid; Rf = 0.3 (petroleum ether/ethylacetate 20:1); <sup>1</sup>H NMR (400 MHz, Chloroform-*d*) δ 8.19 (s, 1H), 4.29 (s, 2H), 3.77 (s, 3H), 2.28 (s, 3H), 2.25 (s, 3H); <sup>19</sup>F NMR (376 MHz, Chloroform-*d*) δ -41.32; GCMS (EI) m/z 250 (M)<sup>+</sup>.

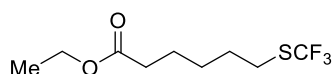

ethyl 6-(((trifluoromethyl)thio)hexanoate (**2o**) According to the general procedure in 0.1 mmol scale using 1.5 equiv Phth-SCF<sub>3</sub> reagent and 1.3 equiv Ph<sub>3</sub>P reagent with reaction time of 0.5 h, 17.8 mg, 73%, purified by flash chromatography, colorless oil; Rf = 0.6 (petroleum ether/ethylacetate 20:1); <sup>1</sup>H NMR (400 MHz, Chloroform-*d*) δ 4.13 (q, *J* = 7.1 Hz, 2H), 2.88 (t, *J* = 7.4 Hz, 2H), 2.31 (t, *J* =

7.4 Hz, 2H), 1.73 (dd,  $J = 15.2, 7.7$  Hz, 2H), 1.67 – 1.59 (m, 2H), 1.49 – 1.42 (m, 2H), 1.28 (d,  $J = 3.8$  Hz, 3H);  $^{19}\text{F}$  NMR (376 MHz, Chloroform- $d$ )  $\delta$  -41.24; GCMS (EI)  $m/z$  243 (M) $^+$ .

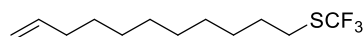

(trifluoromethyl)(undec-10-en-1-yl)sulfane (**2p**) According to the general procedure in 0.1 mmol scale using 1.5 equiv Phth-SCF<sub>3</sub> reagent and 1.3 equiv Ph<sub>3</sub>P reagent with reaction time of 0.5 h, 37.4 mg, 75%, purified by flash chromatography, colorless oil;  $^1\text{H}$  NMR (400 MHz, Chloroform- $d$ )  $\delta$  5.81 (ddt,  $J = 16.9, 10.1, 6.7$  Hz, 1H), 5.03 – 4.89 (m, 2H), 2.87 (t,  $J = 7.4$  Hz, 1H), 2.04 (q,  $J = 7.0$  Hz, 2H), 1.85 – 1.76 (m, 1H), 1.68 (p,  $J = 7.4$  Hz, 2H), 1.43 – 1.27 (m, 12H);  $^{19}\text{F}$  NMR (376 MHz, Chloroform- $d$ )  $\delta$  -41.59.

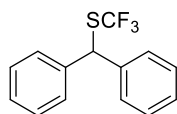

benzhydryl(trifluoromethyl)sulfane (**2q**) According to the general procedure in 0.1 mmol scale using 1.5 equiv Phth-SCF<sub>3</sub> reagent and 1.3 equiv Ph<sub>3</sub>P reagent with reaction time of 1 h, 16.6 mg, 59%, purified by flash chromatography, colorless oil;  $R_f = 0.8$  (petroleum ether);  $^1\text{H}$  NMR (400 MHz, Chloroform- $d$ )  $\delta$  7.40 (d,  $J = 7.5$  Hz, 4H), 7.34 (t,  $J = 7.4$  Hz, 4H), 7.27 (t,  $J = 7.2$  Hz, 2H), 5.69 (s, 1H);  $^{19}\text{F}$  NMR (376 MHz, Chloroform- $d$ )  $\delta$  -41.36; GCMS (EI)  $m/z$  268 (M) $^+$ .

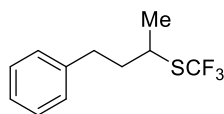

(4-phenylbutan-2-yl)(trifluoromethyl)sulfane (**2r**) According to the general procedure in 0.1 mmol scale using 1.5 equiv Phth-SCF<sub>3</sub> reagent and 1.3 equiv Ph<sub>3</sub>P reagent with reaction time of 1 h, 25.4 mg, 55%, purified by flash chromatography, colorless oil,  $^1\text{H}$  NMR (400 MHz, Chloroform- $d$ )  $\delta$  7.29 (t,  $J = 7.4$  Hz, 2H), 7.20 (dd,  $J = 11.2, 7.2$  Hz, 3H), 3.30 (h,  $J = 6.8$  Hz, 1H), 2.75 (t,  $J = 7.9$  Hz, 2H), 1.95 (dh,  $J = 14.6, 7.3$  Hz, 2H), 1.46 (d,  $J = 6.8$  Hz, 3H);  $^{19}\text{F}$  NMR (376 MHz, Chloroform- $d$ )  $\delta$  -41.28; GCMS (EI)  $m/z$  234 (M) $^+$ .

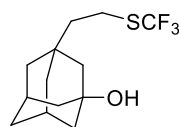

(1s,3r,5R,7S)-3-(2-((trifluoromethyl)thio)ethyl)adamantan-1-ol (**3a**) According to the general procedure in 0.1 mmol scale using 1.5 equiv Phth-SCF<sub>3</sub> reagent and 1.3 equiv Ph<sub>3</sub>P reagent with reaction time of 0.5 h, 12.3 mg, 44%, purified by flash chromatography, yellow oil;  $R_f = 0.4$  (petroleum ether/ethylacetate 5:1);  $^1\text{H}$  NMR (400 MHz, Chloroform- $d$ )  $\delta$  4.12 (q,  $J = 7.1$  Hz, 2H), 3.48 (s, 1H), 2.89 – 2.79 (m, 1H), 2.05 (s, 3H), 1.67 (q,  $J = 11.7, 11.2$  Hz, 3H), 1.60 – 1.51 (m, 2H), 1.48 – 1.40 (m, 3H), 1.26 (t,  $J = 7.1$  Hz, 4H).  $^{13}\text{C}$  NMR (101 MHz, Chloroform- $d$ )  $\delta$  131.0 (q,  $J = 307.0$  Hz) 68.7, 60.4, 49.4, 44.6, 42.8, 40.5, 36.4, 35.3, 30.5, 24.3, 21.0, 14.1.  $^{19}\text{F}$  NMR (376 MHz, Chloroform- $d$ )  $\delta$  -41.4; HRMS (ESI)  $\text{caclcd}$  for C<sub>13</sub>H<sub>19</sub>F<sub>3</sub>NaOS $^+$  (M+Na) $^+$ : 303.1001, found 303.1003.

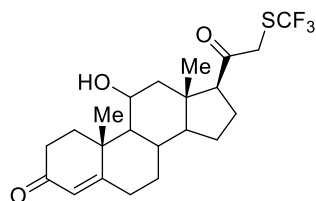

(10R,13S,17S)-11-hydroxy-10,13-dimethyl-17-(2-((trifluoromethyl)thio)acetyl)-1,2,6,7,8,9,10,11,12,13,14,15,16,17-tetradecahydro-3H-cyclopenta[a]phenanthren-3-one. (3b)

According to the general procedure in 0.1 mmol scale using 1.5 equiv Phth-SCF<sub>3</sub> reagent and 1.3 equiv Ph<sub>3</sub>P reagent with reaction time of 0.5 h, 24.2 mg, 57%, purified by flash chromatography, yellow oil; R<sub>f</sub> = 0.6 (petroleum ether/ethylacetate 2:1); <sup>1</sup>H NMR (400 MHz, Chloroform-*d*) δ 5.69 (s, 1H), 4.43 (s, 1H), 4.12 (q, *J* = 7.1 Hz, 1H), 3.84 (d, *J* = 3.7 Hz, 2H), 2.61 (t, *J* = 8.9 Hz, 1H), 2.54 – 2.43 (m, 2H), 2.36 (dt, *J* = 16.6, 4.2 Hz, 1H), 2.28 – 2.14 (m, 4H), 2.02 (d, *J* = 8.9 Hz, 2H), 1.83 (dtd, *J* = 22.9, 15.3, 14.5, 7.0 Hz, 4H), 1.45 (s, 3H), 1.30 – 1.24 (m, 2H), 1.17 (dd, *J* = 11.3, 5.2 Hz, 1H), 1.08 (dd, *J* = 13.5, 4.3 Hz, 1H), 0.95 (s, 3H). <sup>13</sup>C NMR (101 MHz, Chloroform-*d*) δ 202.8, 199.5, 171.9, 131.6 (q, *J* = 307.0 Hz) 122.4, 67.9, 61.9, 57.4, 56.3, 47.9, 43.7, 41.6 (q, *J* = 1.8 Hz), 39.2, 35.0, 33.8, 32.5, 32.0, 31.3, 24.3, 23.1, 20.9, 16.0. <sup>19</sup>F NMR (376 MHz, Chloroform-*d*) δ -41.4; HRMS (EI) caclcd for C<sub>22</sub>H<sub>29</sub>F<sub>3</sub>O<sub>3</sub>S (M<sup>+</sup>):412.1678, found 412.1694.

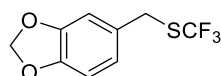

5-(((trifluoromethyl)thio)methyl)benzo[d][1,3]dioxole (4a) According to the general procedure in 0.1 mmol scale using 1.5 equiv Phth-SCF<sub>3</sub> reagent and 1.3 equiv Ph<sub>3</sub>P reagent with reaction time of 0.5 h, 14.5 mg, 62%, purified by flash chromatography, yellow oil; R<sub>f</sub> = 0.6 (petroleum ether/ethylacetate 20:1); <sup>1</sup>H NMR (400 MHz, Chloroform-*d*) δ 6.81 (d, *J* = 6.7 Hz, 1H), 6.78 (s, 1H), 6.75 (d, *J* = 7.9 Hz, 1H), 5.96 (s, 2H), 4.05 (s, 2H); <sup>19</sup>F NMR (376 MHz, Chloroform-*d*) δ -41.19; GCMS (EI) m/z 235 (M)<sup>+</sup>.

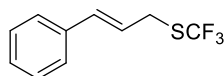

cinnamyl(trifluoromethyl)sulfane (4b) According to the general procedure in 0.1 mmol scale using 1.5 equiv Phth-SCF<sub>3</sub> reagent and 1.3 equiv Ph<sub>3</sub>P reagent with reaction time of 0.5 h, 14.2 mg, 65%, purified by flash chromatography, yellow oil; R<sub>f</sub> = 0.6 (petroleum ether); <sup>1</sup>H NMR (400 MHz, Chloroform-*d*) δ 7.36 (d, *J* = 7.4 Hz, 2H), 7.34 – 7.24 (m, 3H), 6.59 (d, *J* = 15.7 Hz, 1H), 6.21 (dt, *J* = 15.2, 7.4 Hz, 1H), 3.71 (d, *J* = 7.3 Hz, 2H). <sup>13</sup>C NMR (101 MHz, Chloroform-*d*) δ 136.1, 134.4, 130.8 (q, *J* = 308.1 Hz), 128.7, 128.1, 126.5, 123.0, 32.7 (q, *J* = 2.4 Hz). <sup>19</sup>F NMR (376 MHz, Chloroform-*d*) δ -40.9; HRMS (EI) caclcd for C<sub>10</sub>H<sub>9</sub>F<sub>3</sub>S (M<sup>+</sup>): 218.0372, found 218.0873.

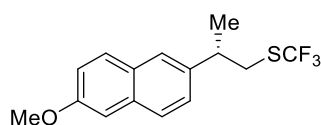

(S)-2-(6-methoxynaphthalen-2-yl)propyl(trifluoromethyl)sulfane (4c) According to the general procedure in 0.1 mmol scale using 1.5 equiv Phth-SCF<sub>3</sub> reagent and 1.3 equiv Ph<sub>3</sub>P reagent with

reaction time of 0.5 h, 18.7 mg, 63%, purified by flash chromatography, yellow solid; Rf = 0.5 (petroleum ether);  $^1\text{H}$  NMR (400 MHz, Chloroform-*d*)  $\delta$  7.70 (dd,  $J$  = 8.2, 6.1 Hz, 2H), 7.56 (s, 1H), 7.29 (d,  $J$  = 8.5 Hz, 1H), 7.18 – 7.08 (m, 2H), 3.90 (s, 3H), 3.26 – 3.19 (m, 1H), 3.13 (ddd,  $J$  = 24.0, 11.8, 6.2 Hz, 2H), 1.45 (d,  $J$  = 6.5 Hz, 3H).  $^{13}\text{C}$  NMR (101 MHz, Chloroform-*d*)  $\delta$  157.6, 139.0, 133.7, 131.2 (q,  $J$  = 307.0 Hz), 129.2, 128.9, 127.3, 125.6, 125.3, 119.1, 105.6, 55.3, 39.6, 37.7 (q,  $J$  = 1.7 Hz), 20.8.  $^{19}\text{F}$  NMR (376 MHz, Chloroform-*d*)  $\delta$  -41.2; HRMS (EI) calcd for  $\text{C}_{15}\text{H}_{15}\text{F}_3\text{OS}$  ( $\text{M}^+$ ): 300.0790, found 300.0798.

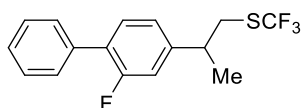

(2-(2-fluoro-[1,1'-biphenyl]-4-yl)propyl)(trifluoromethyl)sulfane (**4d**) According to the general procedure in 0.1 mmol scale using 1.5 equiv Phth-SCF<sub>3</sub> reagent and 1.3 equiv Ph<sub>3</sub>P reagent with reaction time of 0.5 h, 26.3 mg, 82%, purified by flash chromatography, colorless oil; Rf = 0.4 (petroleum ether);  $^1\text{H}$  NMR (400 MHz, Chloroform-*d*)  $\delta$  7.54 (d,  $J$  = 7.4 Hz, 2H), 7.47 – 7.38 (m, 3H), 7.37 (d,  $J$  = 7.4 Hz, 1H), 7.05 (d,  $J$  = 8.0 Hz, 1H), 7.00 (d,  $J$  = 11.6 Hz, 1H), 3.20 – 3.13 (m, 1H), 3.08 (td,  $J$  = 11.7, 9.8, 5.3 Hz, 2H), 1.42 (d,  $J$  = 6.2 Hz, 3H);  $^{19}\text{F}$  NMR (376 MHz, Chloroform-*d*)  $\delta$  -41.1, -117.5;  $^{13}\text{C}$  NMR (101 MHz, Chloroform-*d*)  $\delta$  159.8 (d,  $J$  = 248.6 Hz), 145.5 (d,  $J$  = 7.1 Hz), 135.5 (d,  $J$  = 1.2 Hz), 131.1 (q,  $J$  = 307.4), 130.9 (d,  $J$  = 4.0 Hz), 129.0, 128.9, 128.5, 127.7, 123.0 (d,  $J$  = 3.3 Hz), 114.5 (d,  $J$  = 23.2 Hz), 39.4, 37.4 (q,  $J$  = 1.9 Hz), 20.7; HRMS (EI) calcd for  $\text{C}_{16}\text{H}_{14}\text{F}_4\text{S}$  ( $\text{M}^+$ ): 314.0747, found 314.0758.

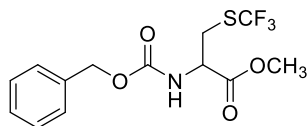

methyl *N*-((benzyloxy)carbonyl)-*S*-(trifluoromethyl)cysteinate (**4e**) According to the general procedure in 0.1 mmol scale using 1.5 equiv Phth-SCF<sub>3</sub> reagent and 1.3 equiv Ph<sub>3</sub>P reagent with reaction time of 0.5 h, 18.3 mg, 54%, purified by flash chromatography, orange oil; Rf = 0.7 (petroleum ether/ ethylacetate 5:1);  $^1\text{H}$  NMR (400 MHz, Chloroform-*d*)  $\delta$  7.40 – 7.30 (m, 5H), 5.63 (s, 1H), 5.13 (s, 2H), 4.72 – 4.65 (m, 1H), 3.79 (s, 3H), 3.49 (dd,  $J$  = 14.1, 4.0 Hz, 1H), 3.34 (dd,  $J$  = 14.1, 4.8 Hz, 1H);  $^{19}\text{F}$  NMR (376 MHz, Chloroform-*d*)  $\delta$  -41.0;  $^{13}\text{C}$  NMR (101 MHz, Chloroform-*d*)  $\delta$  169.8, 155.5, 135.9, 130.4 (q,  $J$  = 308.1 Hz), 128.6, 128.3, 128.1, 67.4, 53.3, 53.0 (q,  $J$  = 2.4 Hz). GCMS (EI)  $m/z$  337 ( $\text{M}^+$ ).

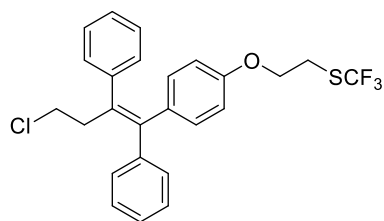

(*Z*)-(2-(4-(4-chloro-1,2-diphenylbut-1-en-1-yl)phenoxy)ethyl)(trifluoromethyl)sulfane (**4f**) According to the general procedure in 0.1 mmol scale using 1.5 equiv Phth-SCF<sub>3</sub> reagent and 1.3 equiv Ph<sub>3</sub>P reagent with reaction time of 0.5 h, 31.8 mg, 69%, purified by flash chromatography,

colorless oil; Rf = 0.6 (petroleum ether/ethylacetate 20:1); <sup>1</sup>H NMR (400 MHz, Chloroform-*d*) δ 7.40 – 7.26 (m, 5H), 7.23 – 7.10 (m, 5H), 6.80 (d, *J* = 8.6 Hz, 2H), 6.54 (d, *J* = 8.6 Hz, 2H), 4.07 (t, *J* = 6.5 Hz, 2H), 3.41 (t, *J* = 7.4 Hz, 2H), 3.16 (t, *J* = 6.5 Hz, 2H), 2.92 (t, *J* = 7.4 Hz, 2H); <sup>19</sup>F NMR (376 MHz, Chloroform-*d*) δ -41.3; <sup>13</sup>C NMR (101 MHz, Chloroform-*d*) δ 156.2, 142.7, 141.6, 140.9, 135.6, 131.8, 130.9 (q, *J* = 309.1 Hz), 129.5, 128.4, 128.2, 127.0, 126.7, 113.6, 66.2, 42.8, 38.6, 28.9 (q, *J* = 2.1 Hz); HRMS (EI) caclcd for C<sub>25</sub>H<sub>22</sub>ClF<sub>3</sub>OS (M<sup>+</sup>): 462.1026, found 462.1042.

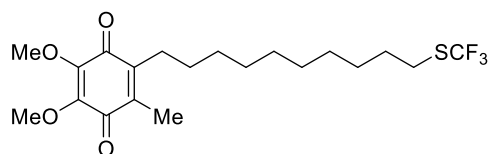

*2,3-dimethoxy-5-methyl-6-(10-((trifluoromethyl)thio)decyl)cyclohexa-2,5-diene-1,4-dione* (**4g**)

According to the general procedure in 0.1 mmol scale using 1.5 equiv Phth-SCF<sub>3</sub> reagent and 1.3 equiv Ph<sub>3</sub>P reagent with reaction time of 0.5 h, 34.9 mg, 83%, purified by flash chromatography, brown oil; Rf = 0.5 (petroleum ether/ethylacetate 10:1); <sup>1</sup>H NMR (400 MHz, Chloroform-*d*) δ 4.02 – 3.96 (m, 6H), 2.87 (t, *J* = 7.4 Hz, 2H), 2.45 (t, *J* = 7.2 Hz, 2H), 2.01 (s, 3H), 1.68 (p, *J* = 7.4 Hz, 2H), 1.36 (dd, *J* = 14.8, 7.4 Hz, 14H); <sup>19</sup>F NMR (376 MHz, Chloroform-*d*) δ -41.28; GCMS (EI) m/z 422 (M)<sup>+</sup>.

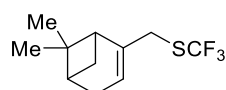

*((6,6-dimethylbicyclo[3.1.1]hept-2-en-2-yl)methyl)(trifluoromethyl)sulfane* (**4h**) According to the general procedure in 0.1 mmol scale using 1.5 equiv Phth-SCF<sub>3</sub> reagent and 1.3 equiv Ph<sub>3</sub>P reagent with reaction time of 0.5 h, 18.5 mg, 78%, purified by flash chromatography, yellow oil; Rf = 0.7 (petroleum ether); <sup>1</sup>H NMR (400 MHz, Chloroform-*d*) δ 5.56 (s, 1H), 3.58 – 3.43 (m, 2H), 2.42 (dt, *J* = 8.8, 5.7 Hz, 1H), 2.35 – 2.22 (m, 2H), 2.19 (t, *J* = 5.5 Hz, 1H), 2.13 – 2.06 (m, 1H), 1.49 – 1.36 (m, 1H), 1.30 (s, 3H), 0.82 (s, 3H); <sup>19</sup>F NMR (376 MHz, Chloroform-*d*) δ -41.3; <sup>13</sup>C NMR (101 MHz, Chloroform-*d*) δ 141.2, 131.9 (q, *J* = 308.1 Hz), 122.4, 45.0, 40.4, 36.2 (q, *J* = 2.2 Hz), 34.4, 31.6, 31.3, 26.1, 21.1; HRMS (EI) caclcd for C<sub>11</sub>H<sub>15</sub>F<sub>3</sub>S (M<sup>+</sup>): 236.0841, found 236.0844.

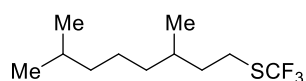

*(3,7-dimethyloctyl)(trifluoromethyl)sulfane* (**4i**) According to the general procedure in 0.1 mmol scale using 1.5 equiv Phth-SCF<sub>3</sub> reagent and 1.3 equiv Ph<sub>3</sub>P reagent with reaction time of 0.5 h, 17.1 mg, 72%, purified by flash chromatography, yellow oil; Rf = 0.5 (petroleum ether); <sup>1</sup>H NMR (400 MHz, Chloroform-*d*) δ 2.97 – 2.80 (m, 2H), 1.53 (dd, *J* = 13.0, 6.4 Hz, 4H), 1.30 (dd, *J* = 13.7, 7.5 Hz, 3H), 1.17 – 1.11 (m, 3H), 0.90 (d, *J* = 6.1 Hz, 3H), 0.87 (d, *J* = 6.6 Hz, 6H); <sup>19</sup>F NMR (376 MHz, Chloroform-*d*) δ -41.24.

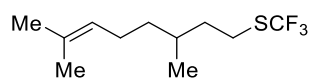

*(3,7-dimethyloct-6-en-1-yl)(trifluoromethyl)sulfane* (**4j**) According to the general procedure in 0.1 mmol scale using 1.5 equiv Phth-SCF<sub>3</sub> reagent and 1.3 equiv Ph<sub>3</sub>P reagent with reaction time of 0.5

h, 19.1 mg, 79%, purified by flash chromatography, yellow oil;  $^1\text{H}$  NMR (400 MHz, Chloroform-*d*)  $\delta$  5.08 (t,  $J = 7.1$  Hz, 1H), 2.97 – 2.80 (m, 2H), 1.98 (dt,  $J = 15.7, 7.3$  Hz, 3H), 1.68 (s, 3H), 1.60 (s, 3H), 1.53 (ddd,  $J = 17.4, 11.7, 6.0$  Hz, 2H), 1.39 – 1.29 (m, 2H), 0.91 (d,  $J = 6.4$  Hz, 3H);  $^{19}\text{F}$  NMR (376 MHz, Chloroform-*d*)  $\delta$  -41.24; GCMS (EI)  $m/z$  240 (M) $^+$ .

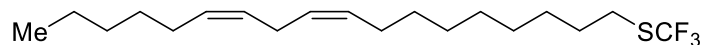

*((9Z,12Z)-octadeca-9,12-dien-1-yl)(trifluoromethyl)sulfane (4k)* According to the general procedure in 0.1 mmol scale using 1.5 equiv Phth-SCF<sub>3</sub> reagent and 1.3 equiv Ph<sub>3</sub>P reagent with reaction time of 0.5 h, 25.4 mg, 73%, purified by flash chromatography, yellow oil;  $R_f = 0.6$  (petroleum ether/ethylacetate 20:1);  $^1\text{H}$  NMR (400 MHz, Chloroform-*d*)  $\delta$  5.40 (dd,  $J = 10.7, 7.0$  Hz, 2H), 5.32 (dd,  $J = 10.7, 7.1$  Hz, 2H), 2.87 (t,  $J = 7.4$  Hz, 2H), 2.77 (t,  $J = 6.3$  Hz, 2H), 2.05 (q,  $J = 6.4$  Hz, 4H), 1.68 (p,  $J = 7.3$  Hz, 2H), 1.38 (dd,  $J = 14.8, 6.3$  Hz, 6H), 1.33 – 1.28 (m, 10H), 0.89 (t,  $J = 6.7$  Hz, 3H);  $^{19}\text{F}$  NMR (376 MHz, Chloroform-*d*)  $\delta$  -41.6;  $^{13}\text{C}$  NMR (101 MHz, Chloroform-*d*)  $\delta$  130.2, 131.2 (q,  $J = 307.0$  Hz), 130.0, 128.1, 127.9, 31.6, 31.4, 29.9 (q,  $J = 2.0$  Hz), 29.4, 29.4, 29.3, 29.2, 28.9, 28.5, 27.2, 27.2, 25.6, 22.6, 14.1.

## 6. Preparation of substrates.

General procedure:

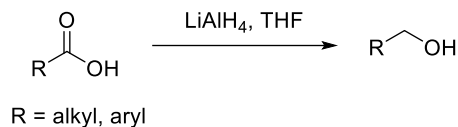

The following reactants were prepared from the carboxylic acid according to general procedure (Ref. (a) X. Jiang, Z. Deng and P. Tang, *Angew Chem. Int. Ed.*, 2018, **57**, 292; (b) L. Wang, T. Li, S. Perveen, S. Zhang, X. Wang, Y. Ouyang and P. Li, *Angew Chem. Int. Ed.*, 2022, **61**, e202213943; (c) G. P. Choudhary, K. Soni and P. Soni, *Journal of Drug Delivery and Therapeutics*, 2019, **9**, 316.).

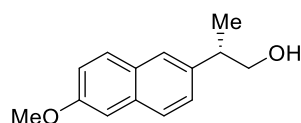

(*S*)-2-(6-methoxynaphthalen-2-yl)propan-1-ol

4.5 mmol scale, white solid, 426.6 mg, 66%. <sup>1</sup>H NMR (400 MHz, Chloroform-*d*) δ 7.73 – 7.66 (m, 2H), 7.59 (s, 1H), 7.33 (d, *J* = 8.4 Hz, 1H), 7.16 – 7.08 (m, 2H), 3.90 (s, 3H), 3.75 (d, *J* = 6.7 Hz, 2H), 3.06 (h, *J* = 6.9 Hz, 1H), 1.45 (s, 1H), 1.34 (d, *J* = 7.0 Hz, 3H); GCMS (EI) *m/z* 216 (M)<sup>+</sup>.

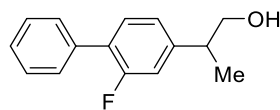

2-(2-fluoro-[1,1'-biphenyl]-4-yl)propan-1-ol

2.0 mmol scale, white solid, 302.0 mg, 66%. <sup>1</sup>H NMR (400 MHz, Chloroform-*d*) δ 7.53 (d, *J* = 8.1 Hz, 2H), 7.43 (t, *J* = 7.7 Hz, 2H), 7.36 (dd, *J* = 14.6, 7.6 Hz, 2H), 7.07 (dd, *J* = 17.6, 9.9 Hz, 2H), 3.73 (d, *J* = 6.7 Hz, 2H), 2.98 (h, *J* = 6.9 Hz, 1H), 1.50 (s, 1H), 1.30 (d, *J* = 7.0 Hz, 3H); GCMS (EI) *m/z* 230 (M)<sup>+</sup>.

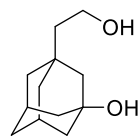

(*1s,3s,5R,7S*)-3-(2-hydroxyethyl)adamantan-1-ol

4.0 mmol scale, white solid, 385.6 mg, 98%, <sup>1</sup>H NMR (400 MHz, Chloroform-*d*) δ 3.71 (t, *J* = 7.4 Hz, 2H), 2.19 (s, 2H), 1.68 (d, *J* = 11.5 Hz, 2H), 1.63 (d, *J* = 11.7 Hz, 3H), 1.54 (s, 2H), 1.46 (d, *J* = 12.8 Hz, 8H); GCMS (EI) *m/z* 196 (M)<sup>+</sup>.



## 7. NMR spectras of products.

(4-phenylbutyl)(trifluoromethyl)sulfane (**2a**)

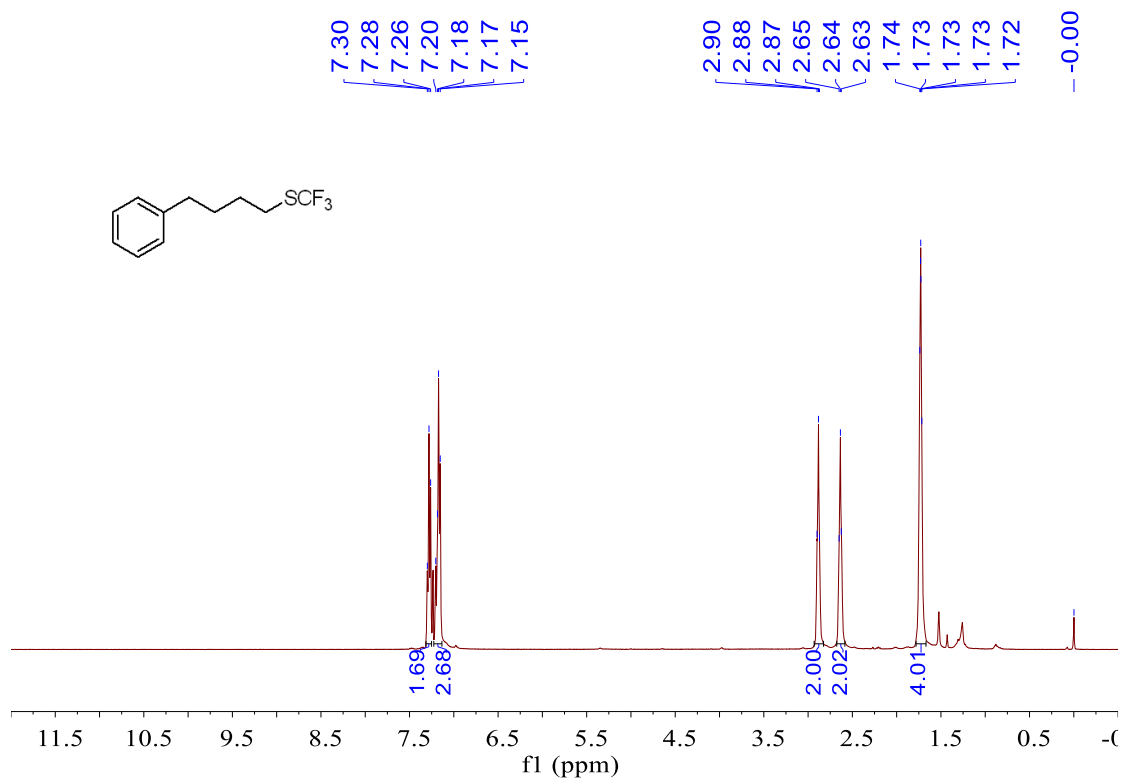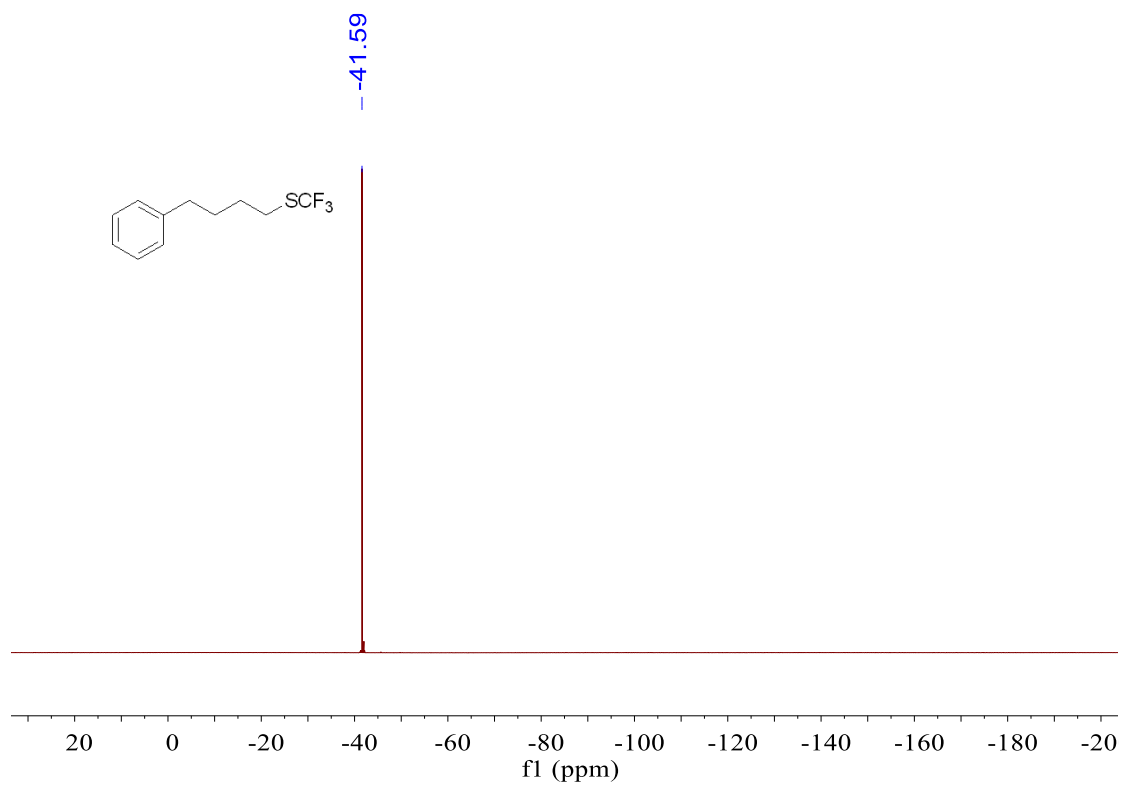

(3-(benzyloxy)propyl)(trifluoromethyl)sulfane (**2b**)

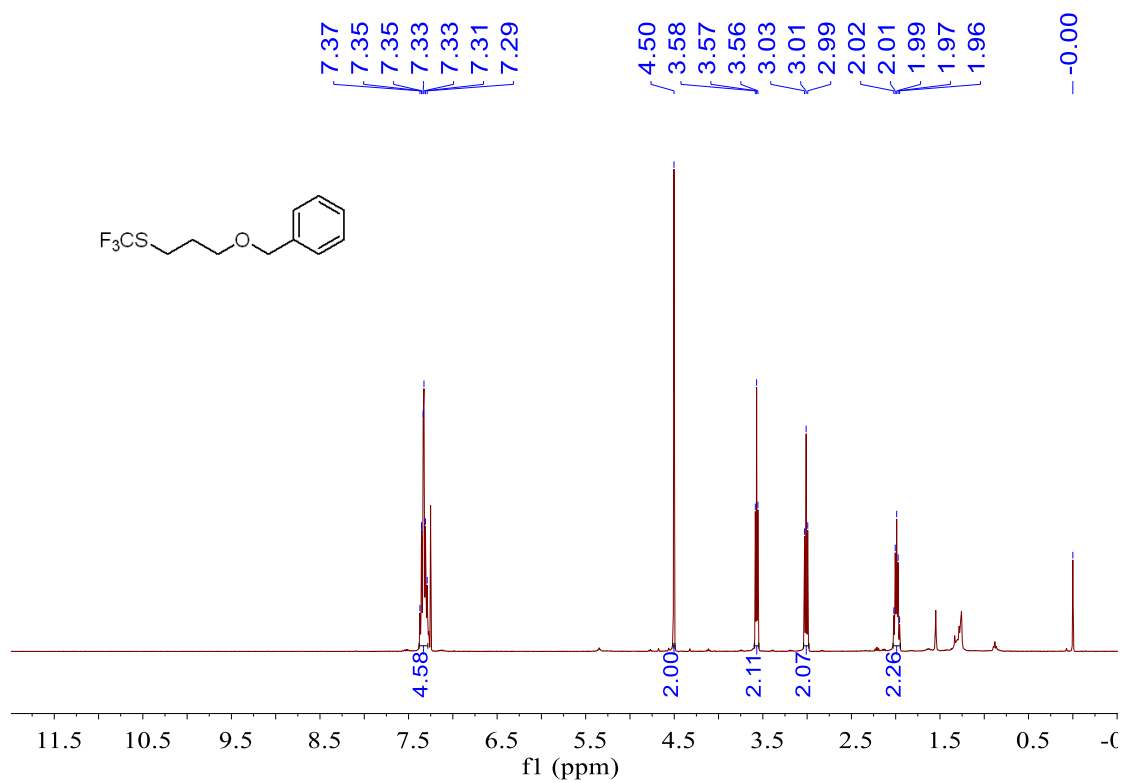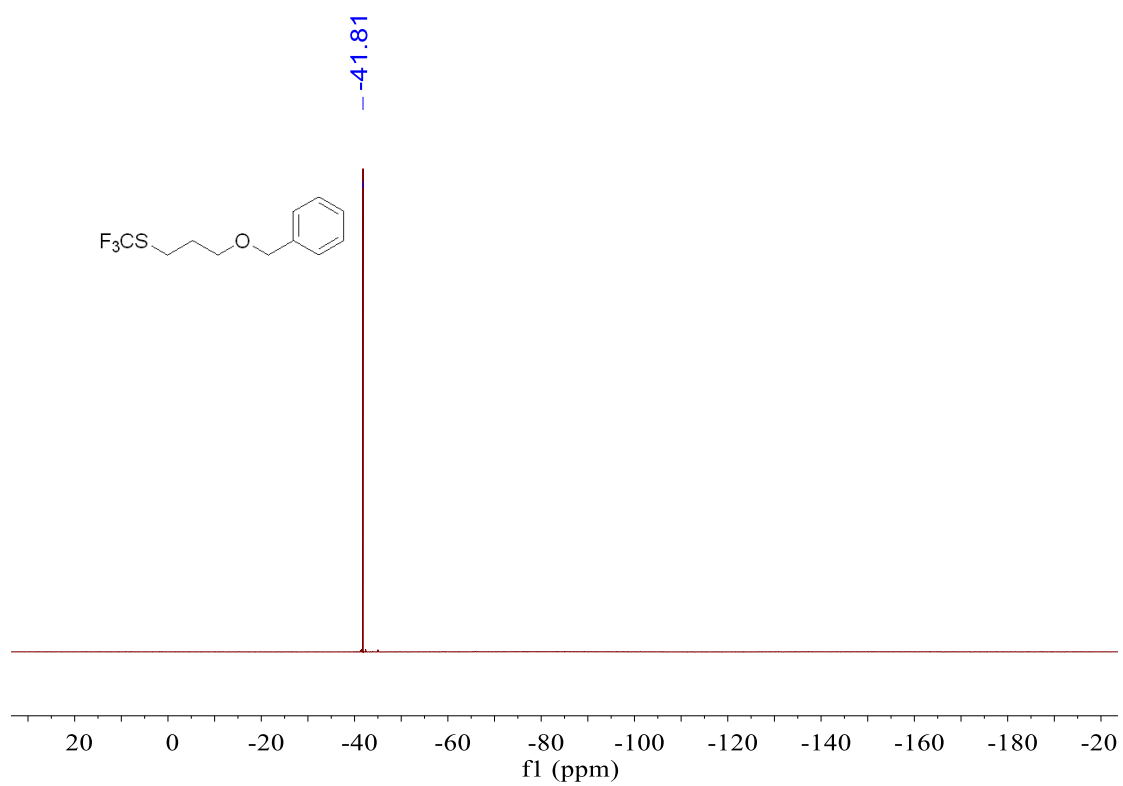

(3-(4-bromophenyl)propyl)(trifluoromethyl)sulfane (**2c**)

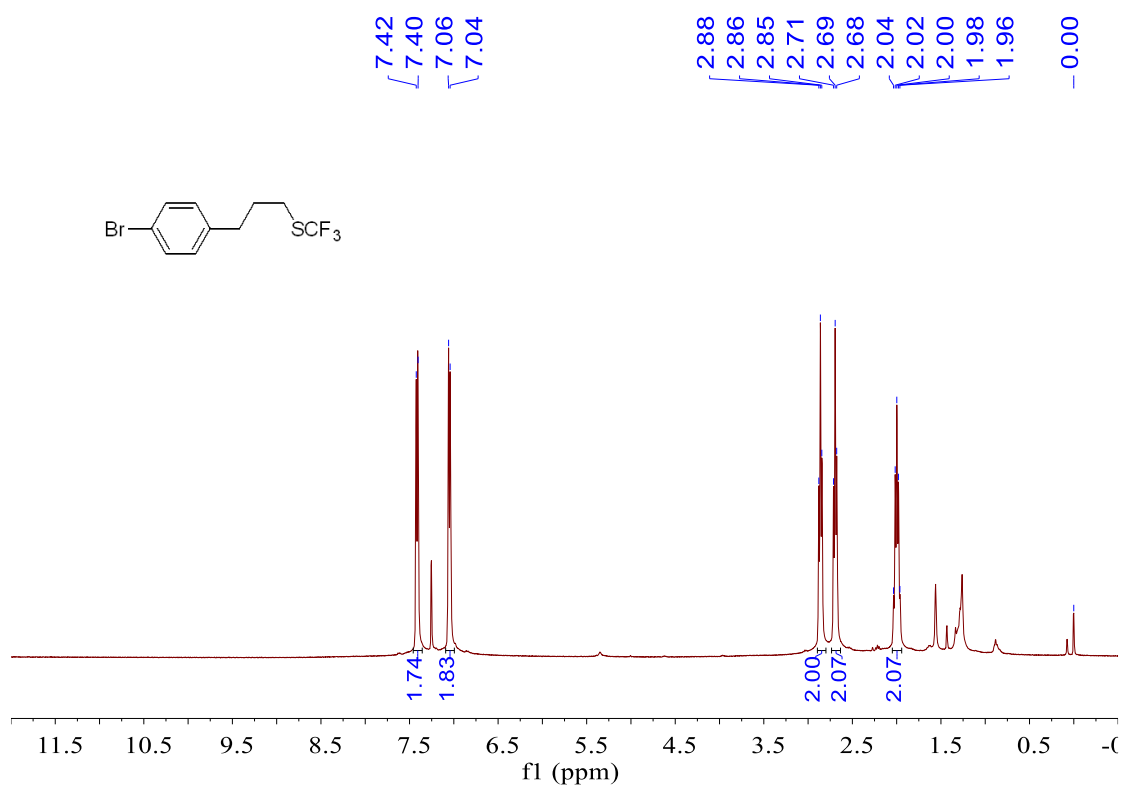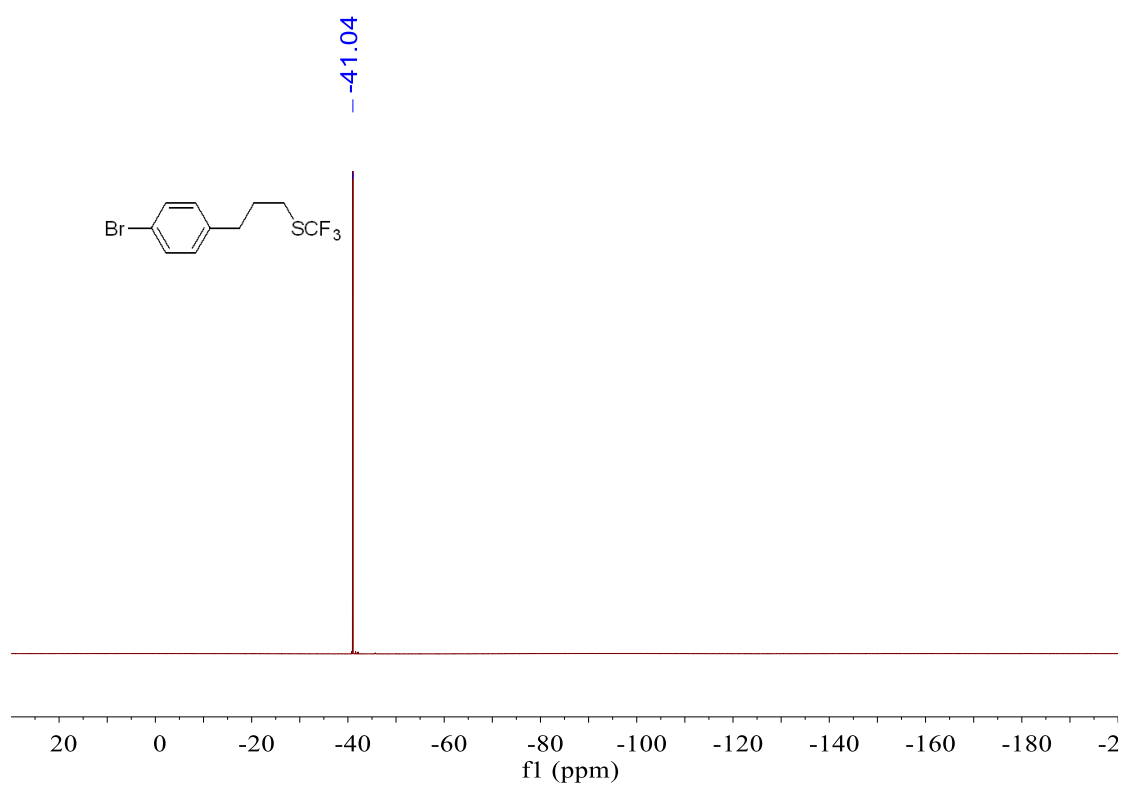

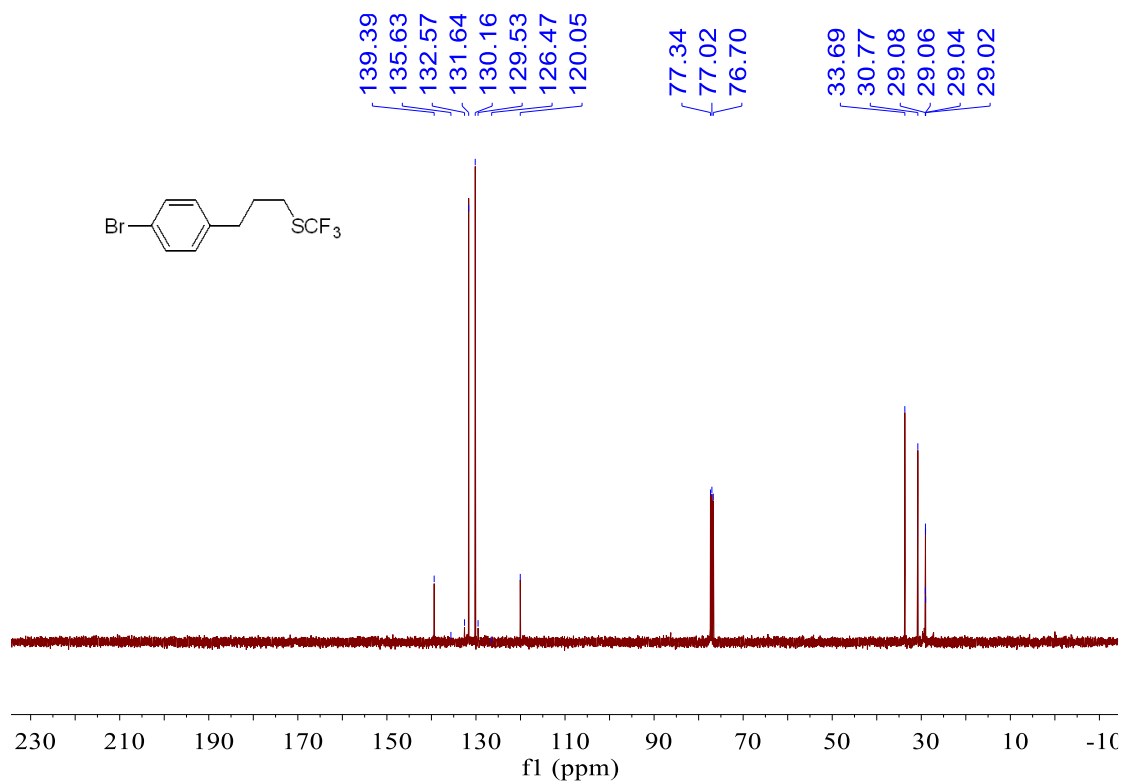

*benzyl (3-((trifluoromethyl)thio)propyl)carbamate (2d)*

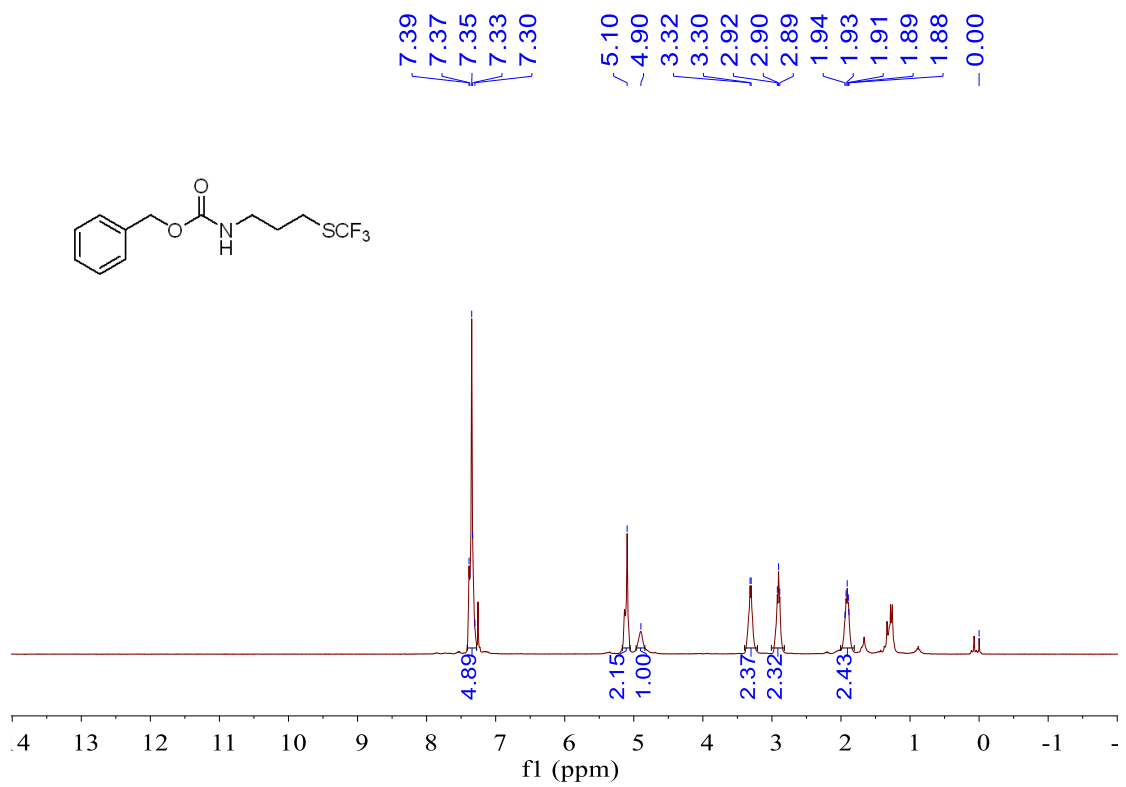

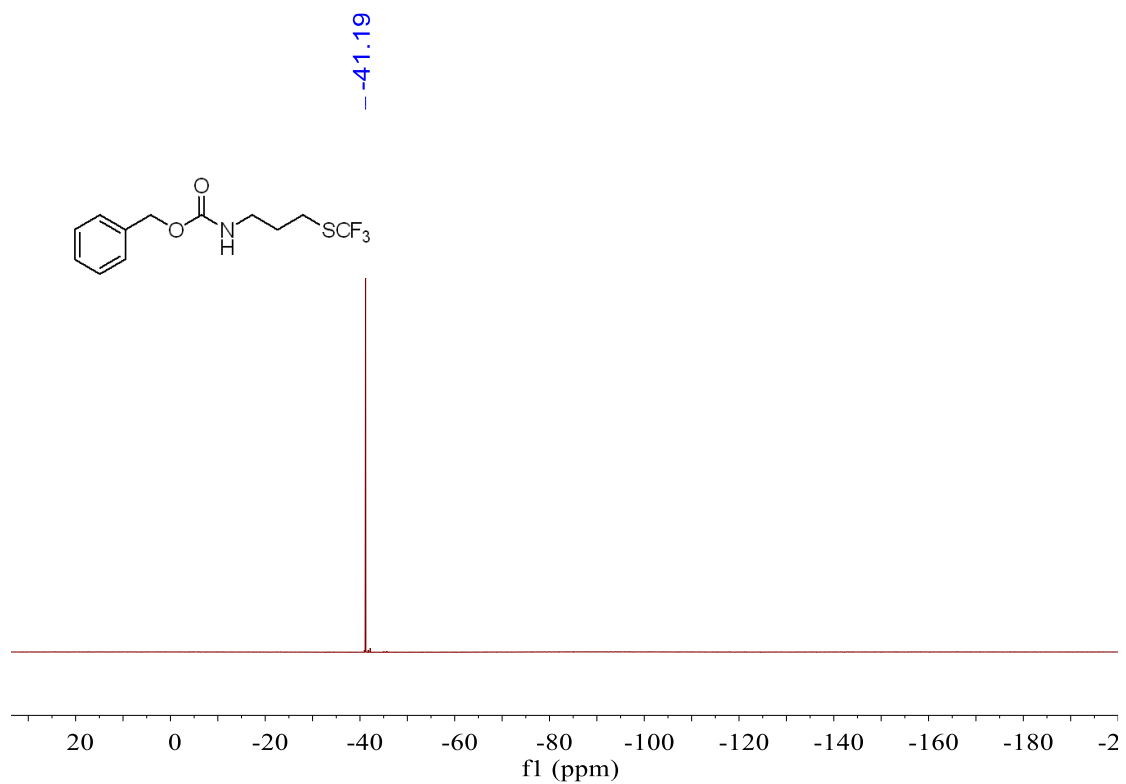

(3-phenylprop-2-yn-1-yl)(trifluoromethyl)sulfane (2e)

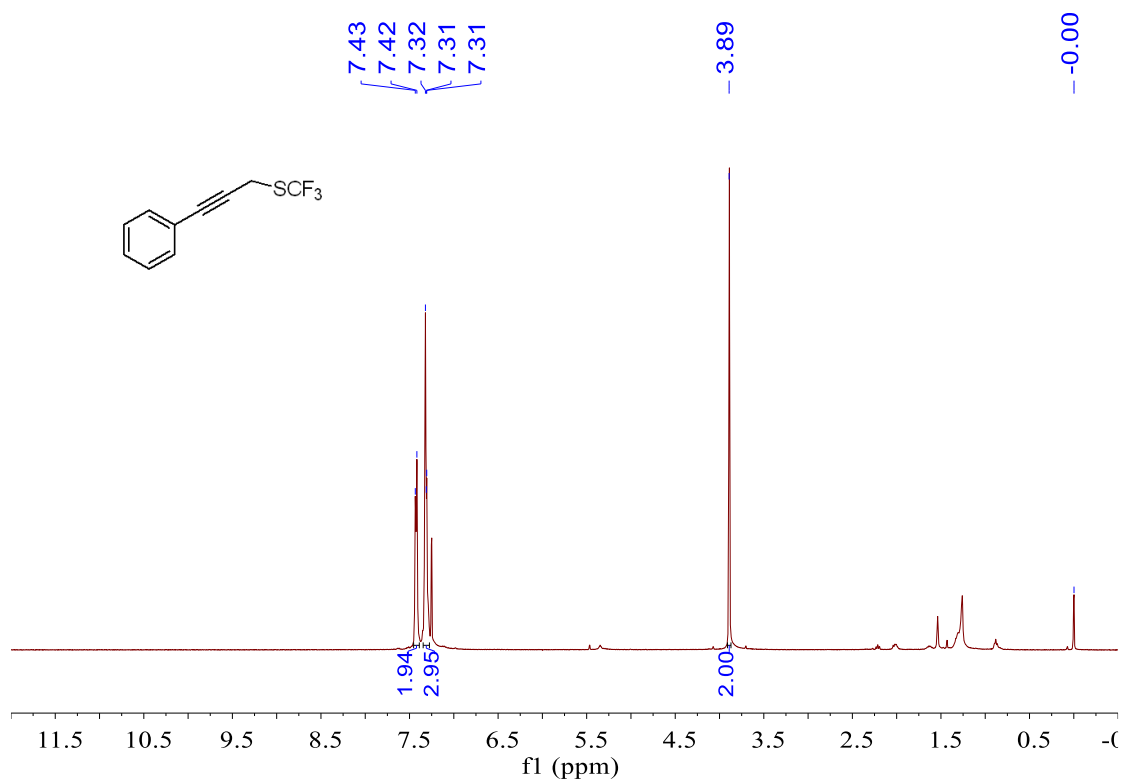

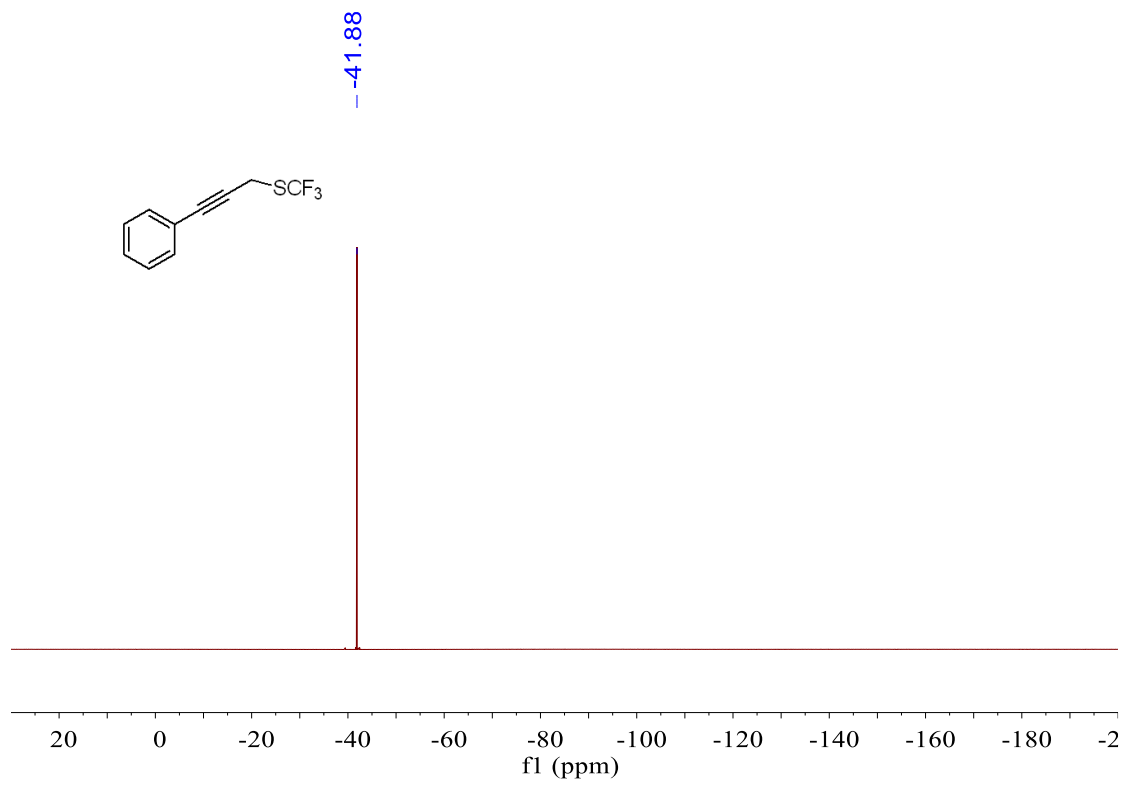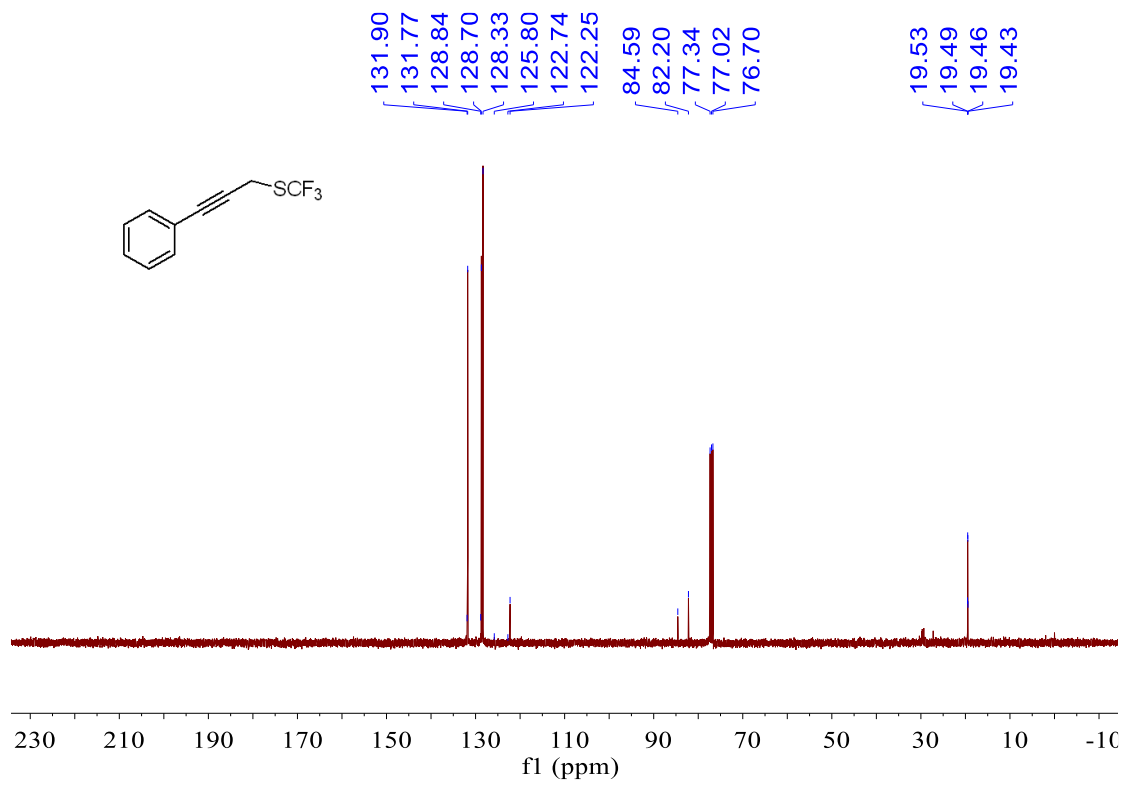

(4-(*tert*-butyl)benzyl)(trifluoromethyl)sulfane (**2f**)

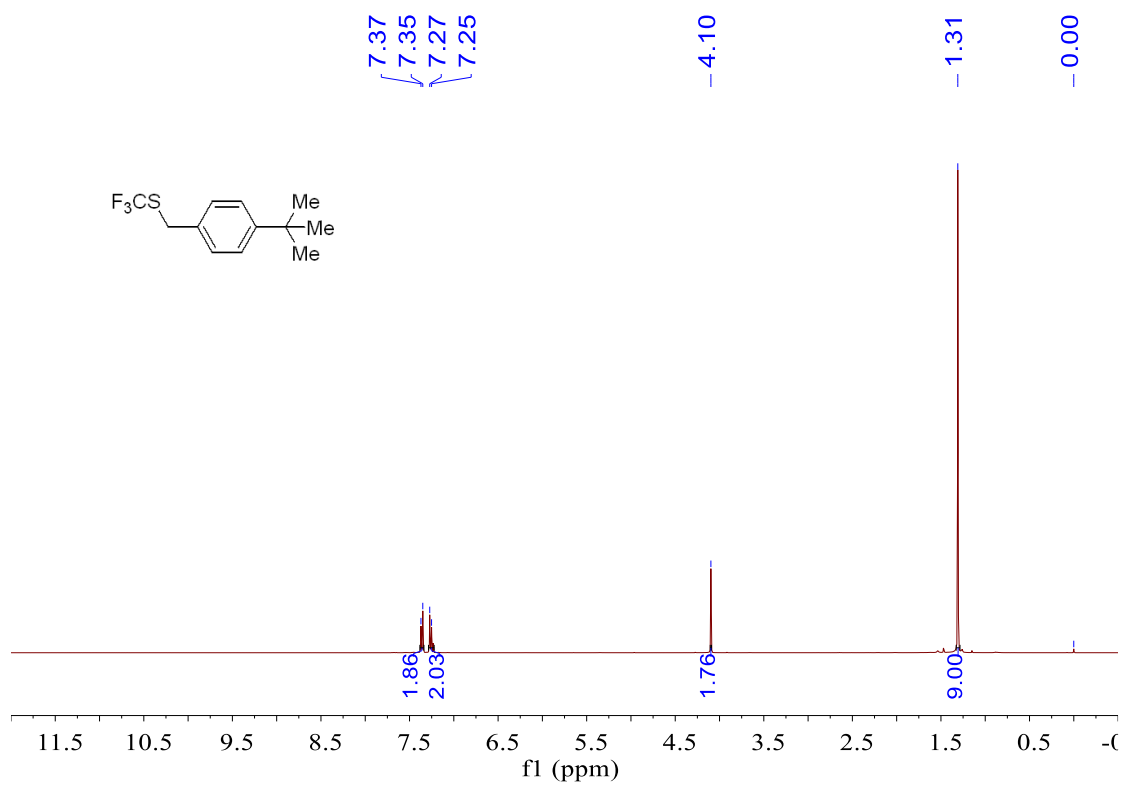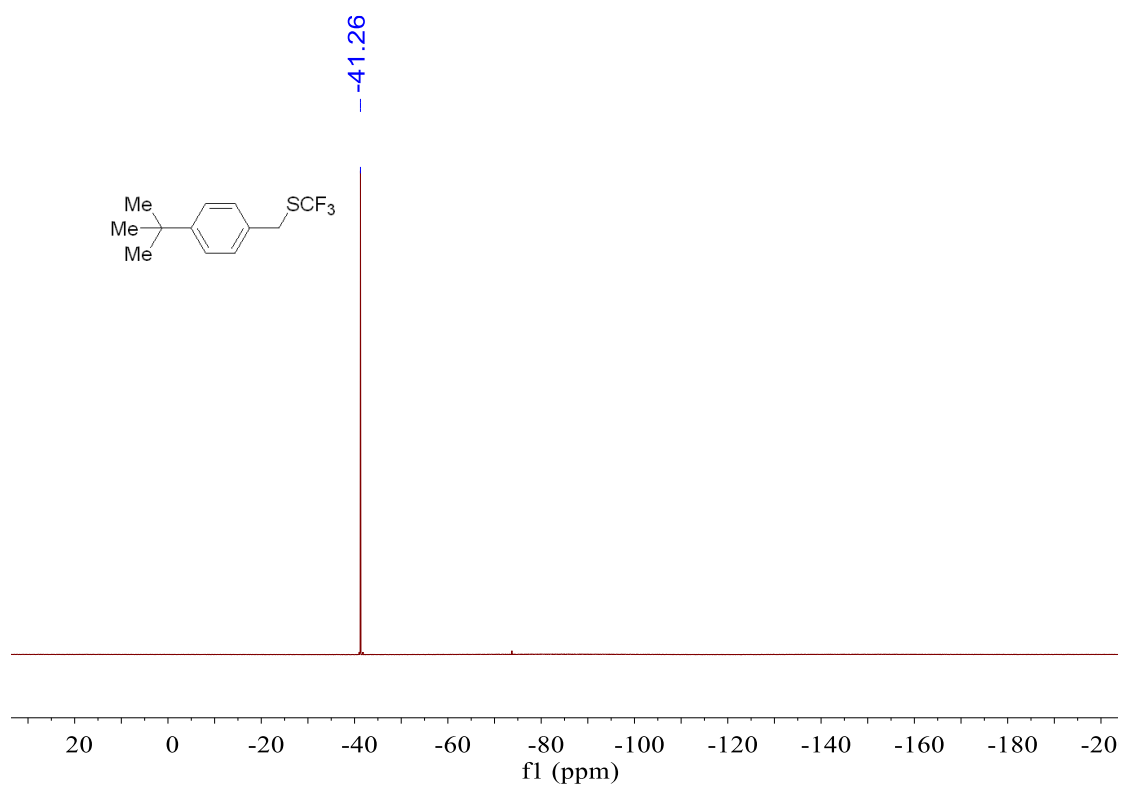

*([1,1'-biphenyl]-4-ylmethyl)(trifluoromethyl)sulfane (2g)*

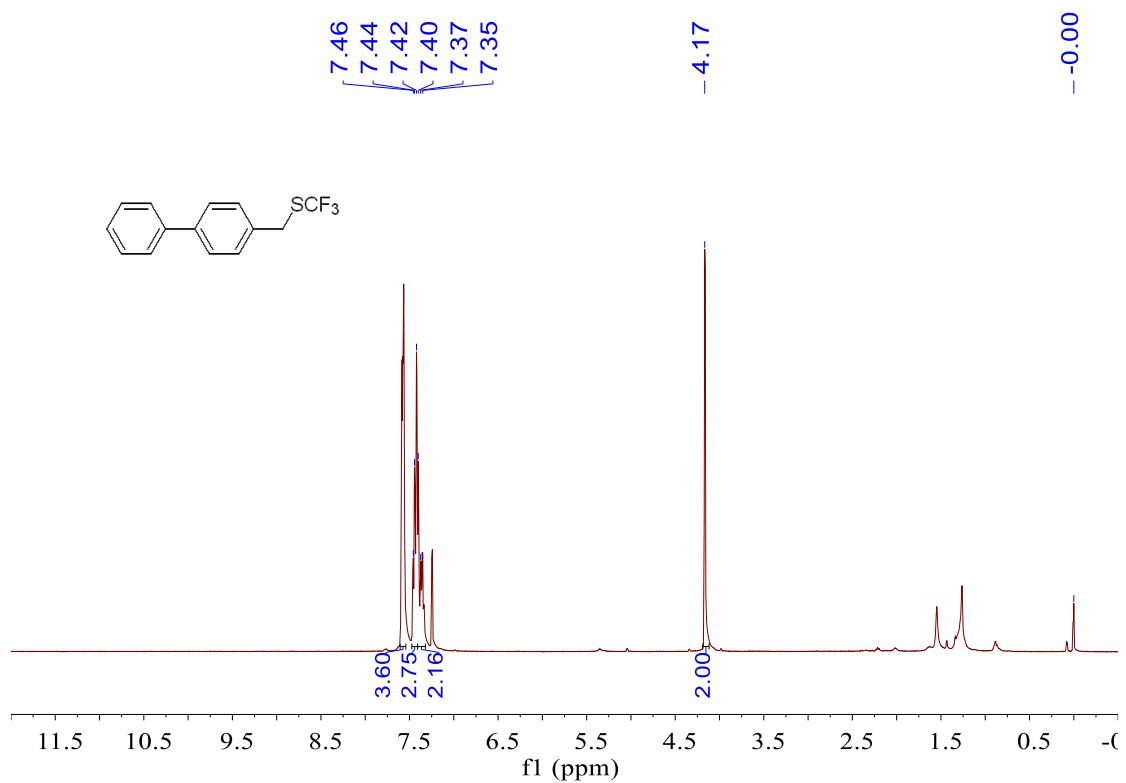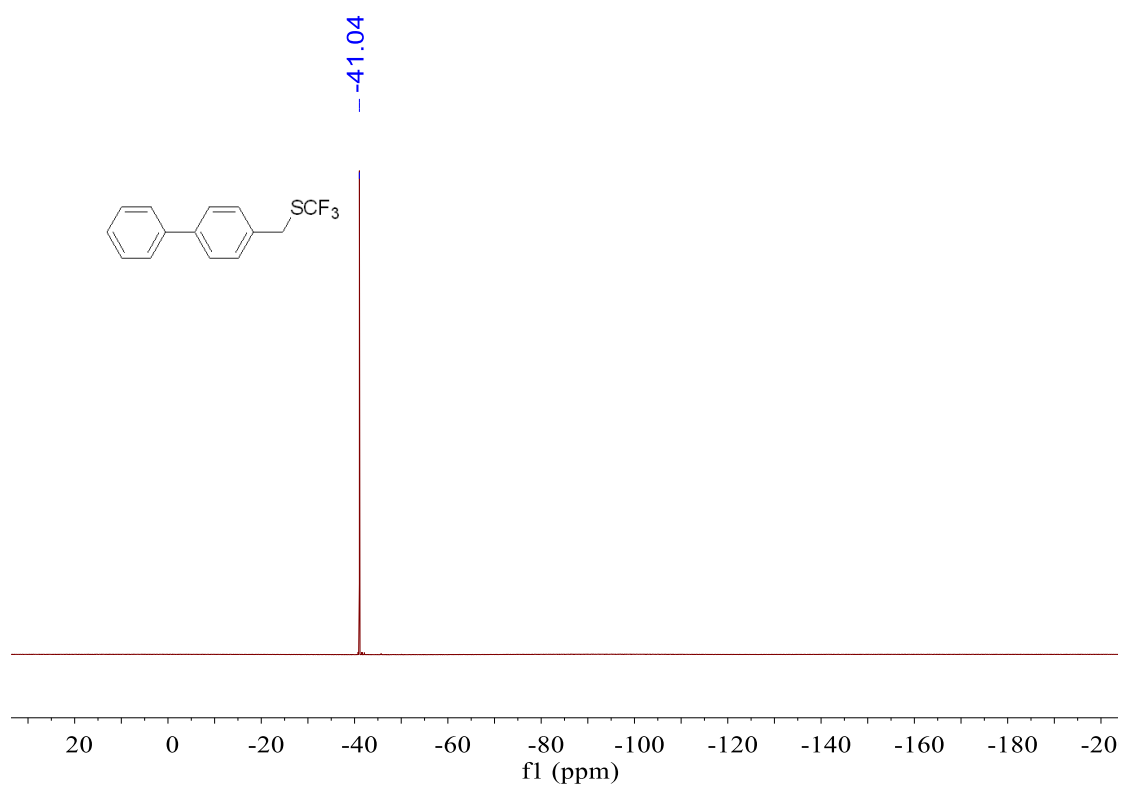



(3-phenoxybenzyl)(trifluoromethyl)sulfane (**2h**)

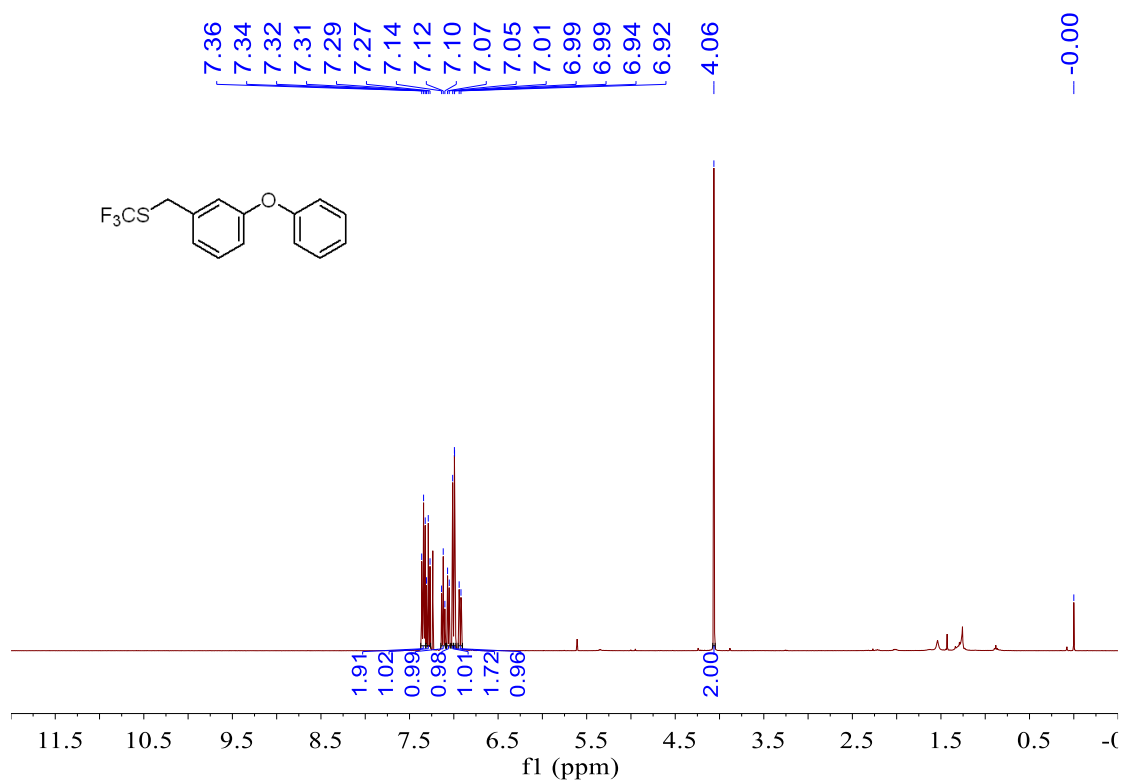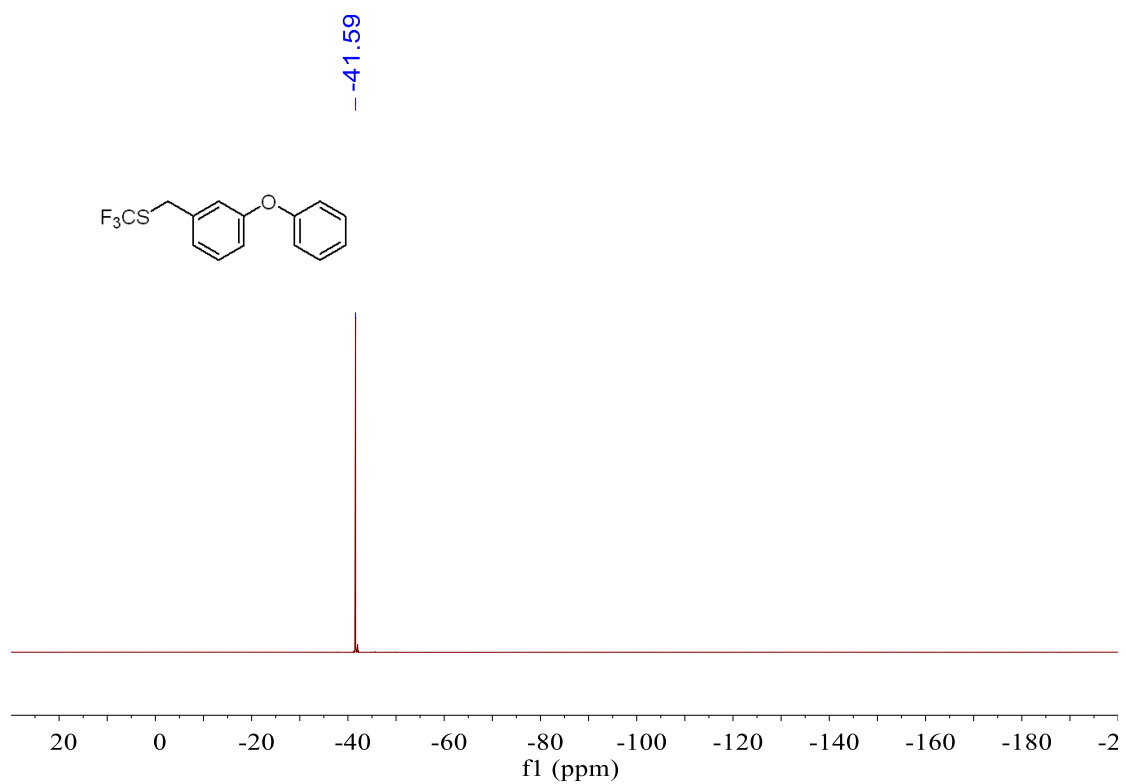

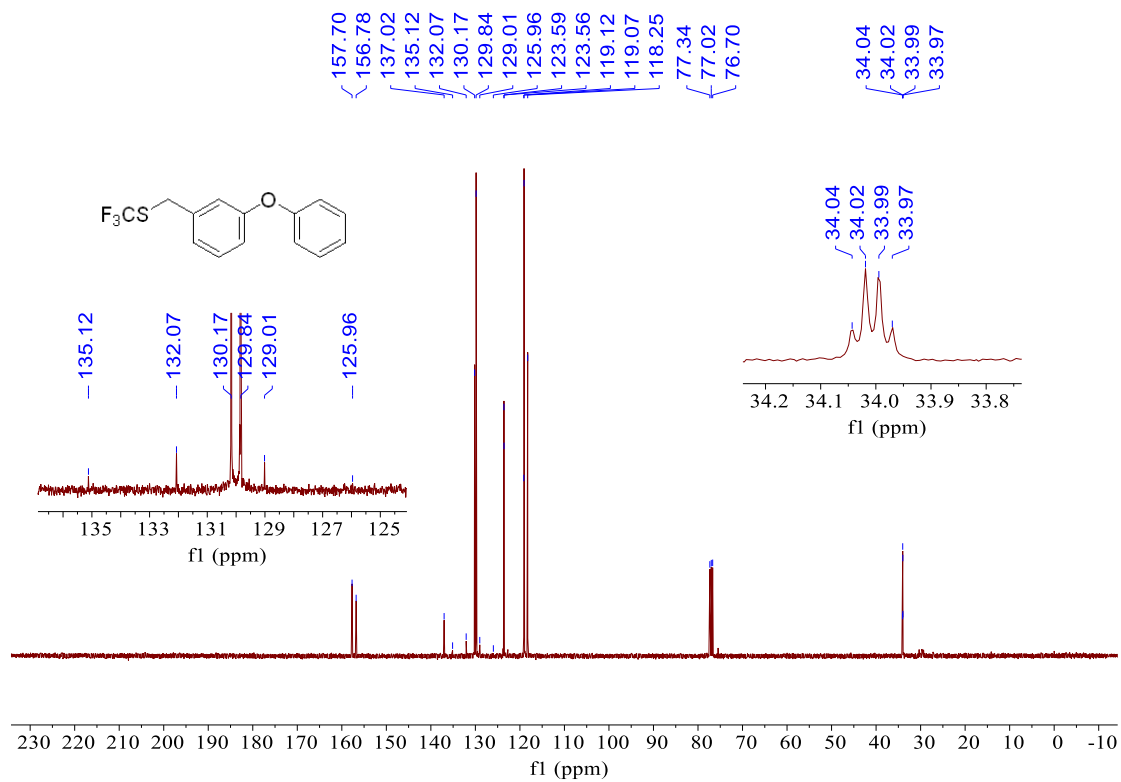

*(3,5-dimethoxybenzyl)(trifluoromethyl)sulfane (2i)*

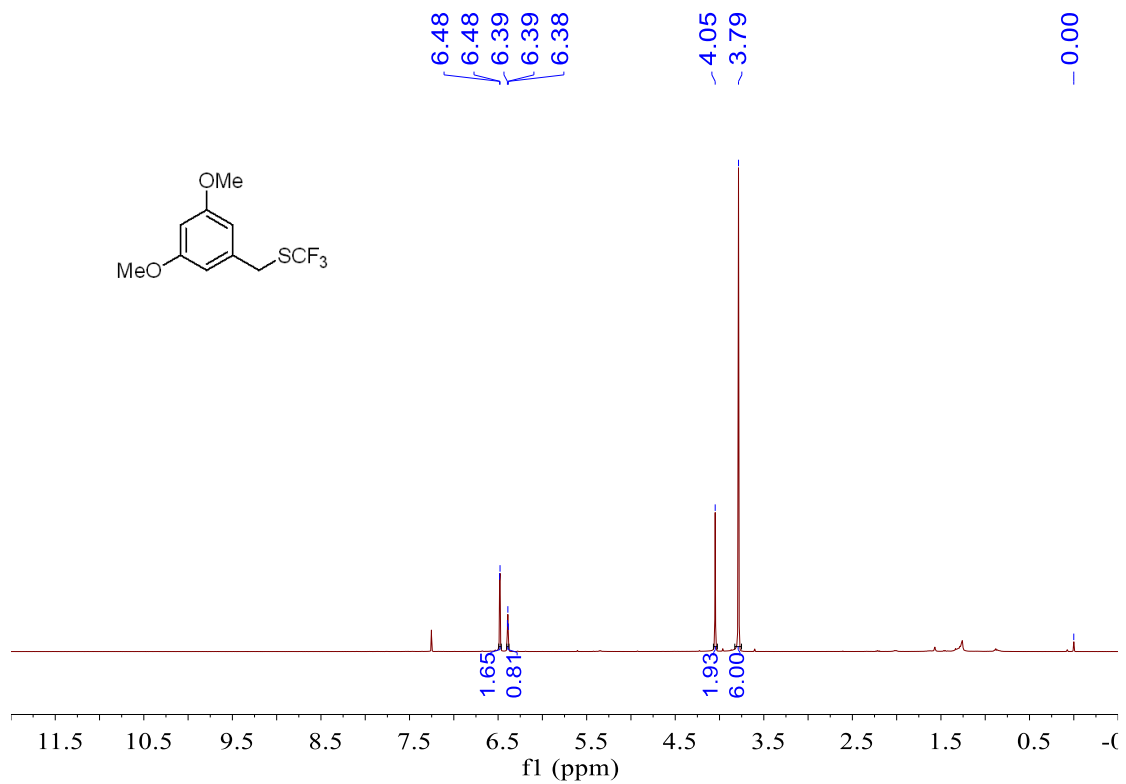

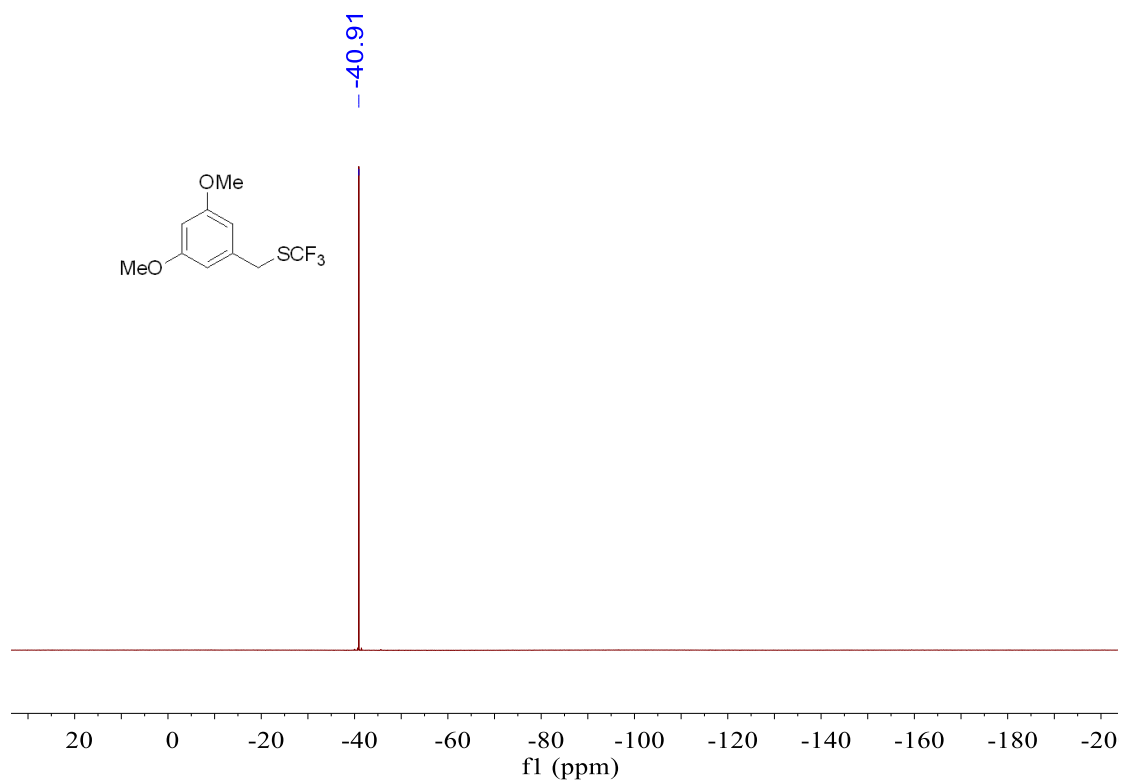

*(2,4-dichlorobenzyl)(trifluoromethyl)sulfane (2j)*

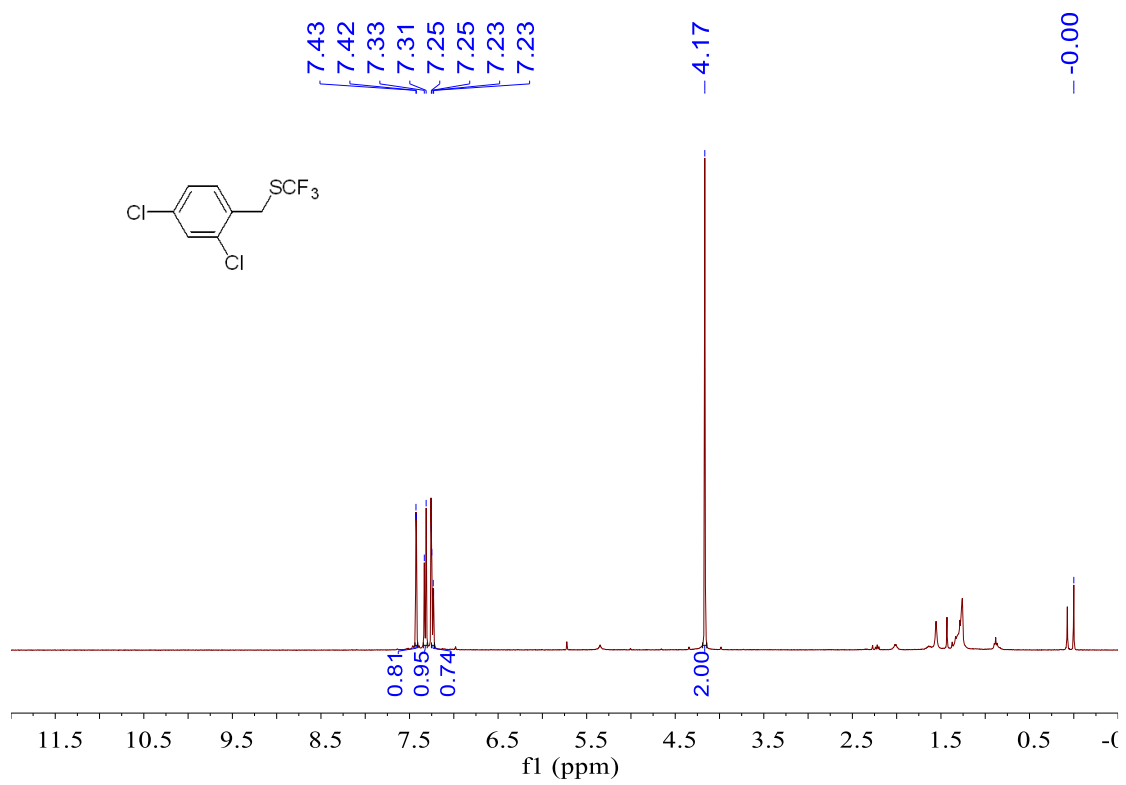

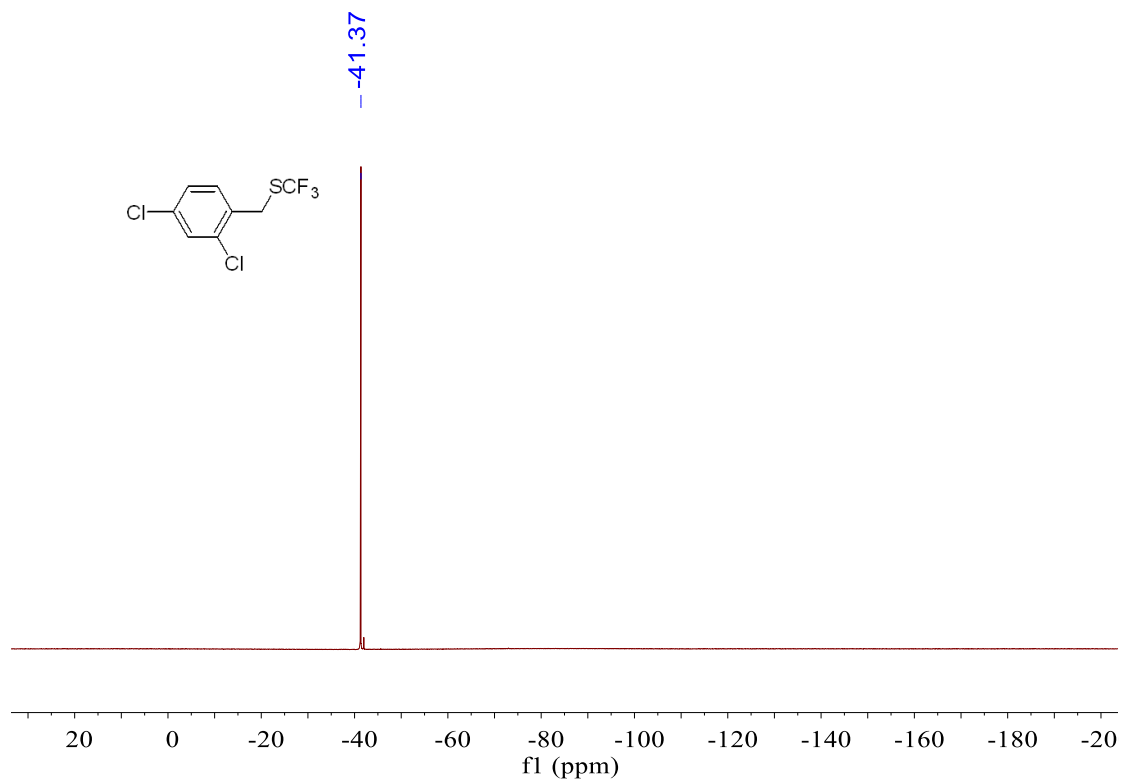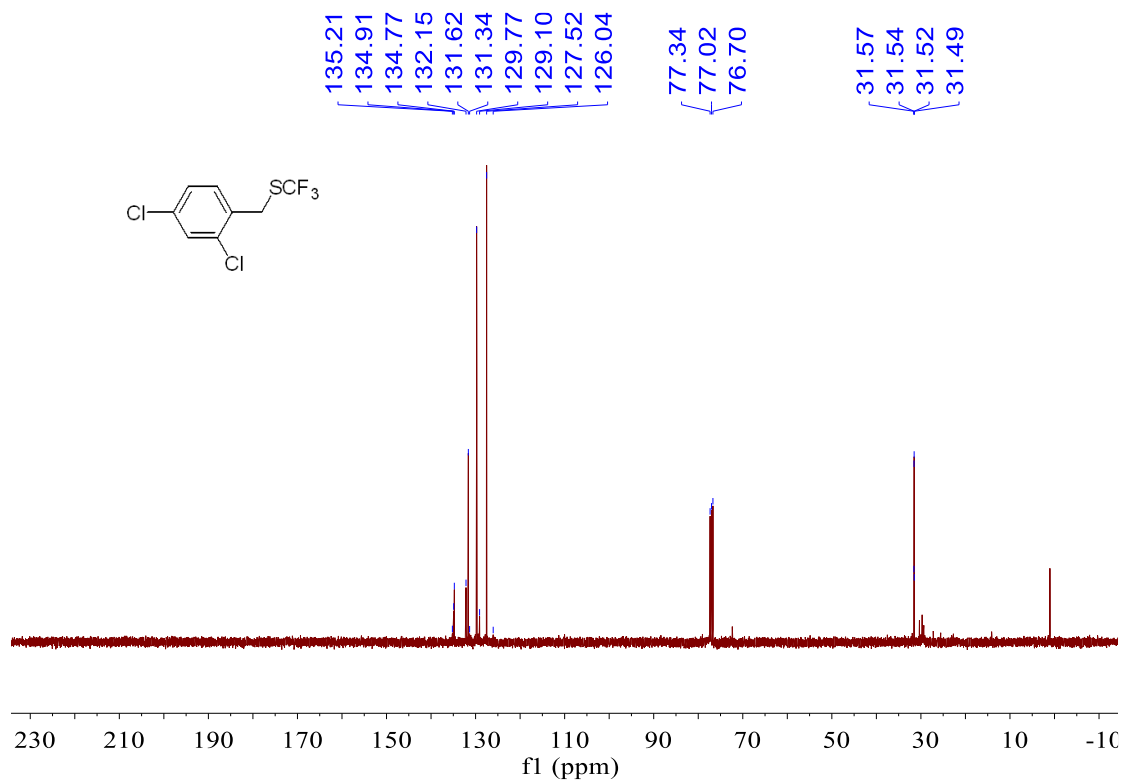

(trifluoromethyl)(2,4,6-trimethylbenzyl)sulfane (**2k**)

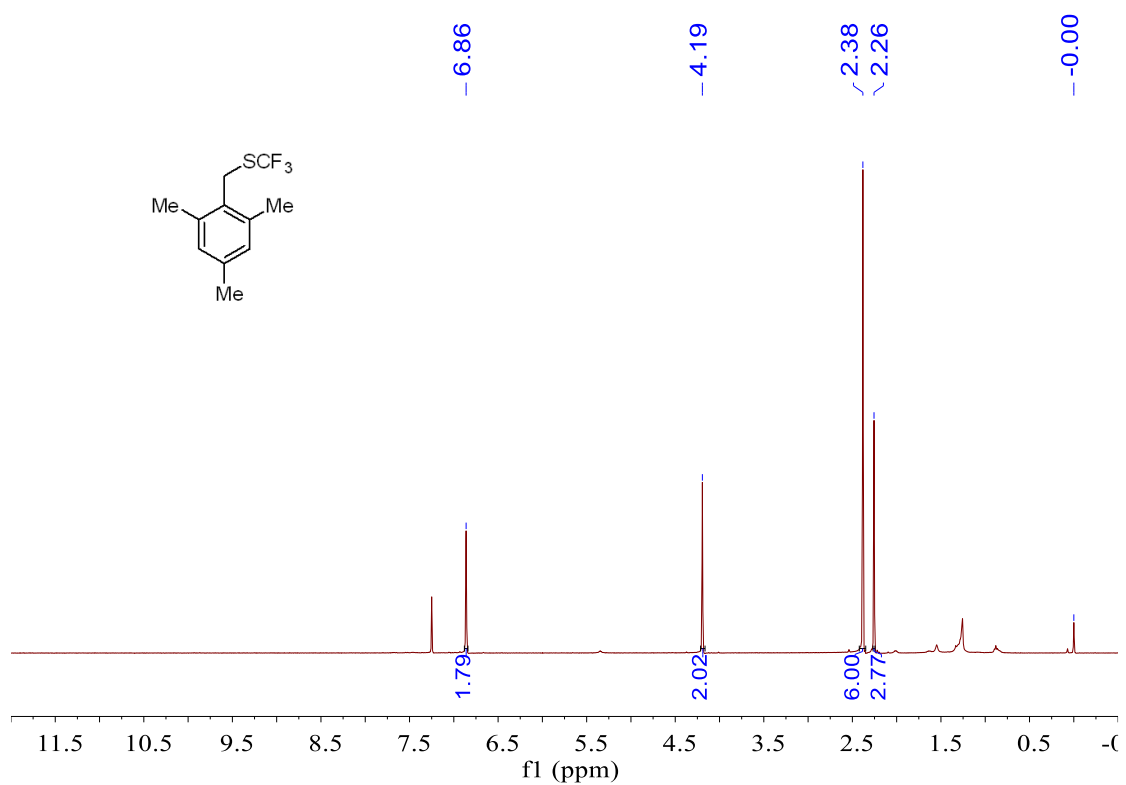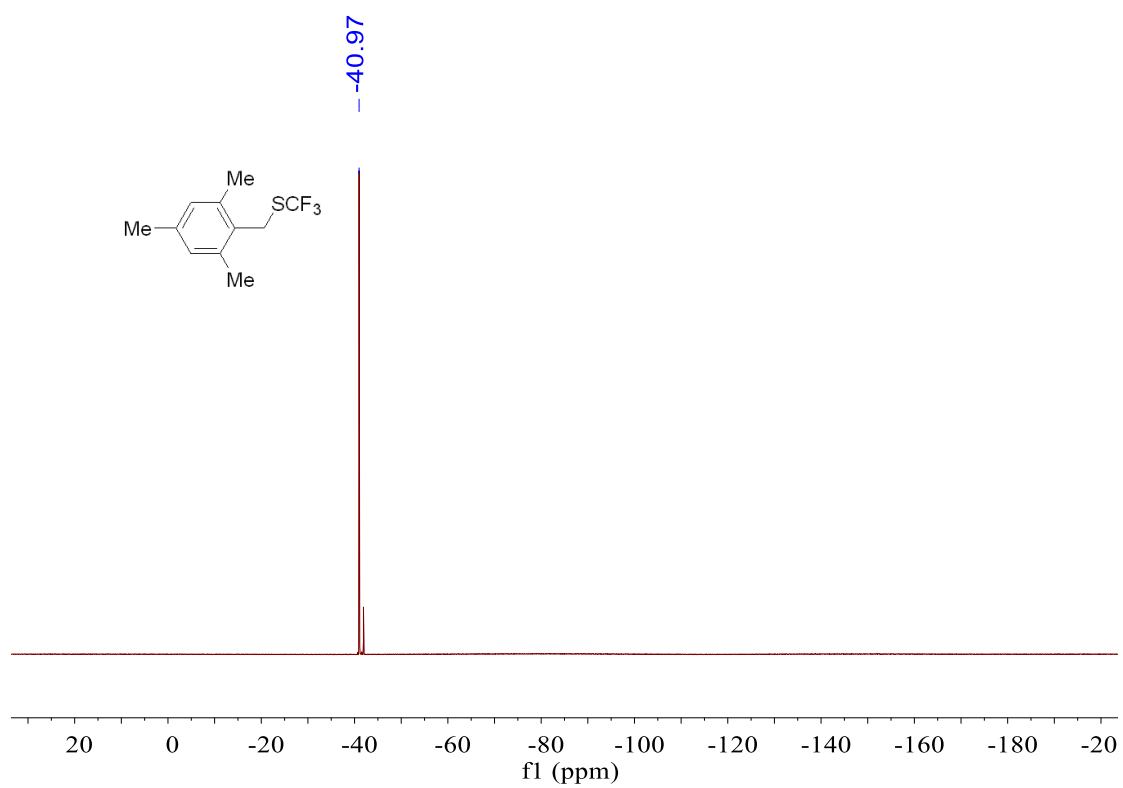

2-(((trifluoromethyl)thio)methyl)benzofuran (**21**)

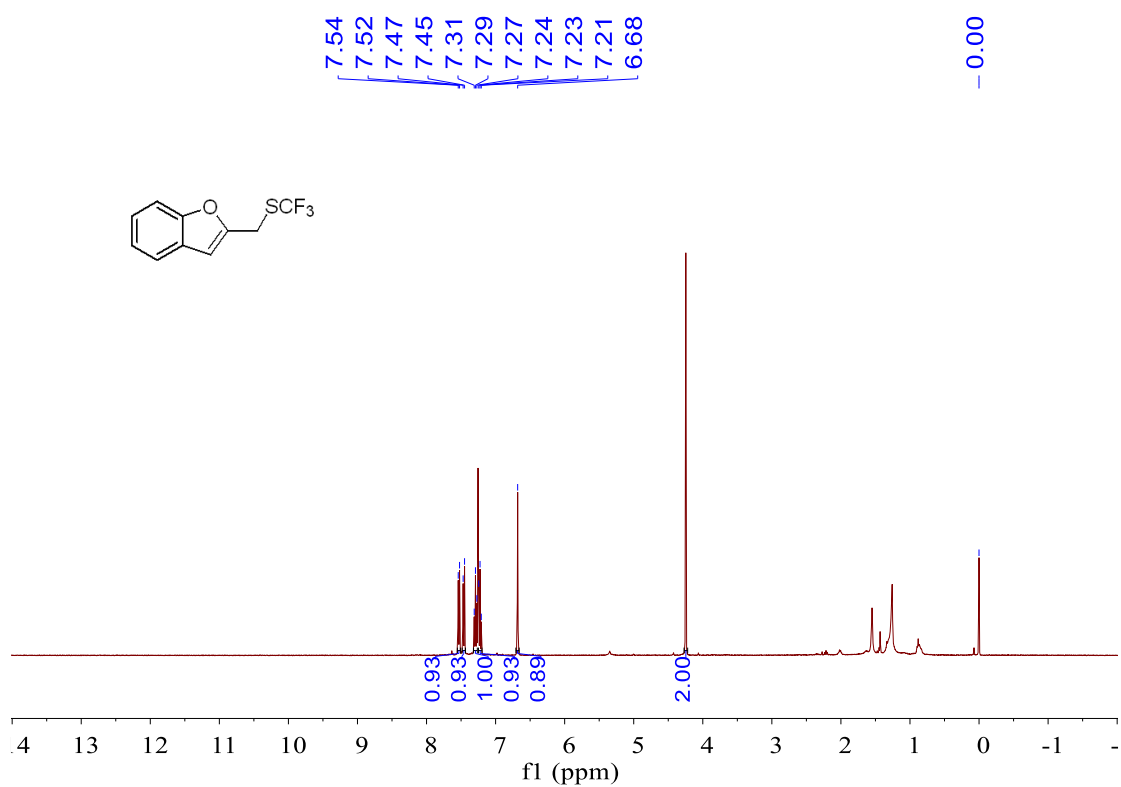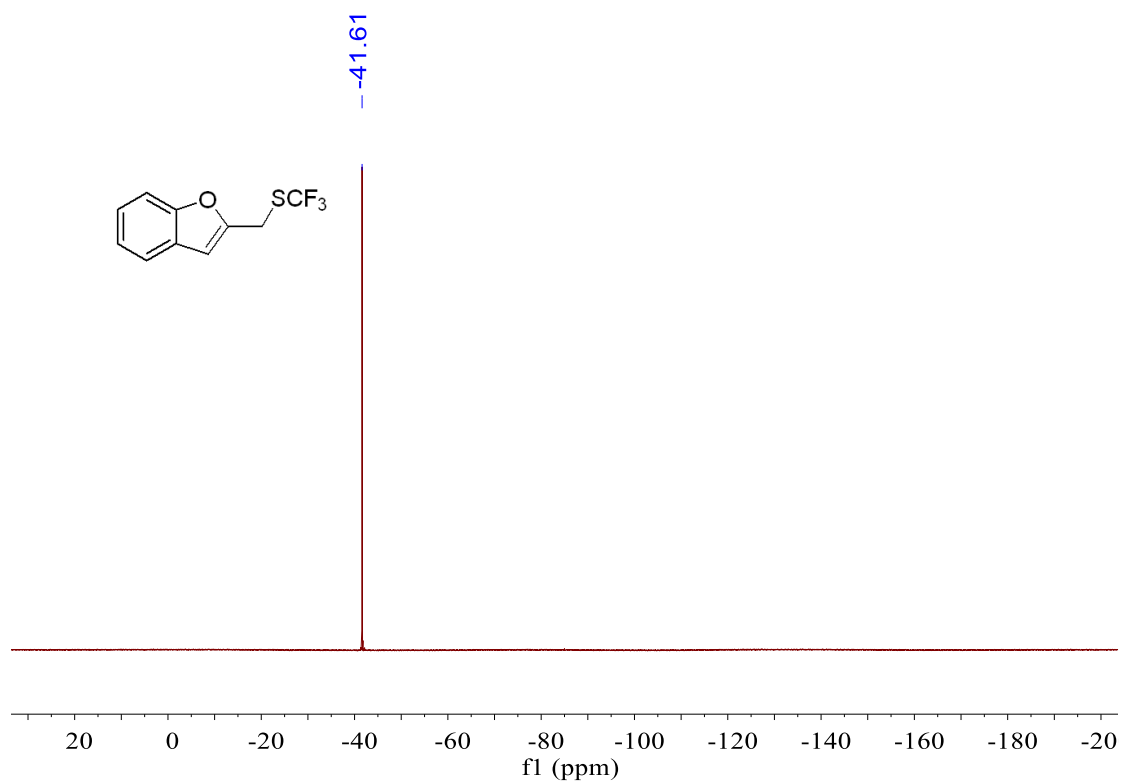

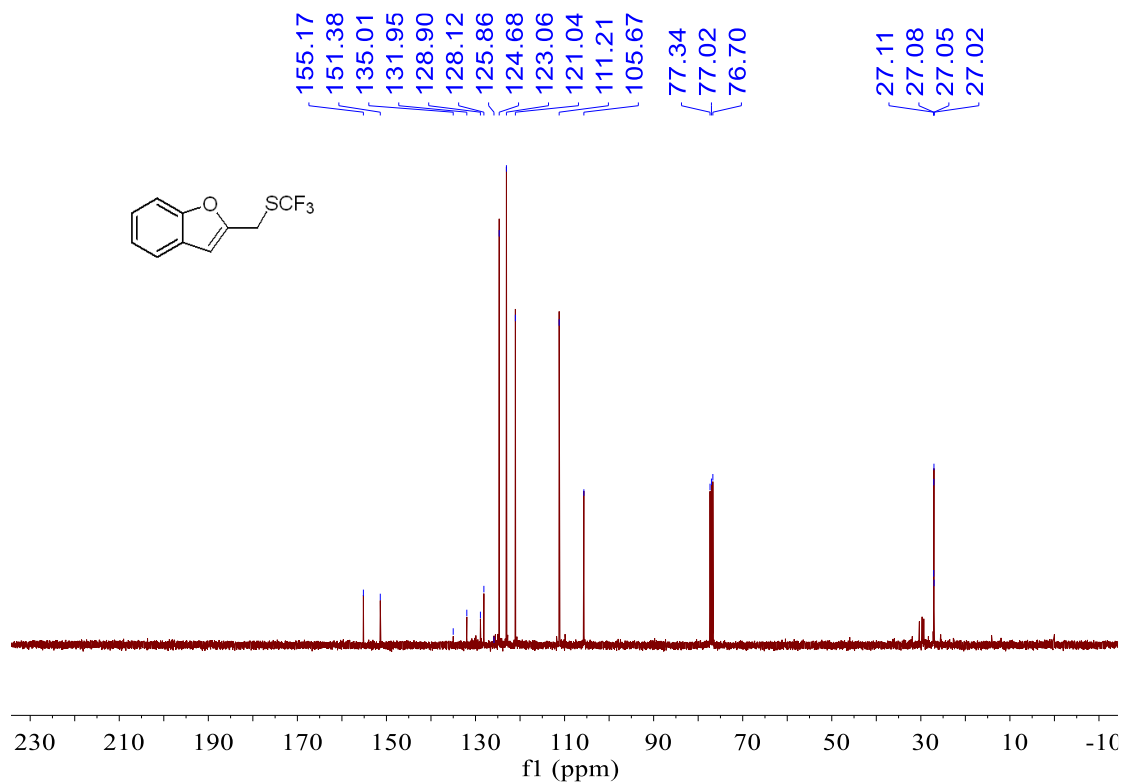

*tert*-butyl 3-(((trifluoromethyl)thio)methyl)-1*H*-indole-1-carboxylate (**2m**)

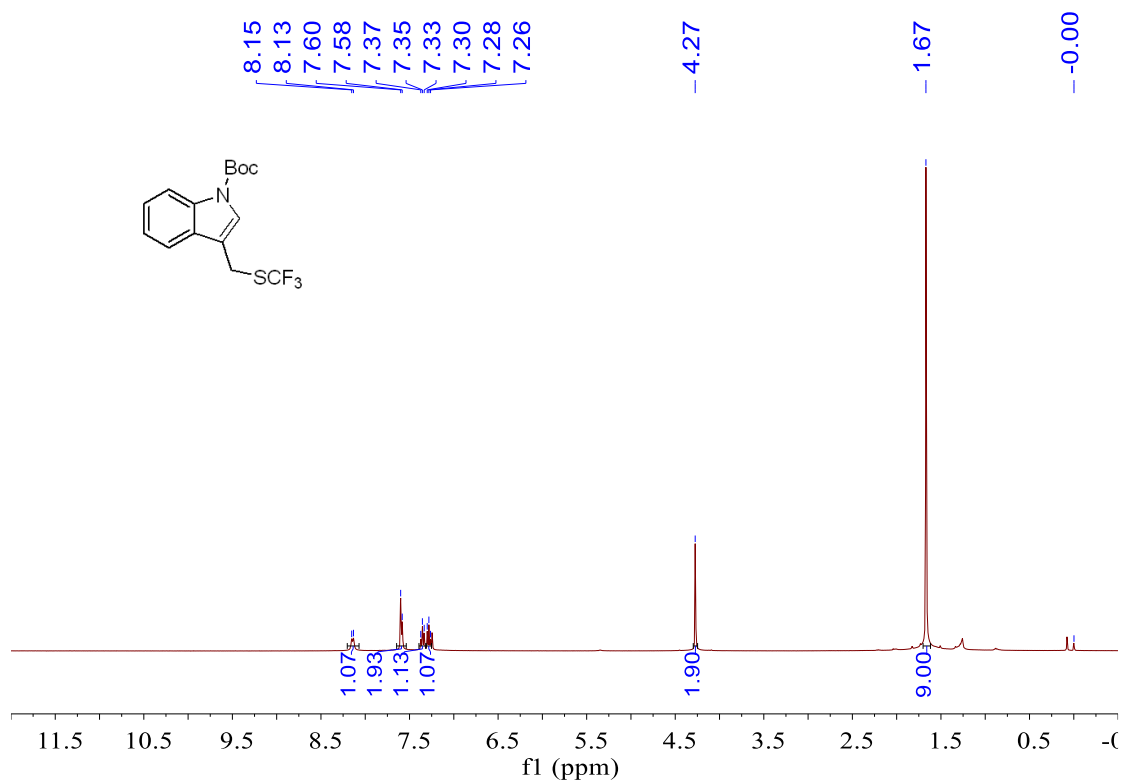

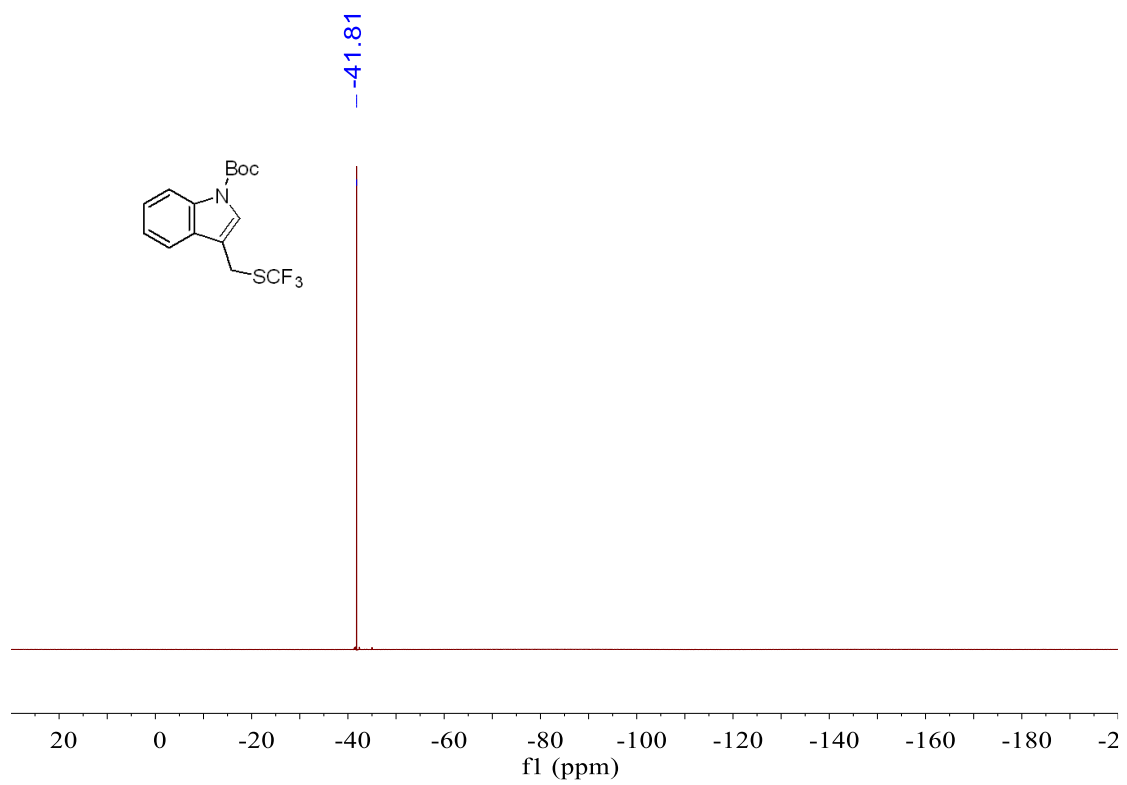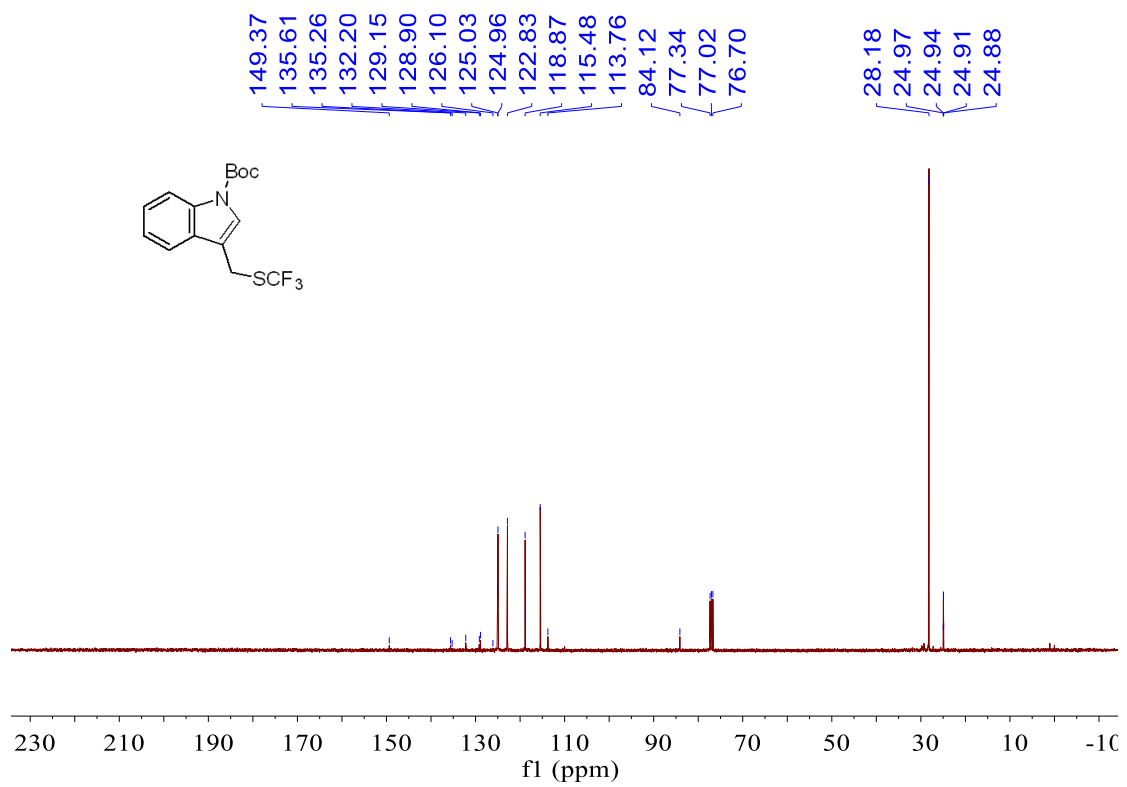



4-methoxy-3,5-dimethyl-2-((trifluoromethyl)thio)methylpyridine (**2n**)

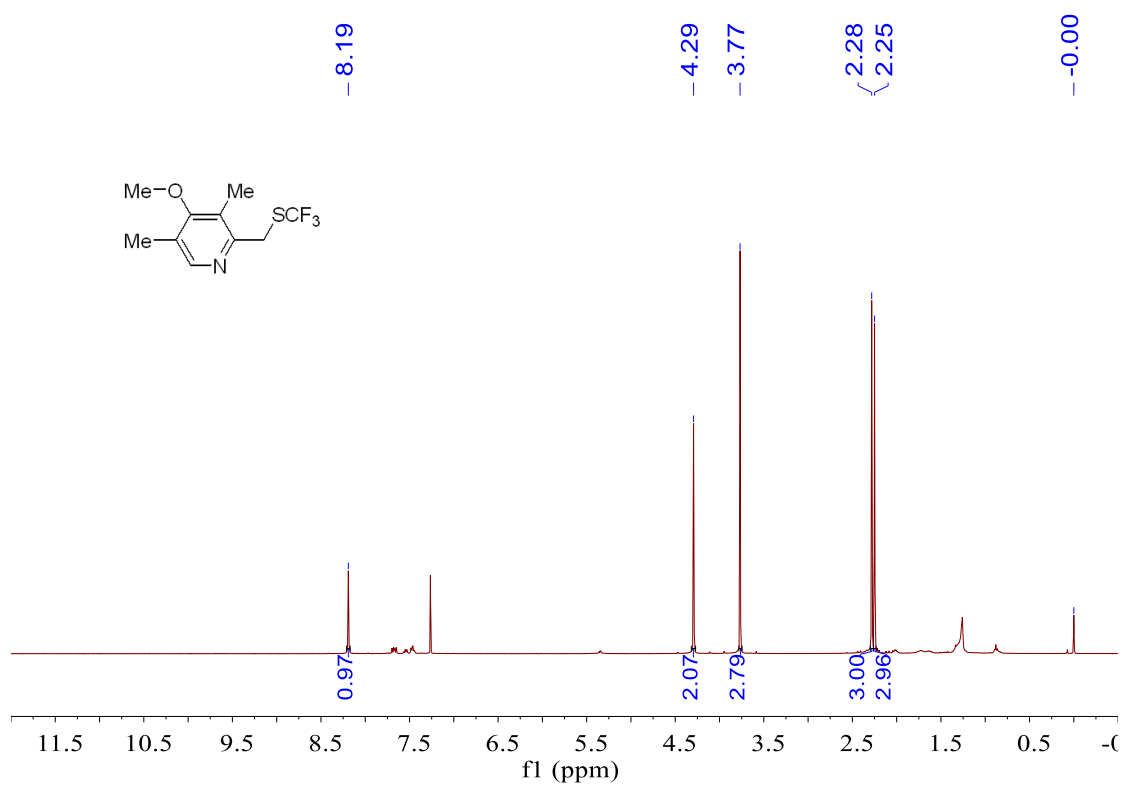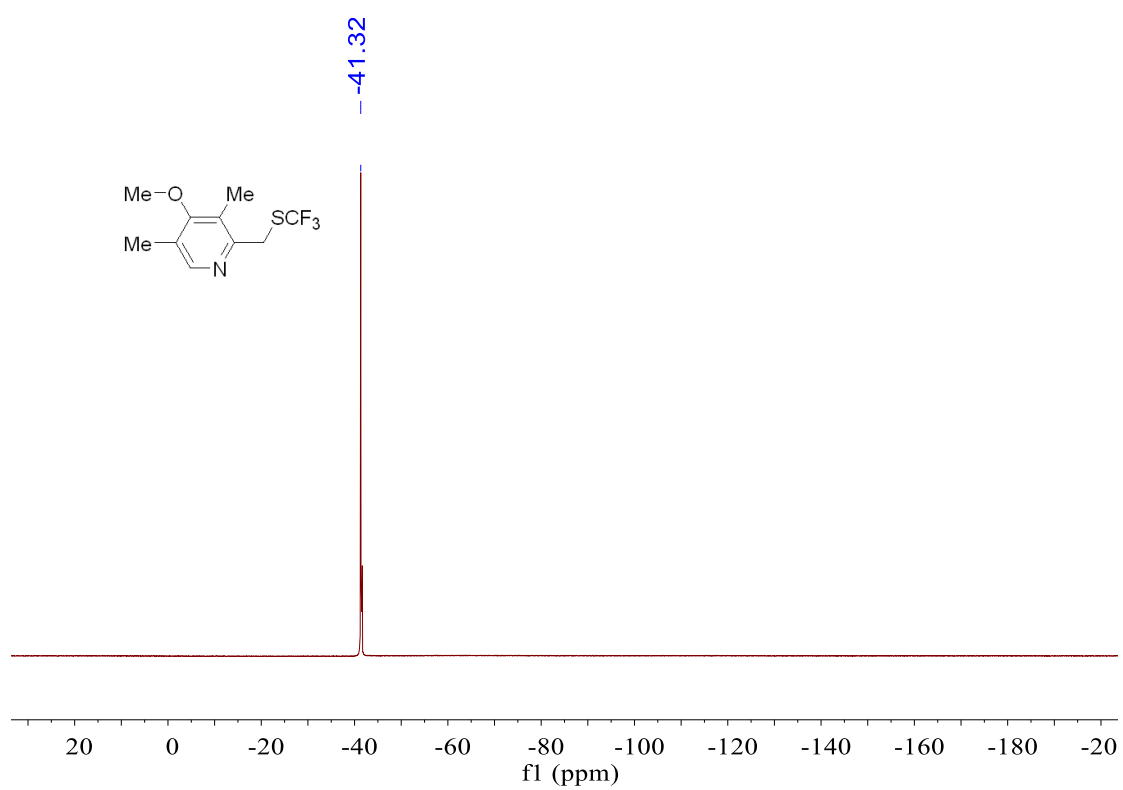

ethyl 6-((trifluoromethyl)thio)hexanoate (**2o**)

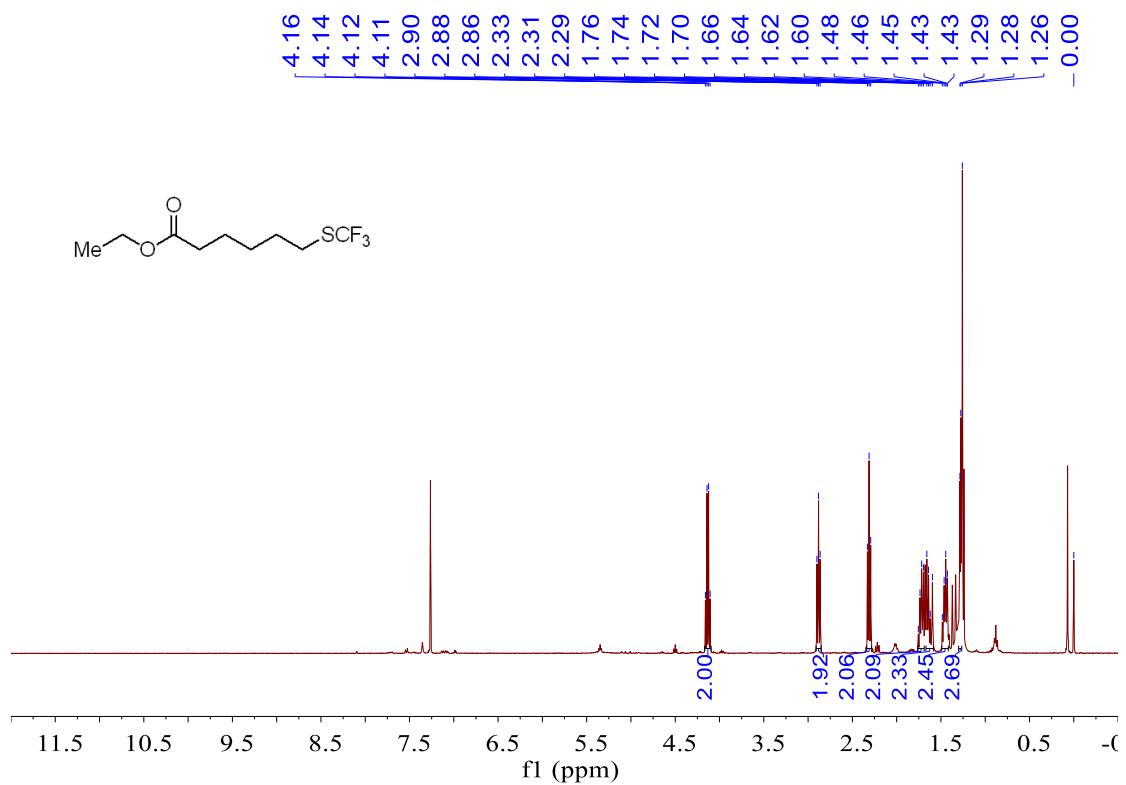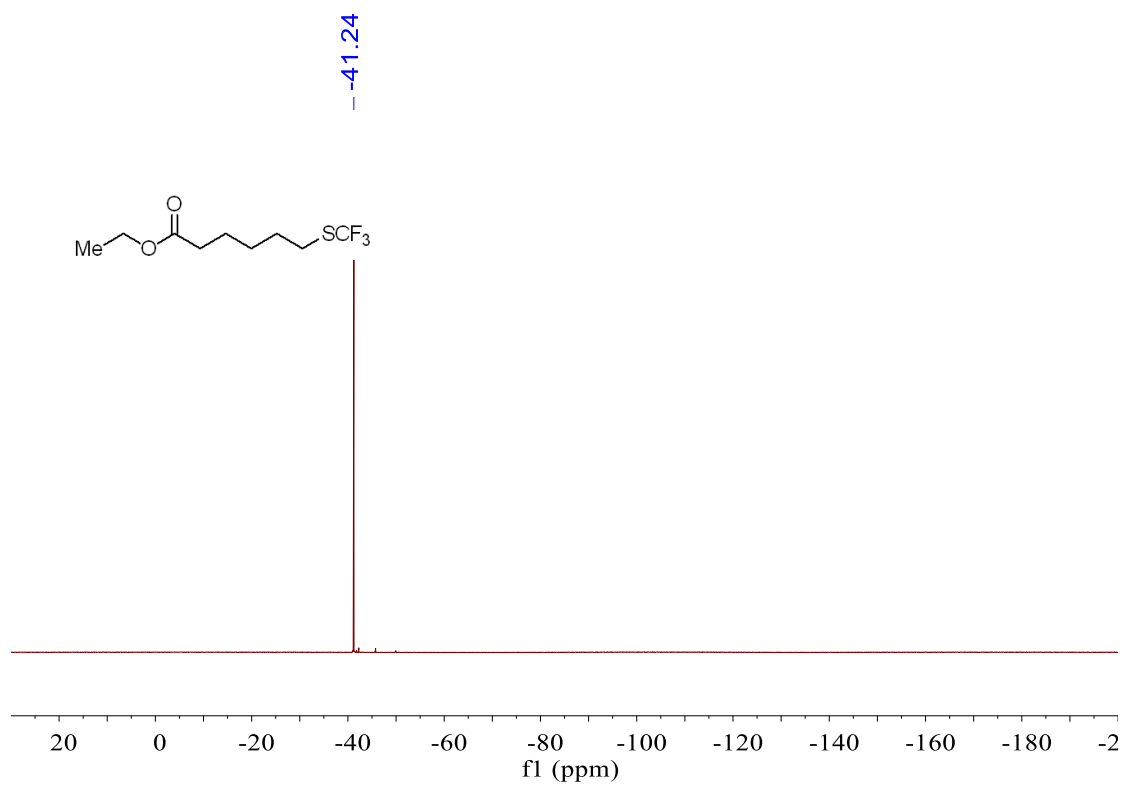

(trifluoromethyl)(undec-10-en-1-yl)sulfane (2p)

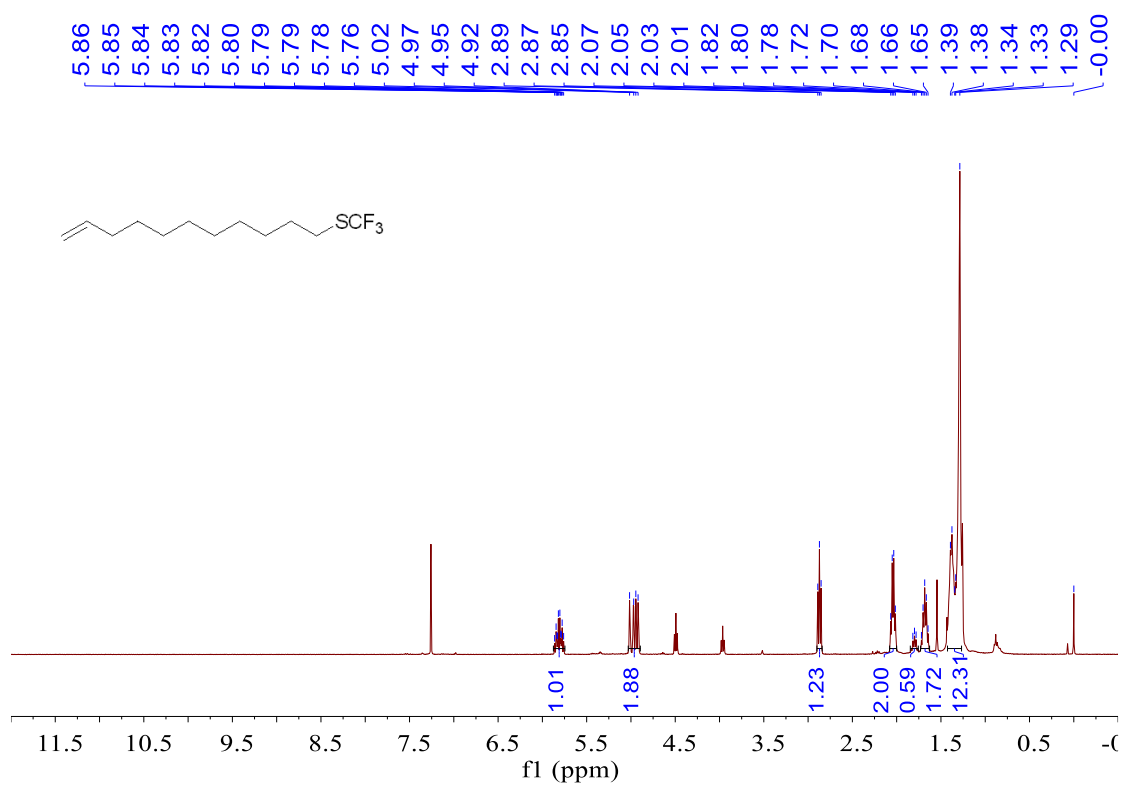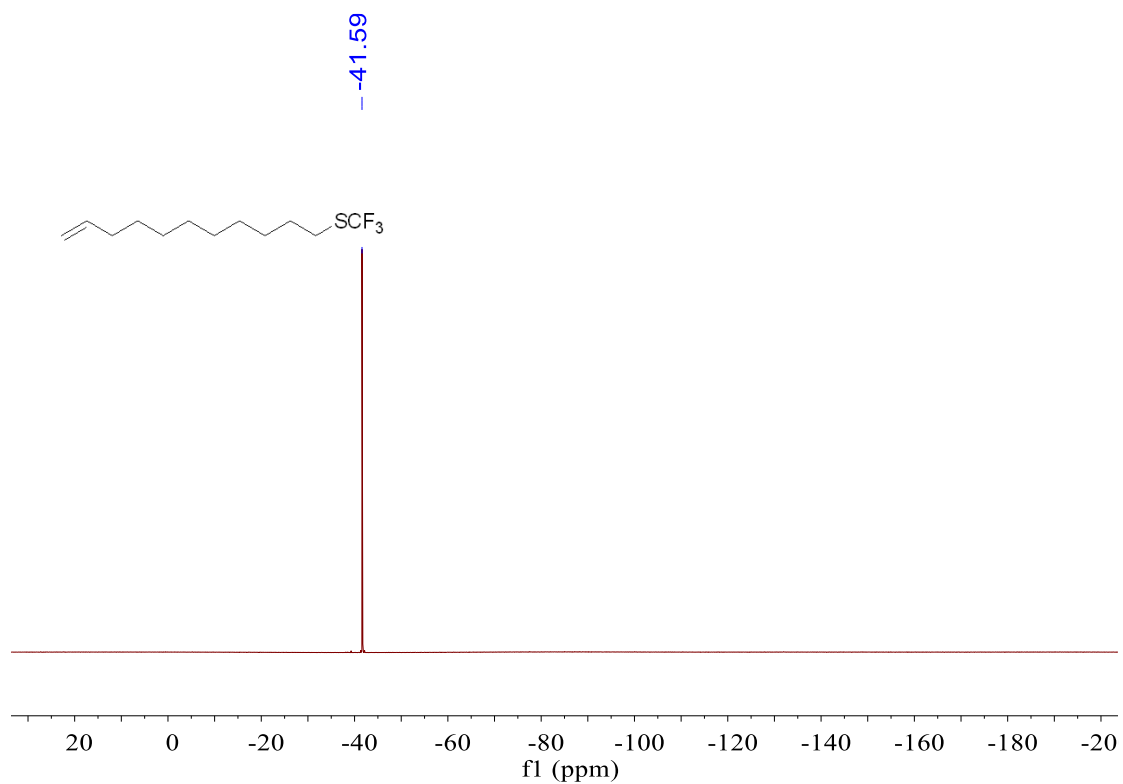

benzhydryl(trifluoromethyl)sulfane (2q)

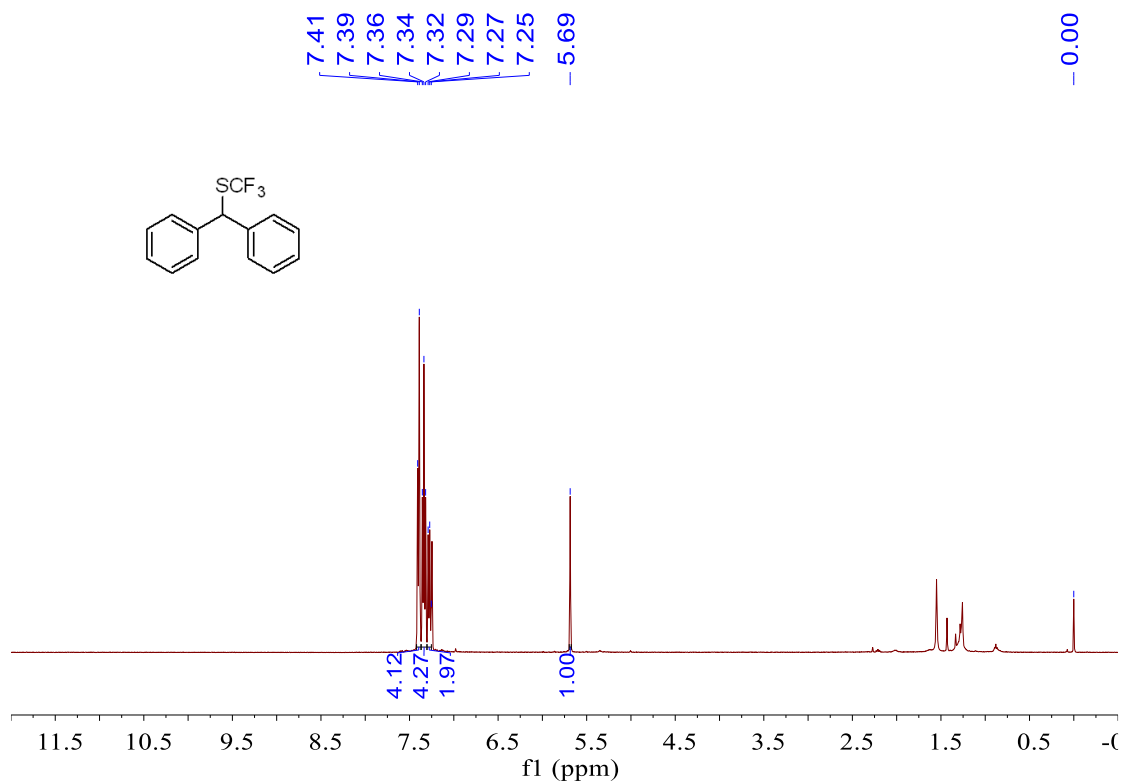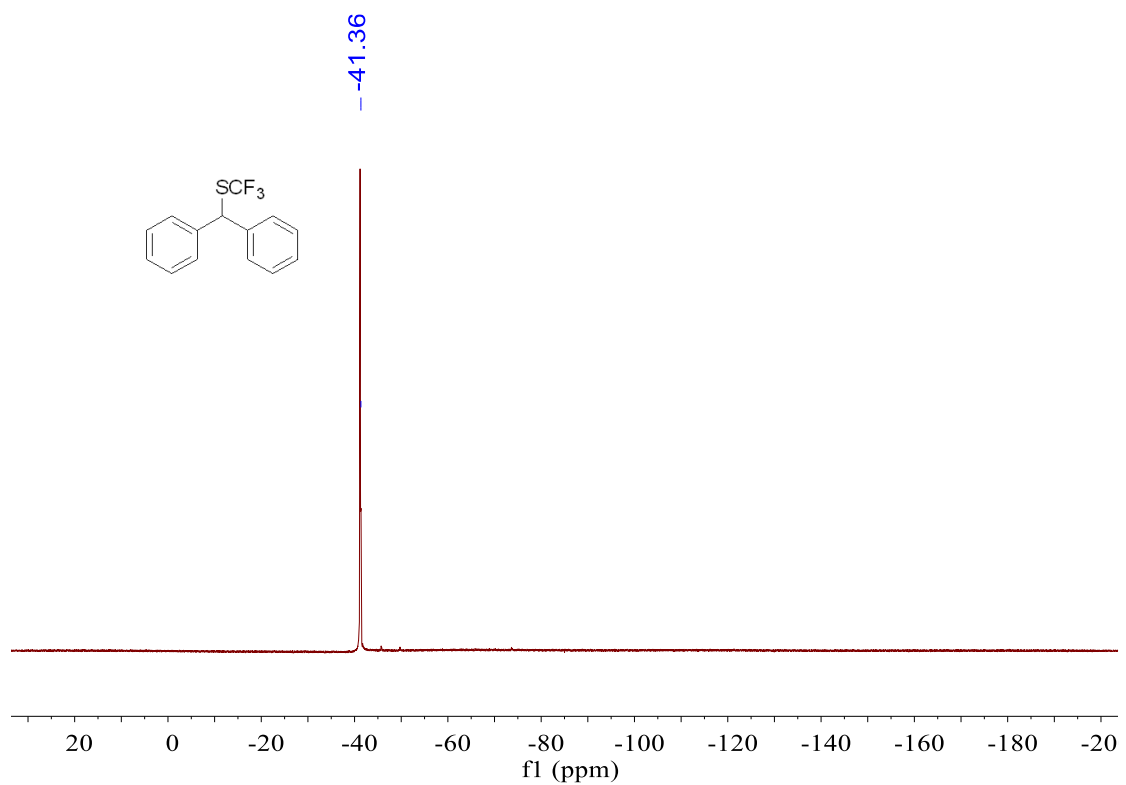

(4-phenylbutan-2-yl)(trifluoromethyl)sulfane (**2r**)

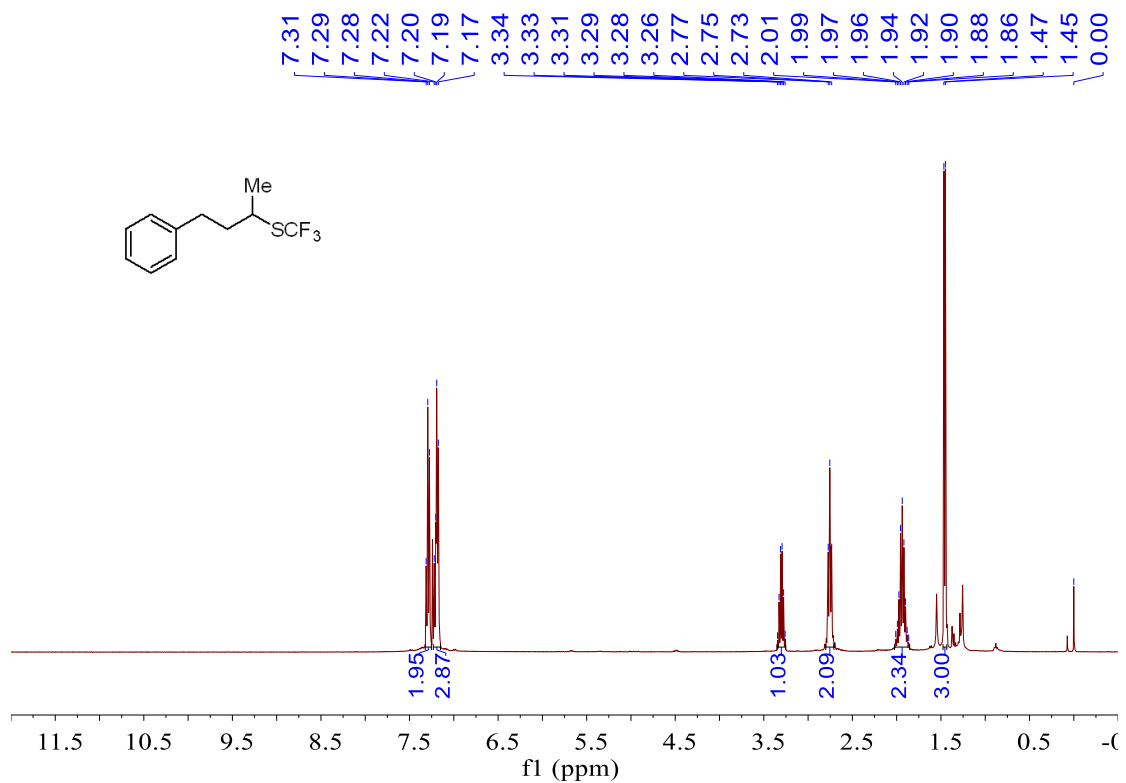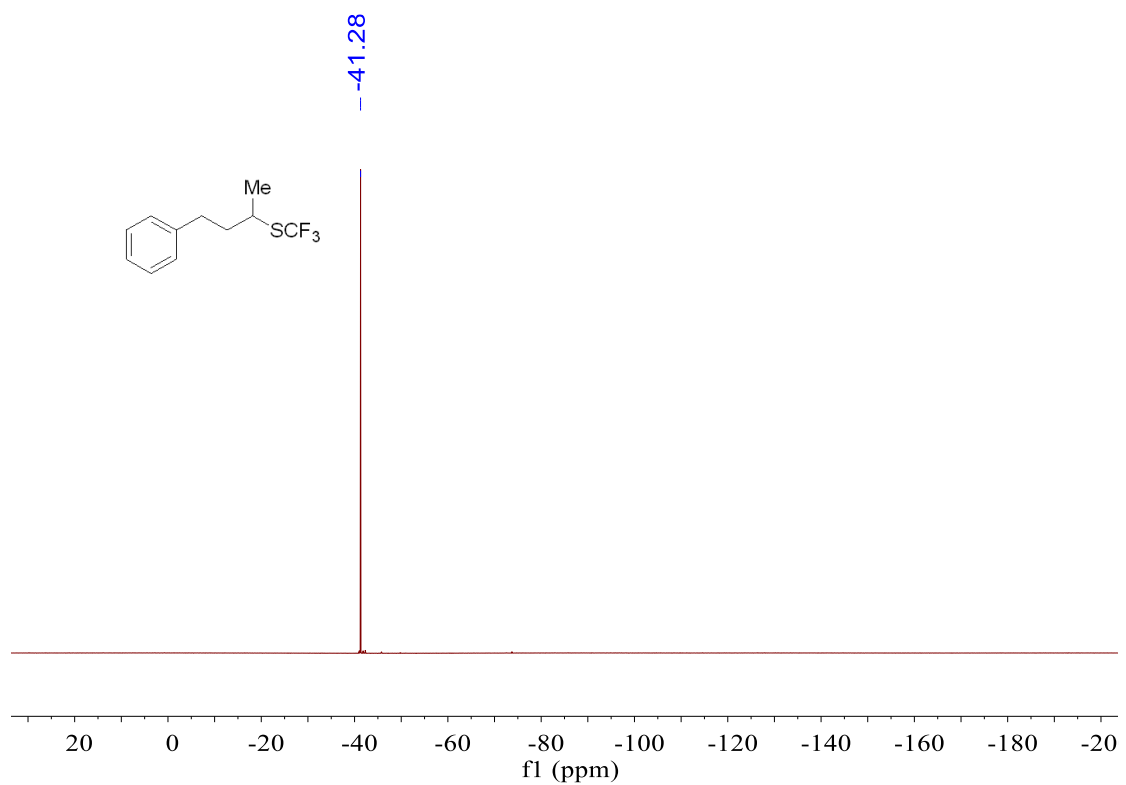

*(1s,3r,5R,7S)*-3-(2-((trifluoromethyl)thio)ethyl)adamantan-1-ol (**3a**)

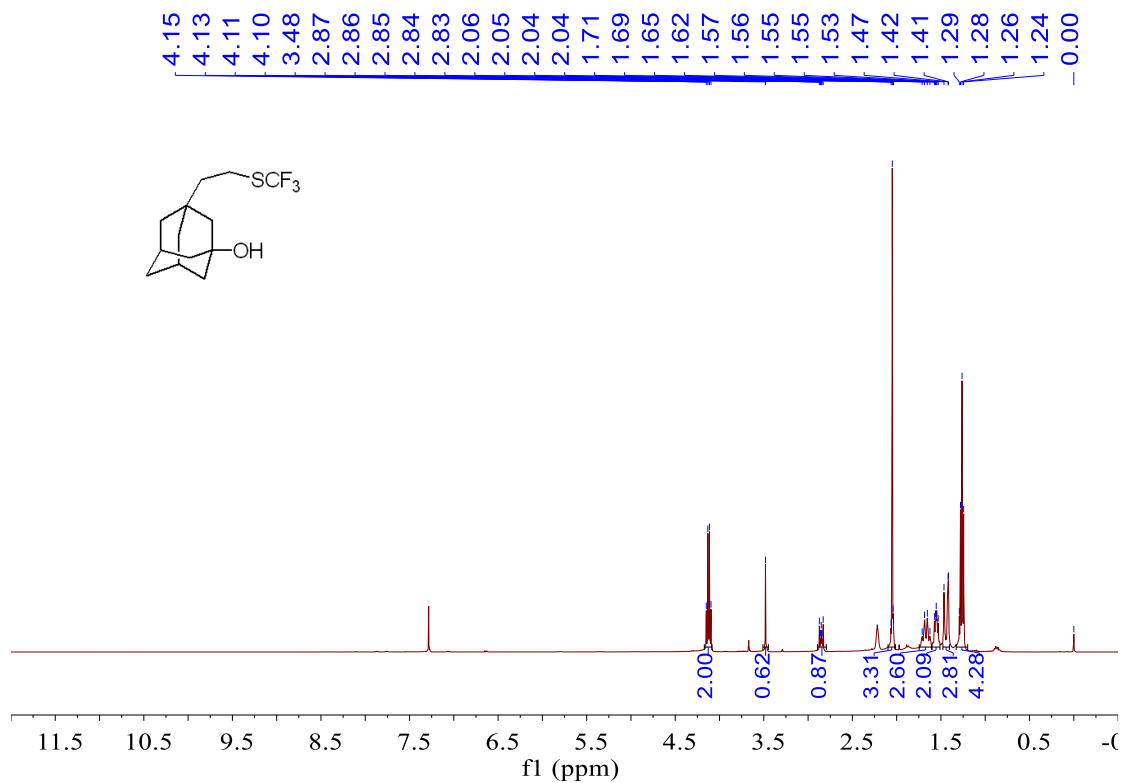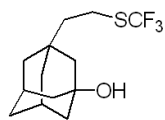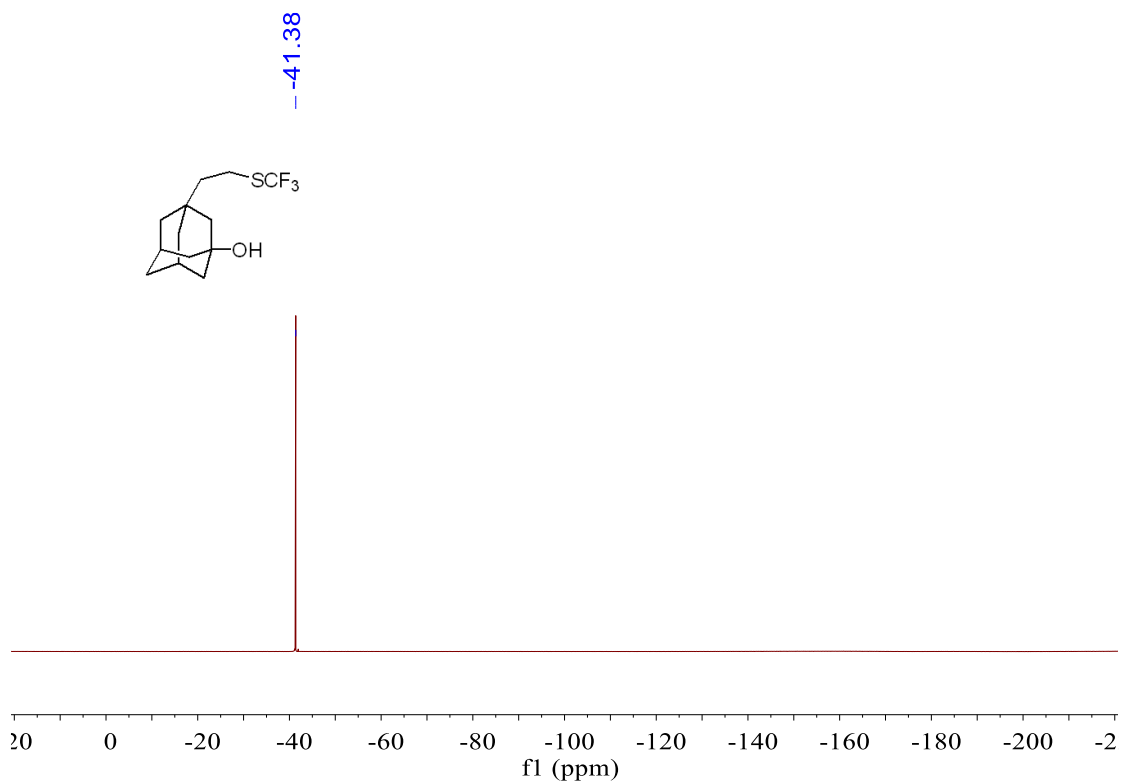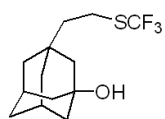

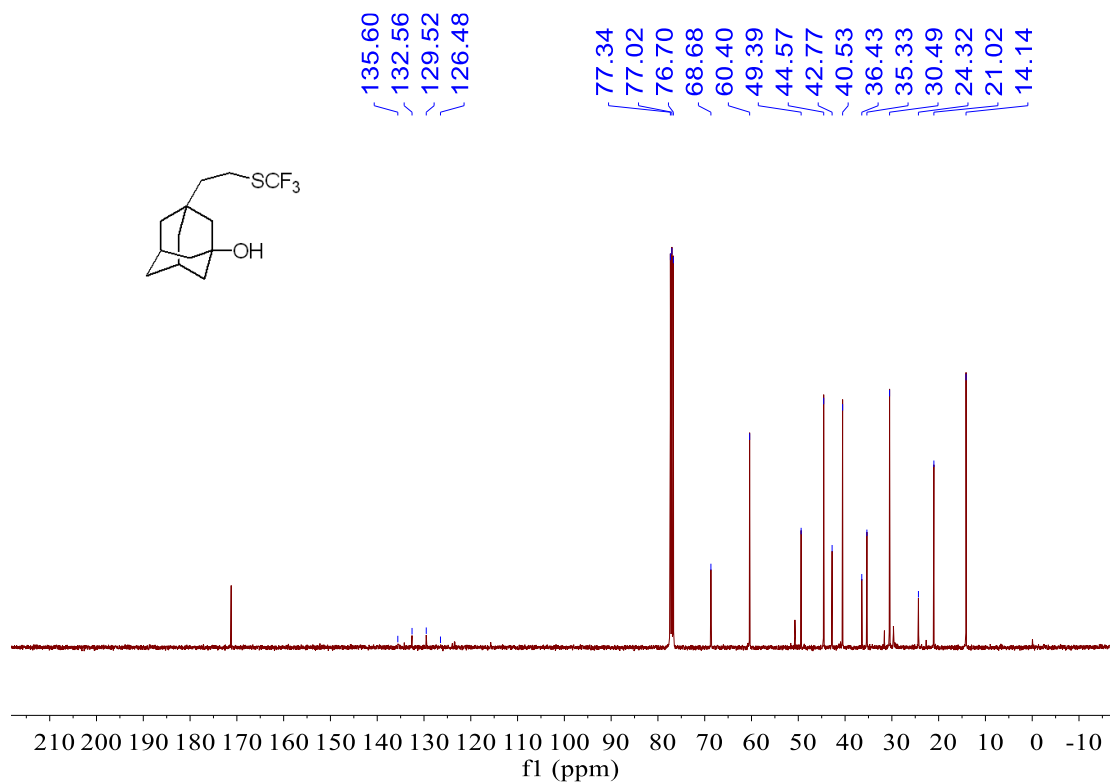

(10R,13S,17S)-11-hydroxy-10,13-dimethyl-17-(2-((trifluoromethyl)thio)acetyl)-1,2,6,7,8,9,10,11,12,13,14,15,16,17-tetradecahydro-3H-cyclopenta[a]phenanthren-3-one. (**3b**)

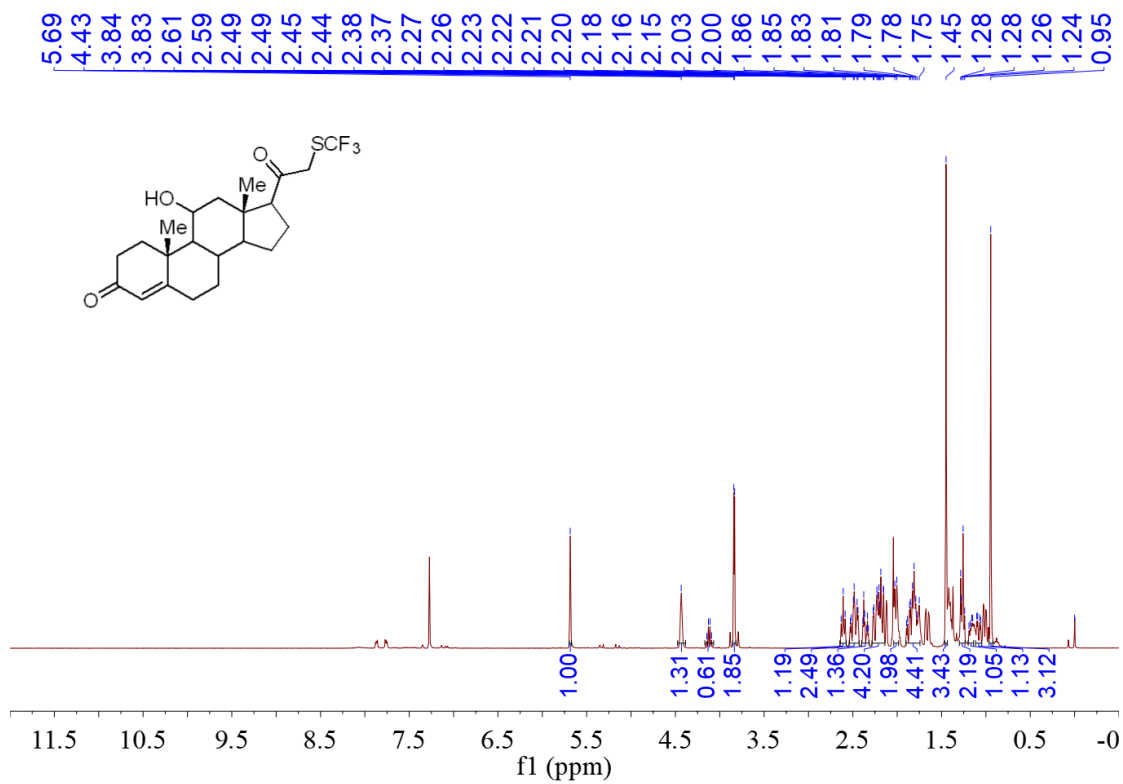

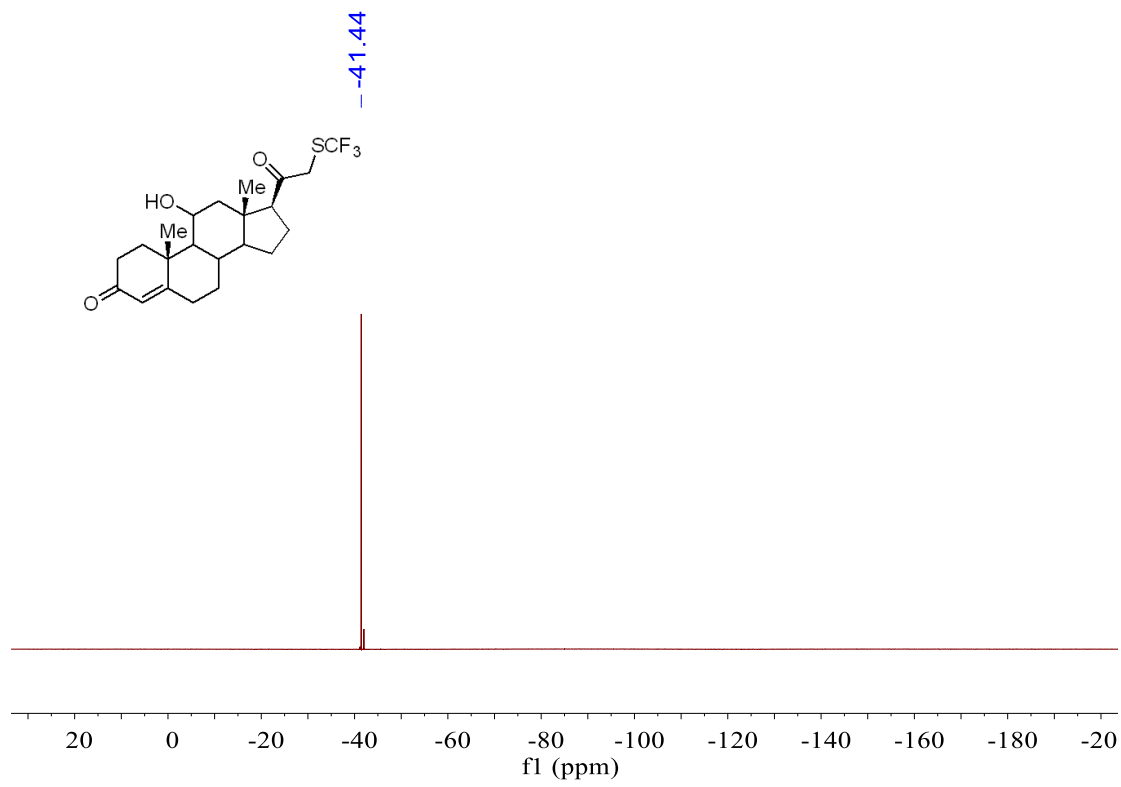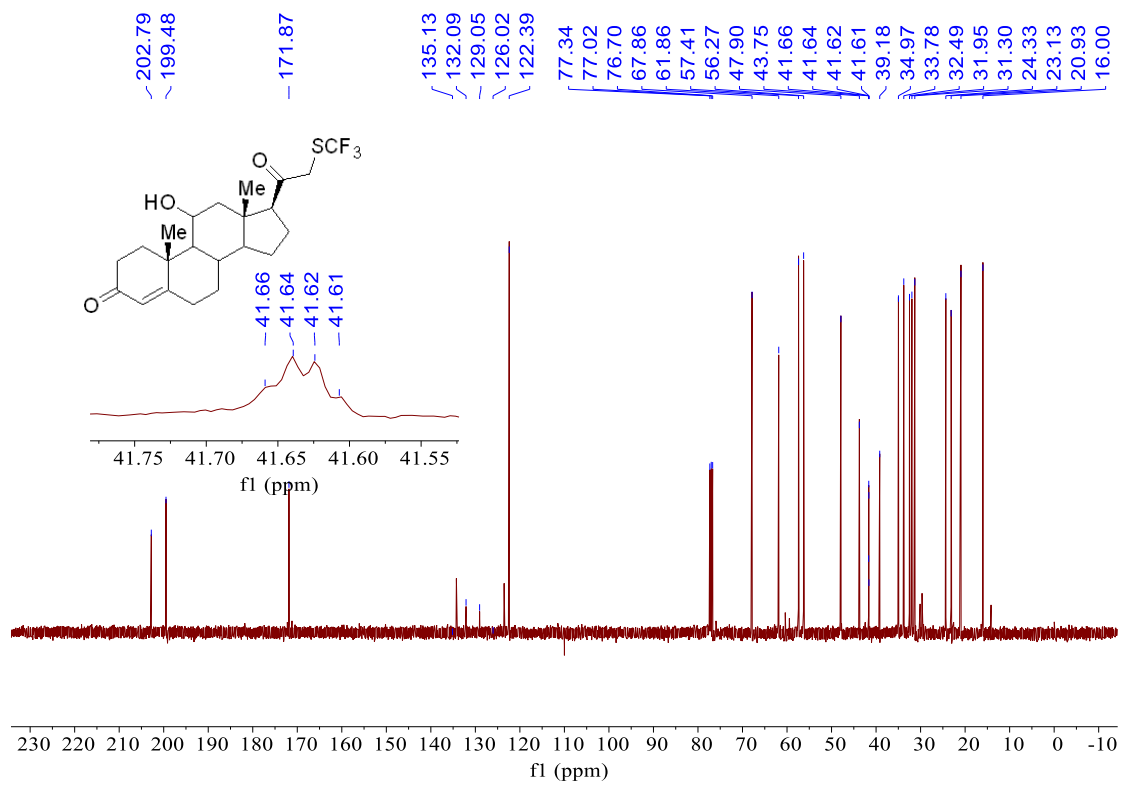



5-(((trifluoromethyl)thio)methyl)benzo[d][1,3]dioxole (**4a**)

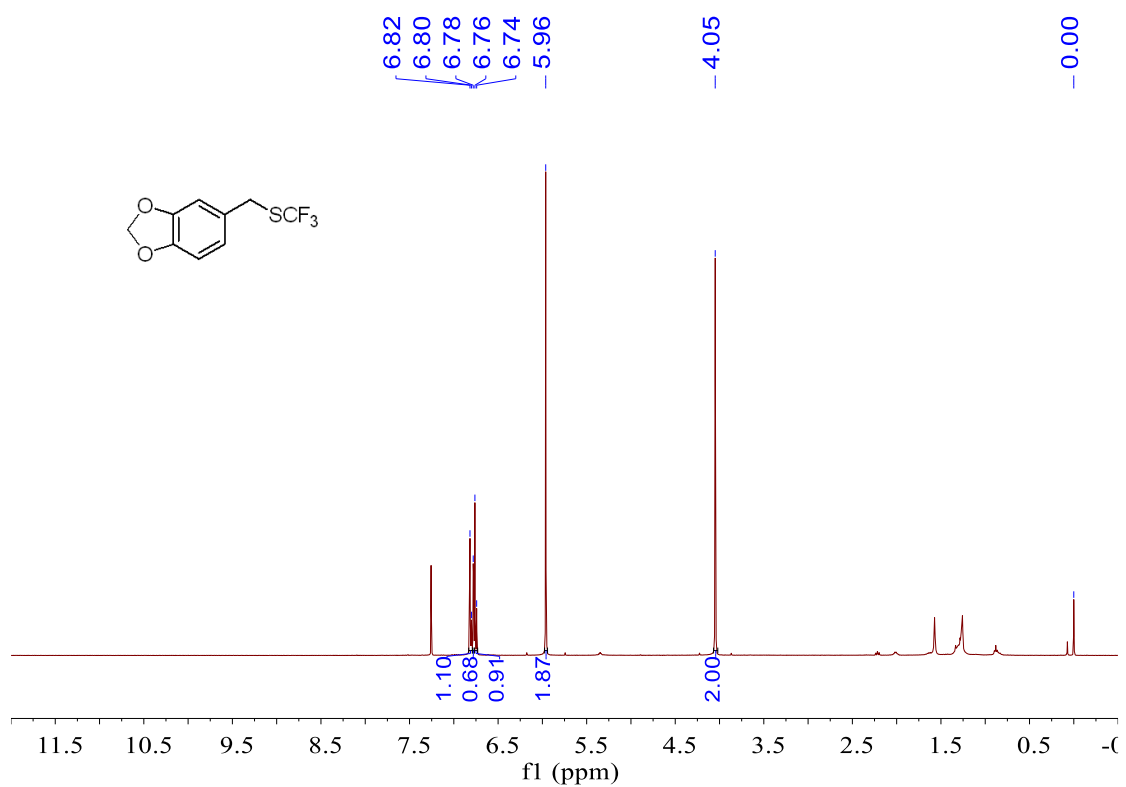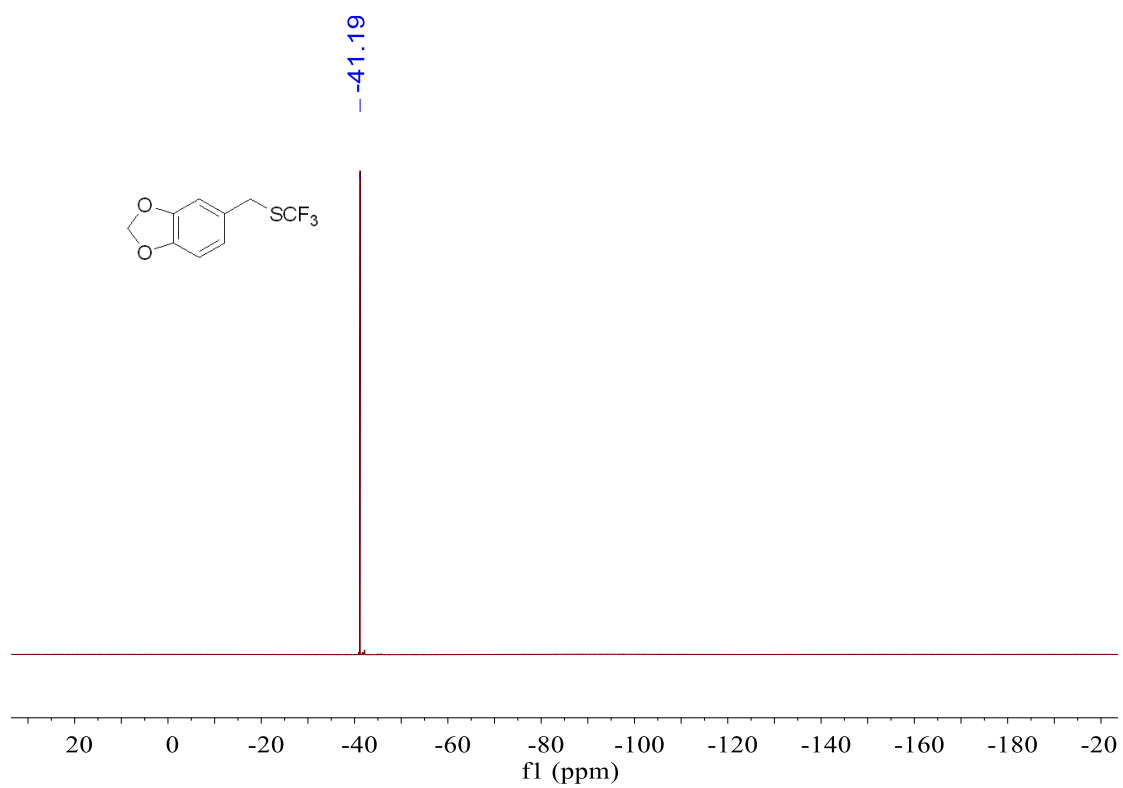

cinnamyl(trifluoromethyl)sulfane (**4b**)

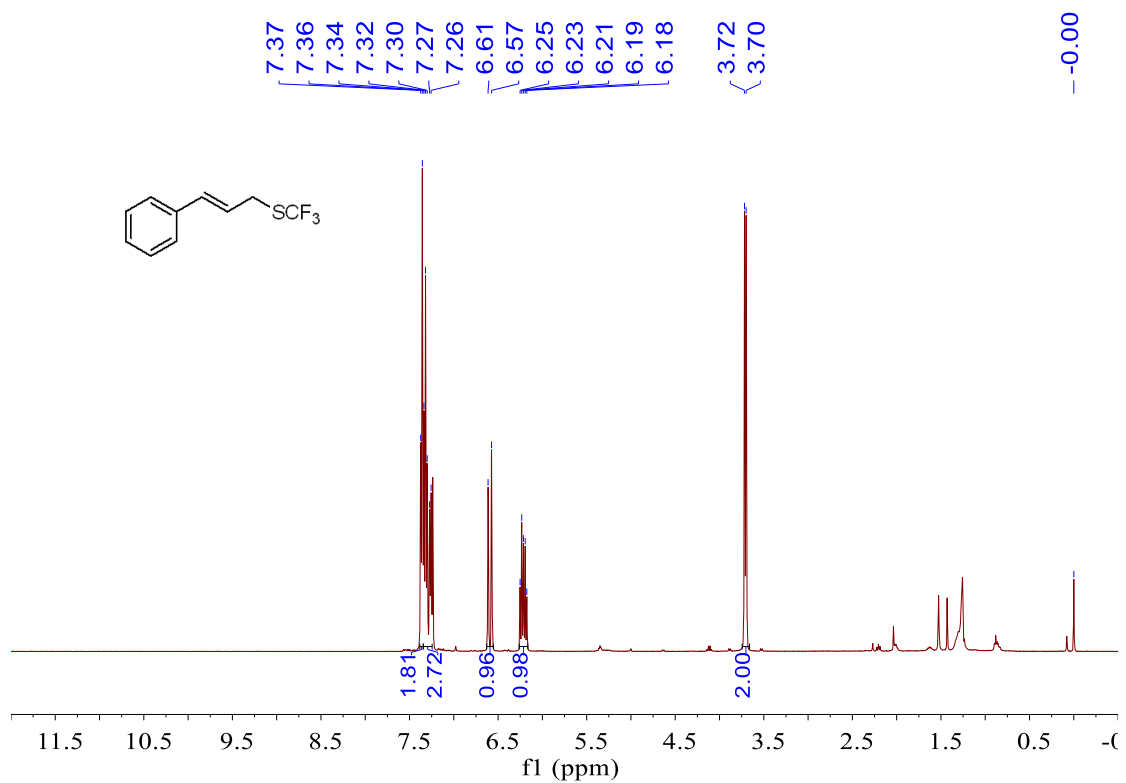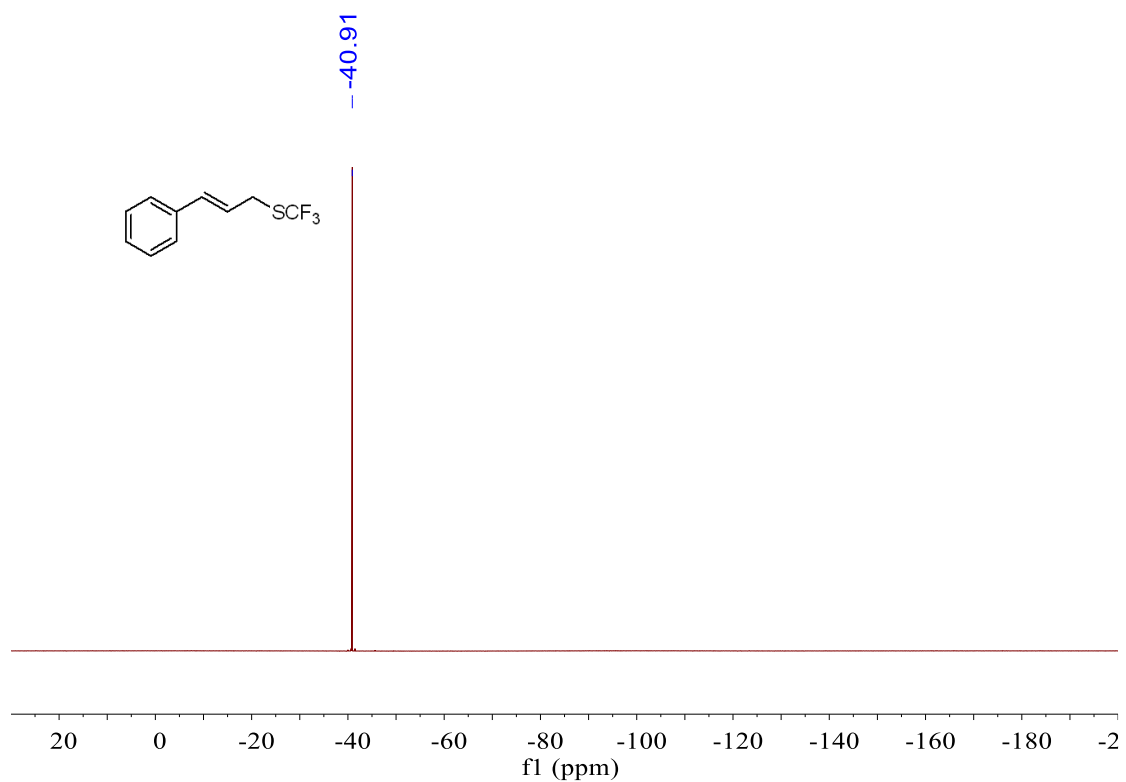

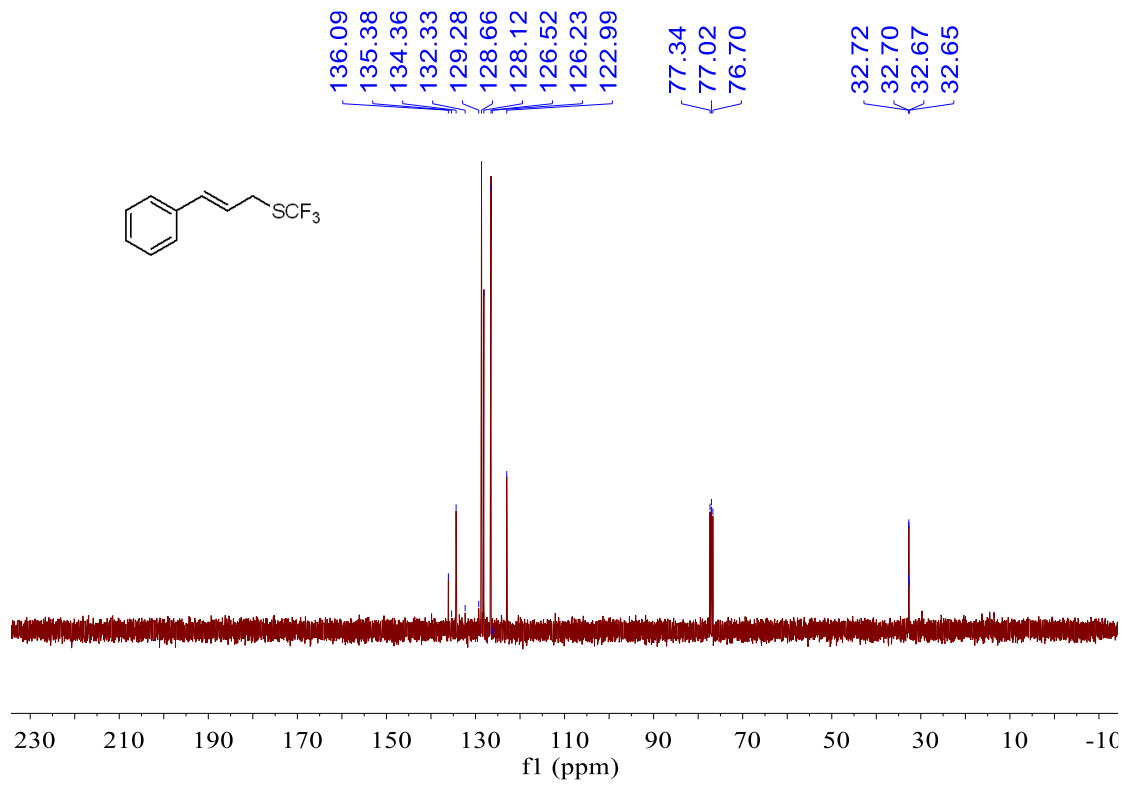

*(S)*-2-(6-methoxynaphthalen-2-yl)propyl(trifluoromethyl)sulfane (**4c**)

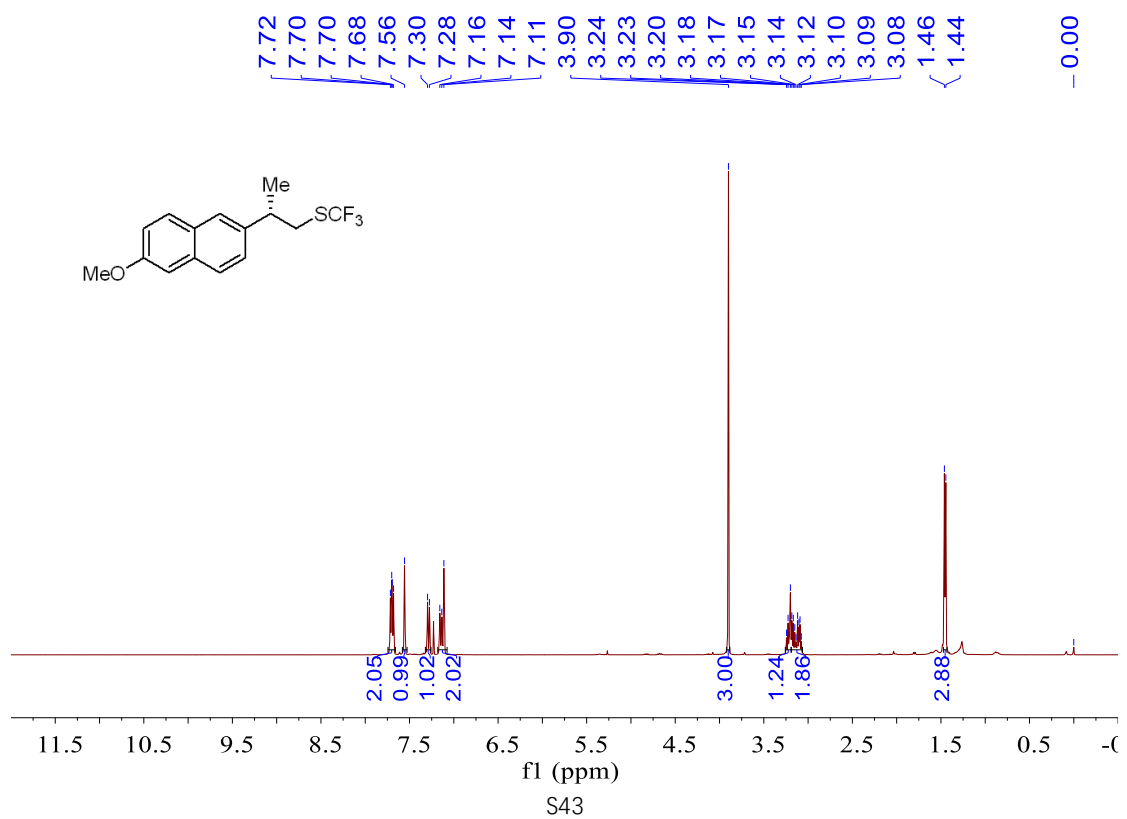

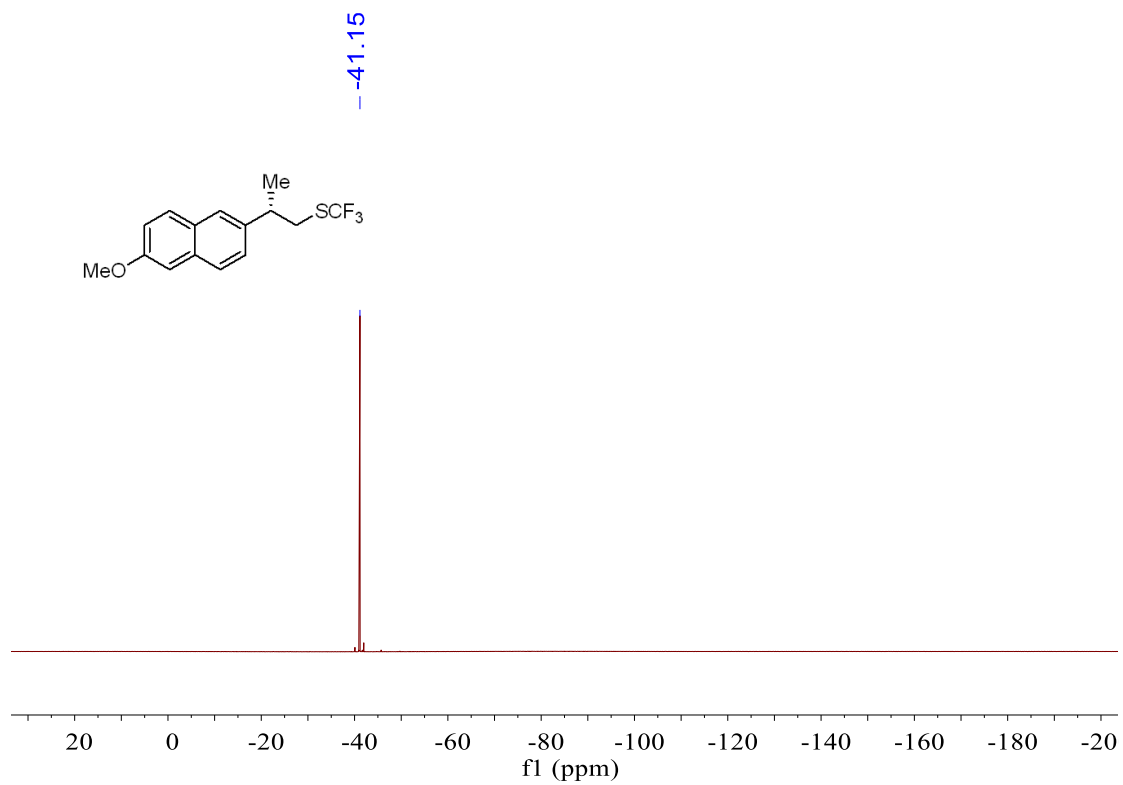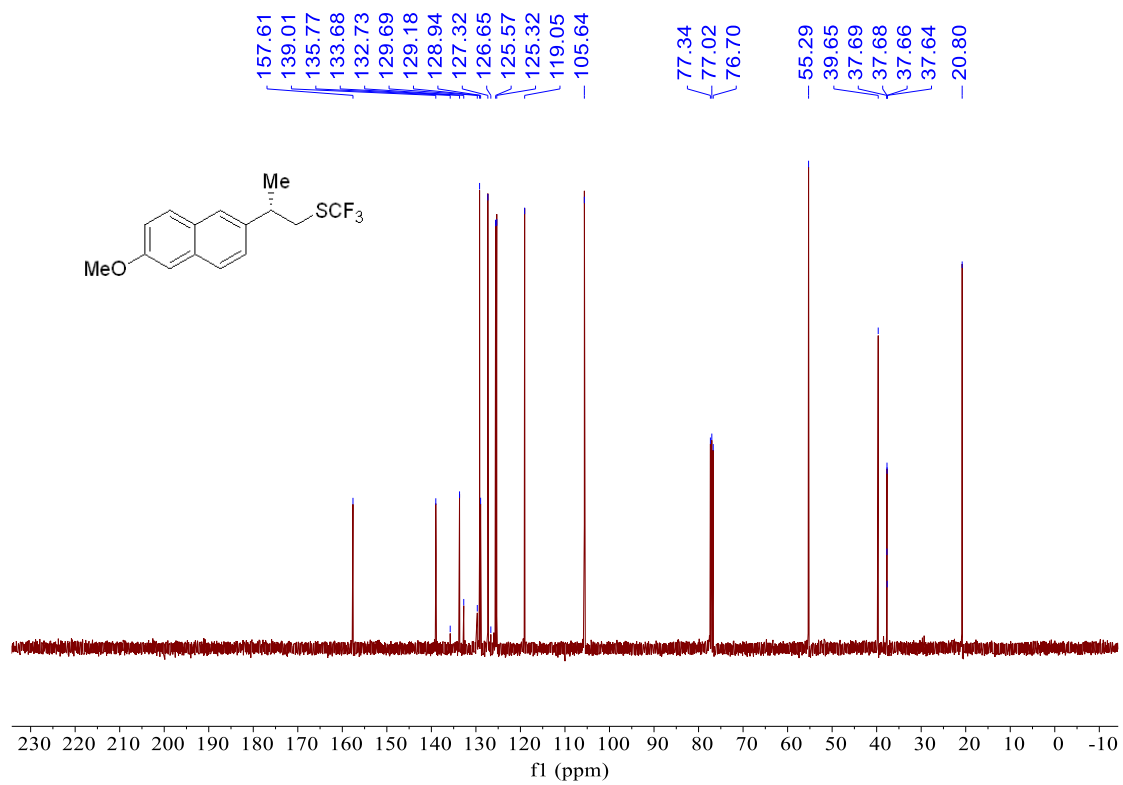

(2-(2-fluoro-[1,1'-biphenyl]-4-yl)propyl)(trifluoromethyl)sulfane (**4d**)

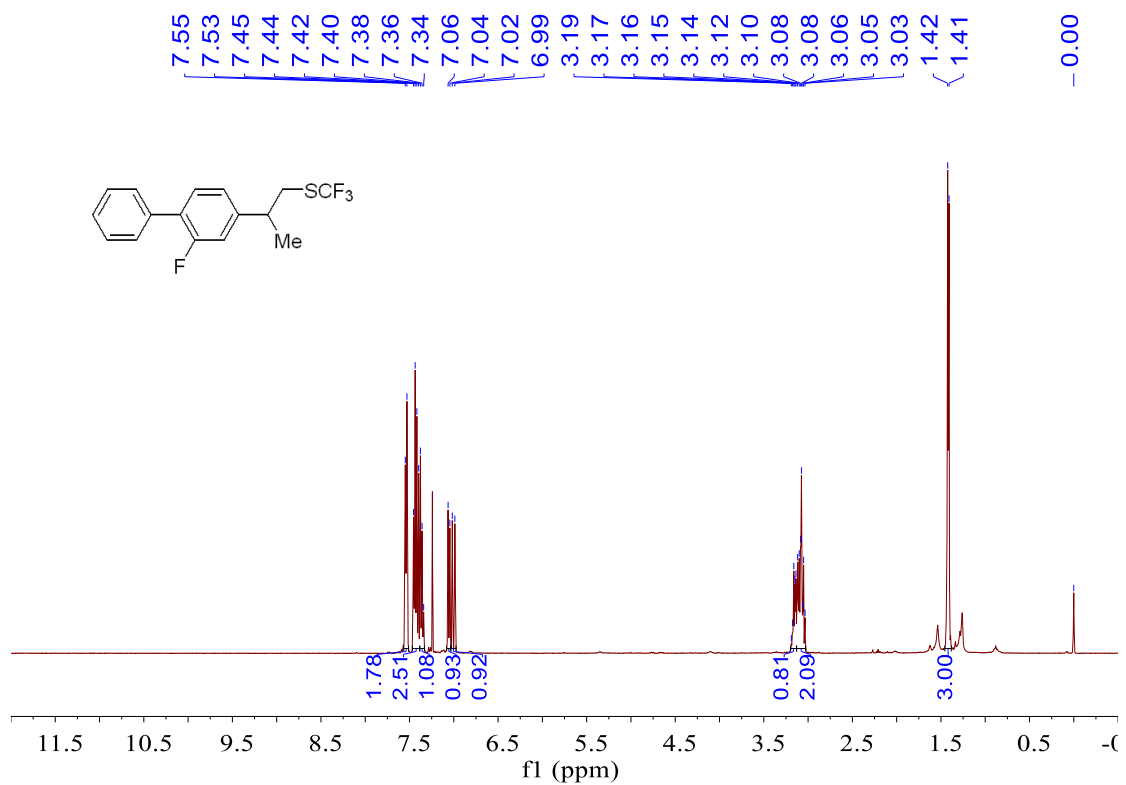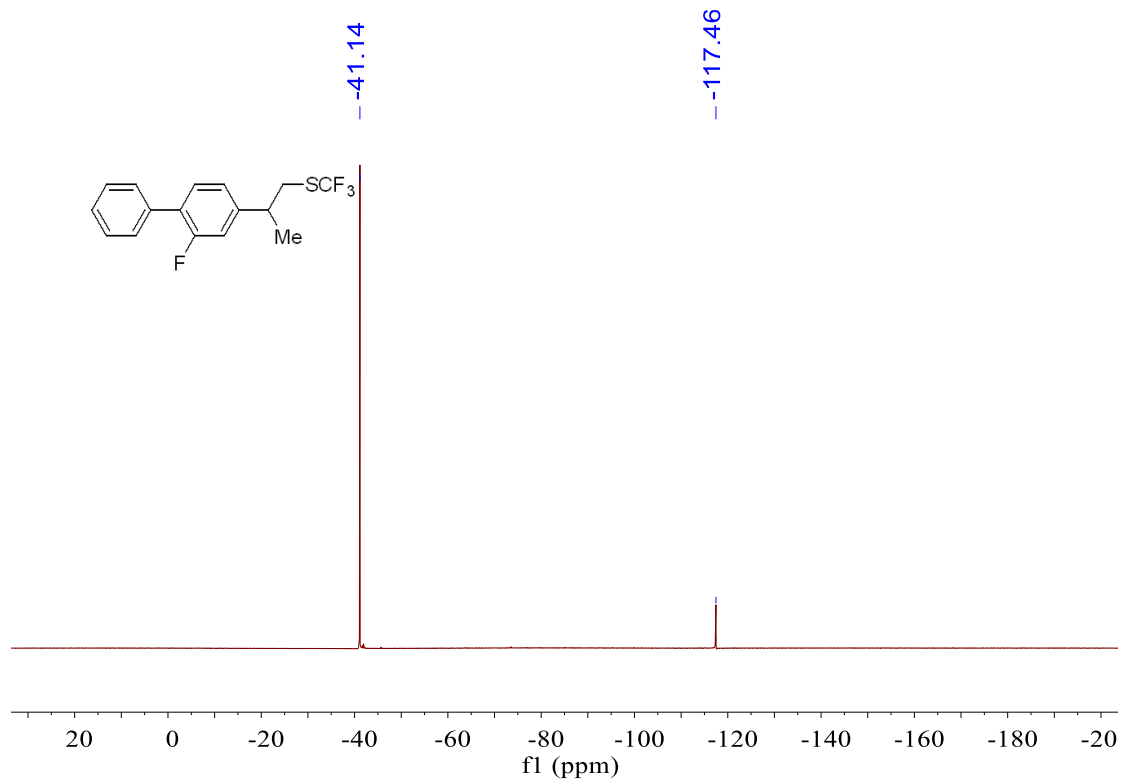

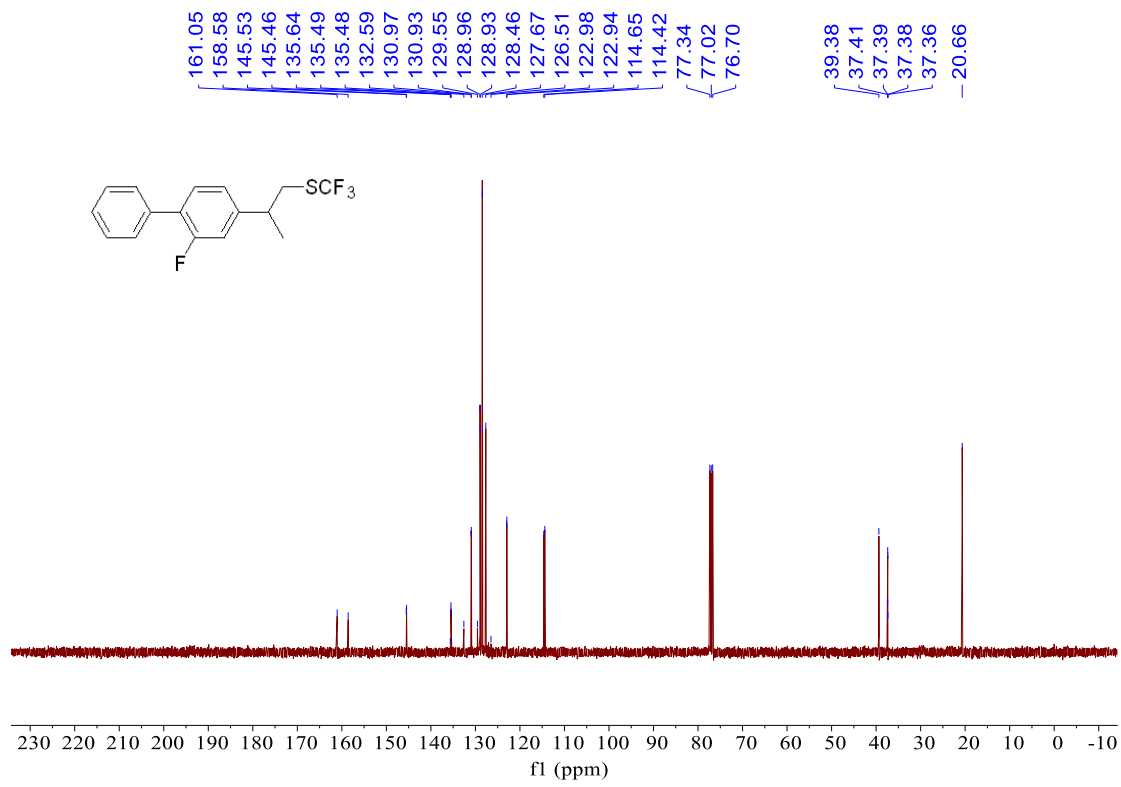

*methyl N-((benzyloxy)carbonyl)-S-(trifluoromethyl)cysteinate (4e)*

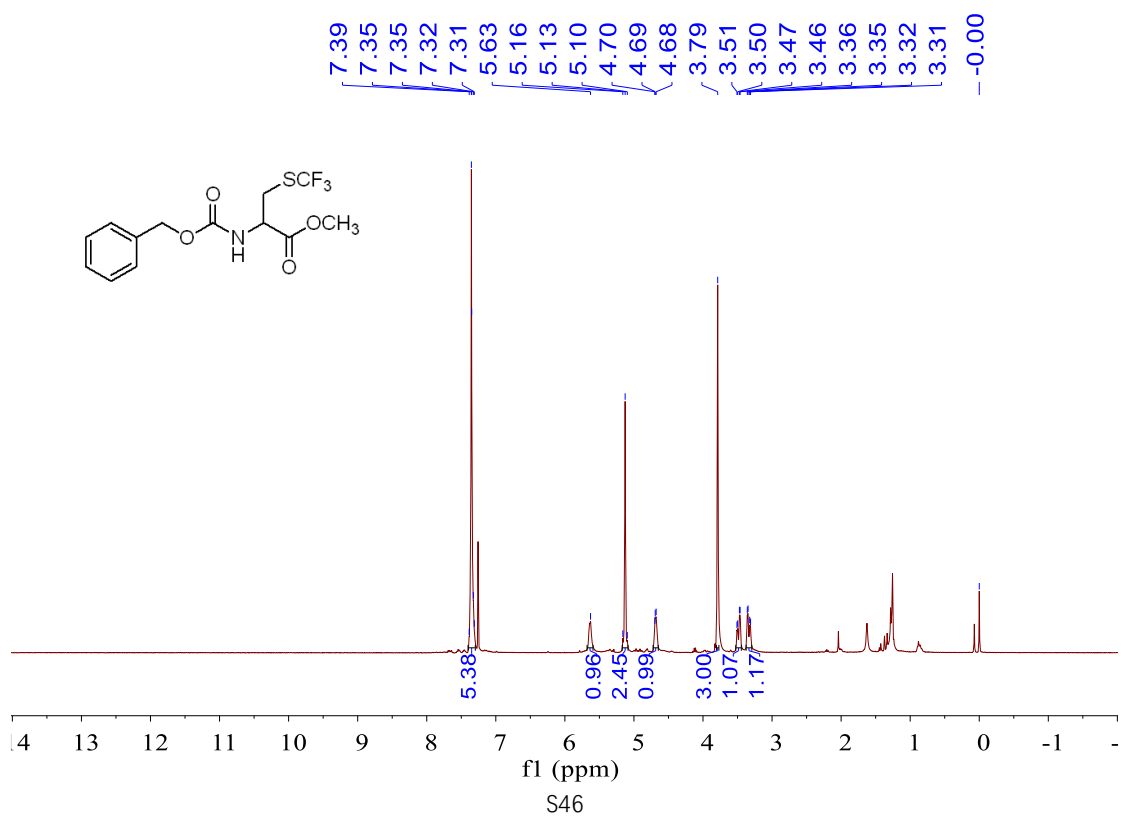

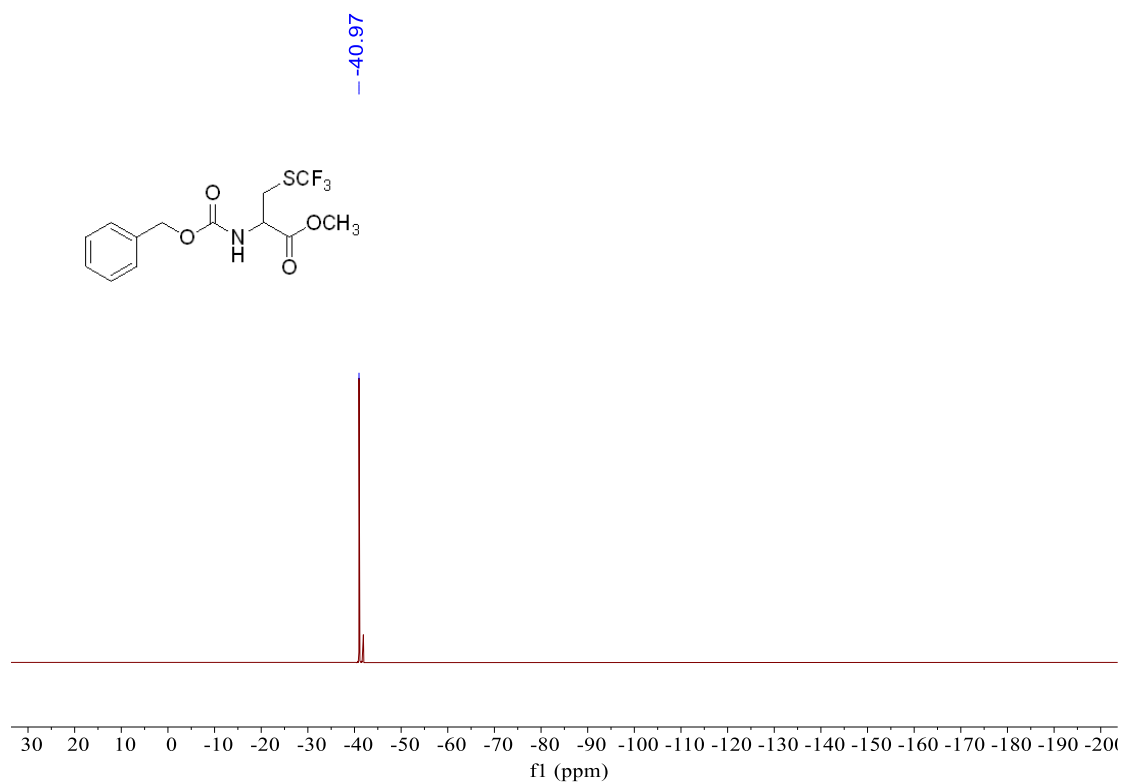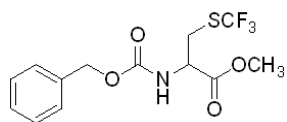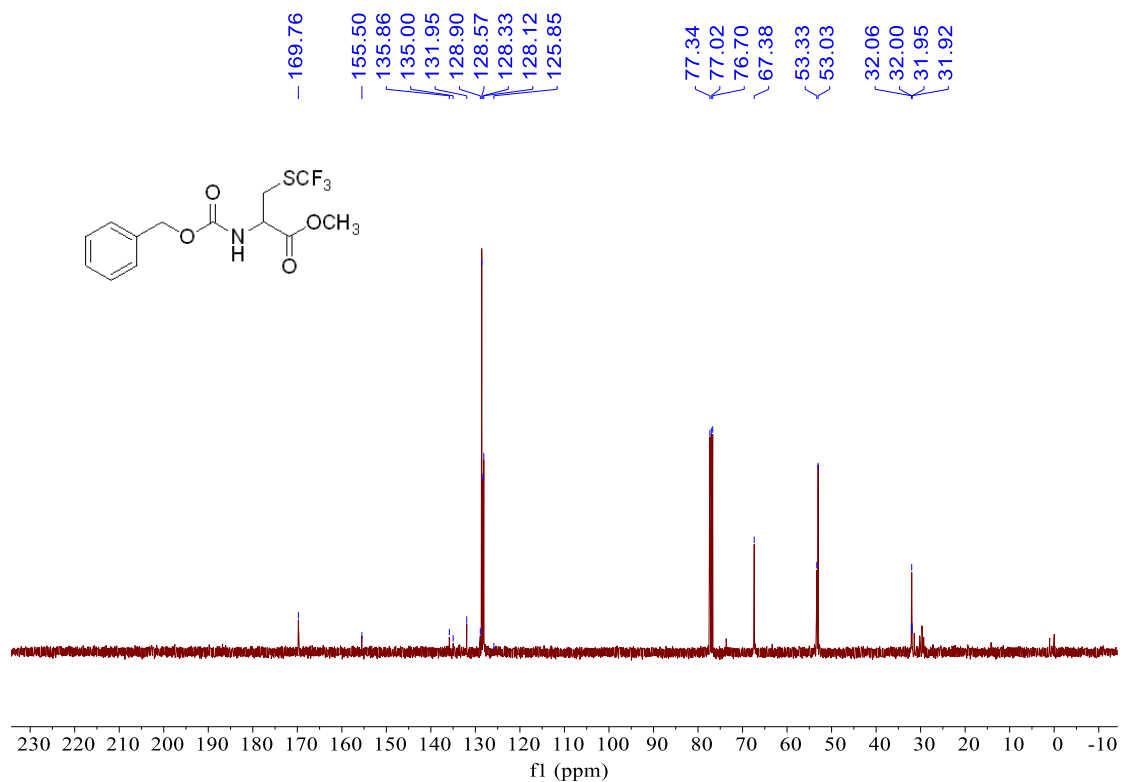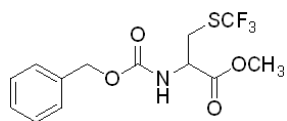

(Z)-2-(4-(4-chloro-1,2-diphenylbut-1-en-1-yl)phenoxy)ethyl(trifluoromethyl)sulfane (**4f**)

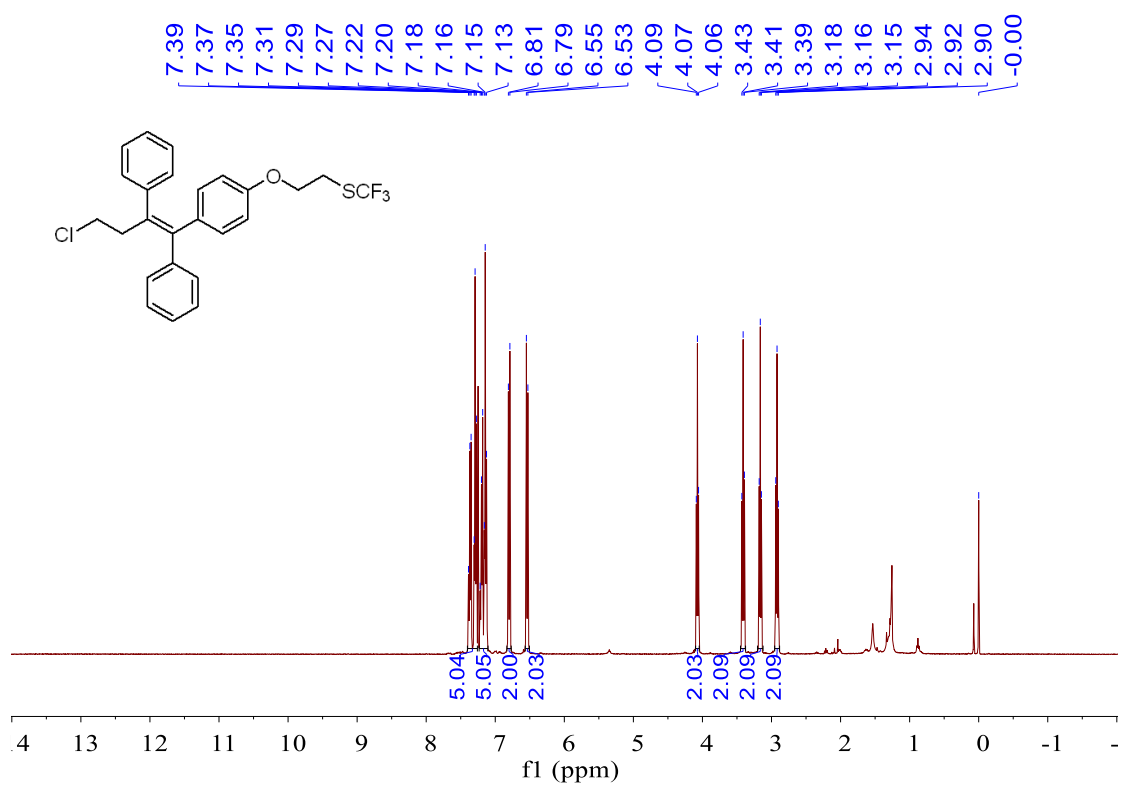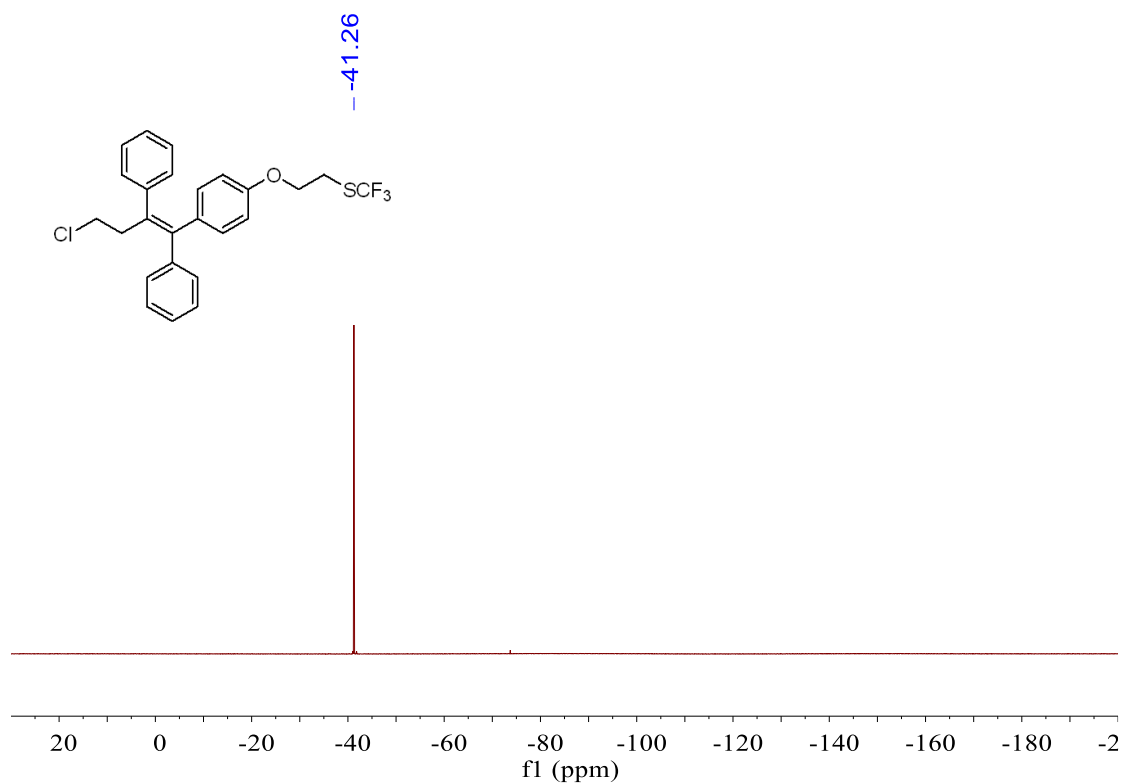



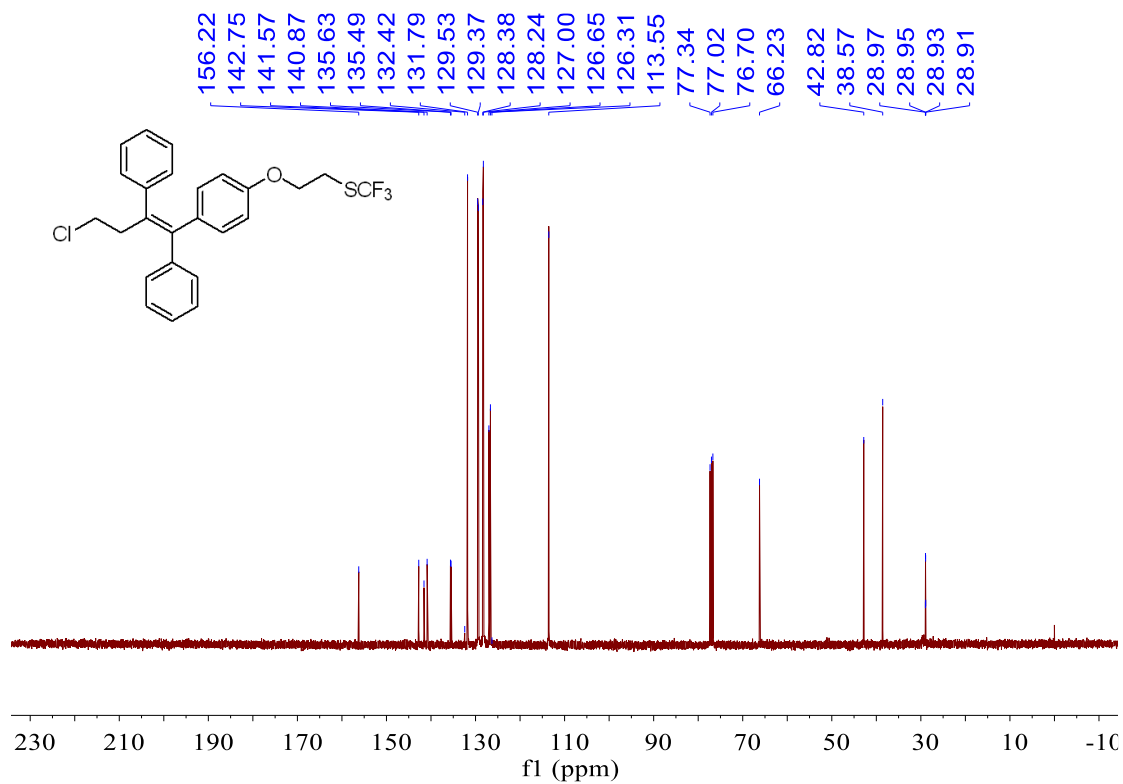

2,3-dimethoxy-5-methyl-6-(10-((trifluoromethyl)thio)decyl)cyclohexa-2,5-diene-1,4-dione (**4g**)

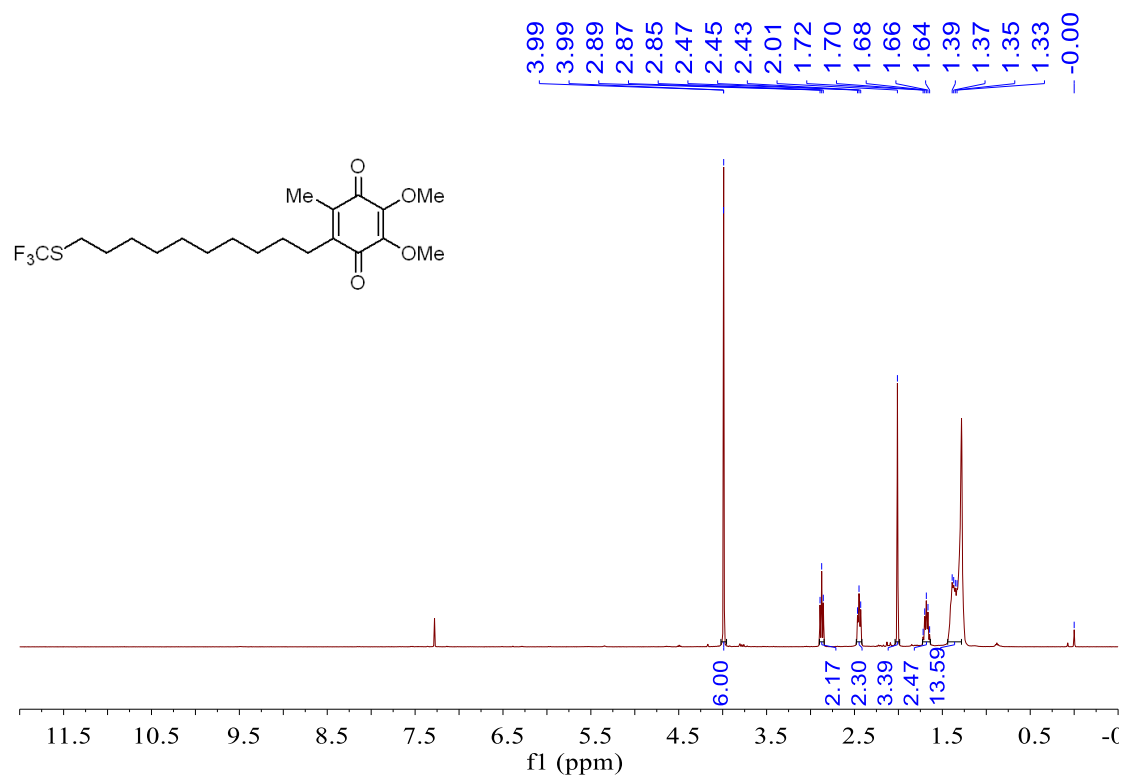

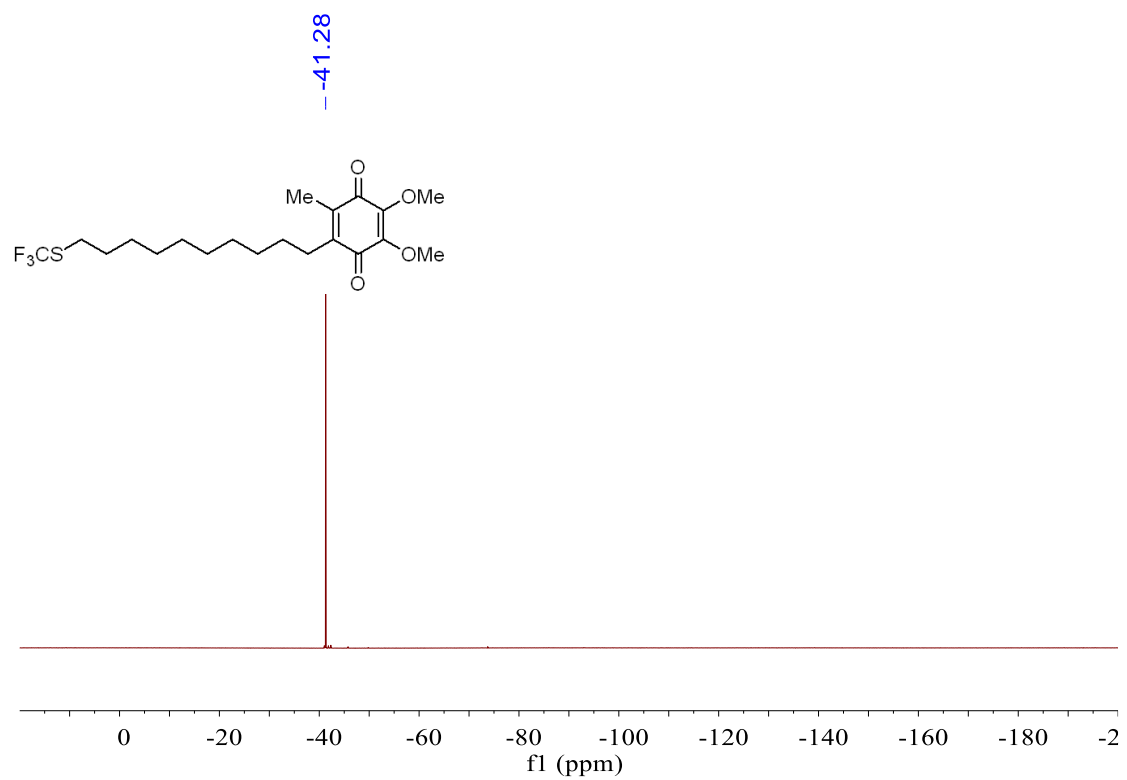

*((6,6-dimethylbicyclo[3.1.1]hept-2-en-2-yl)methyl)(trifluoromethyl)sulfane (4h)*

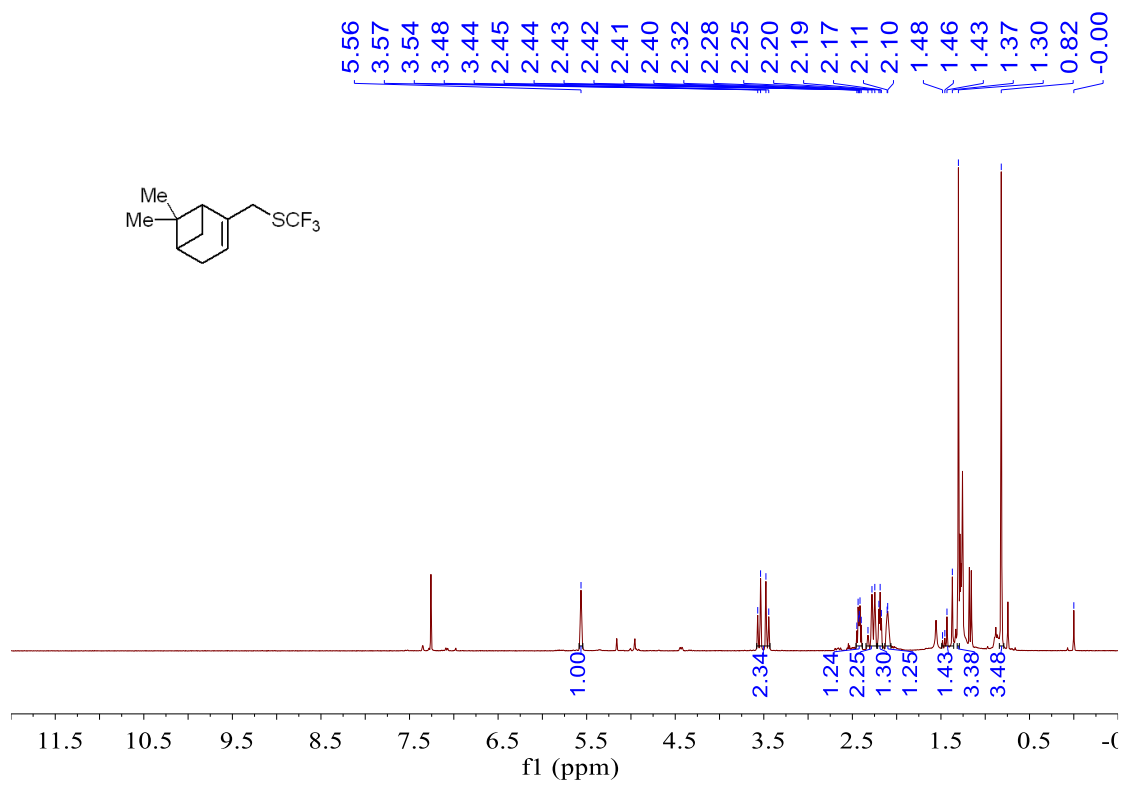

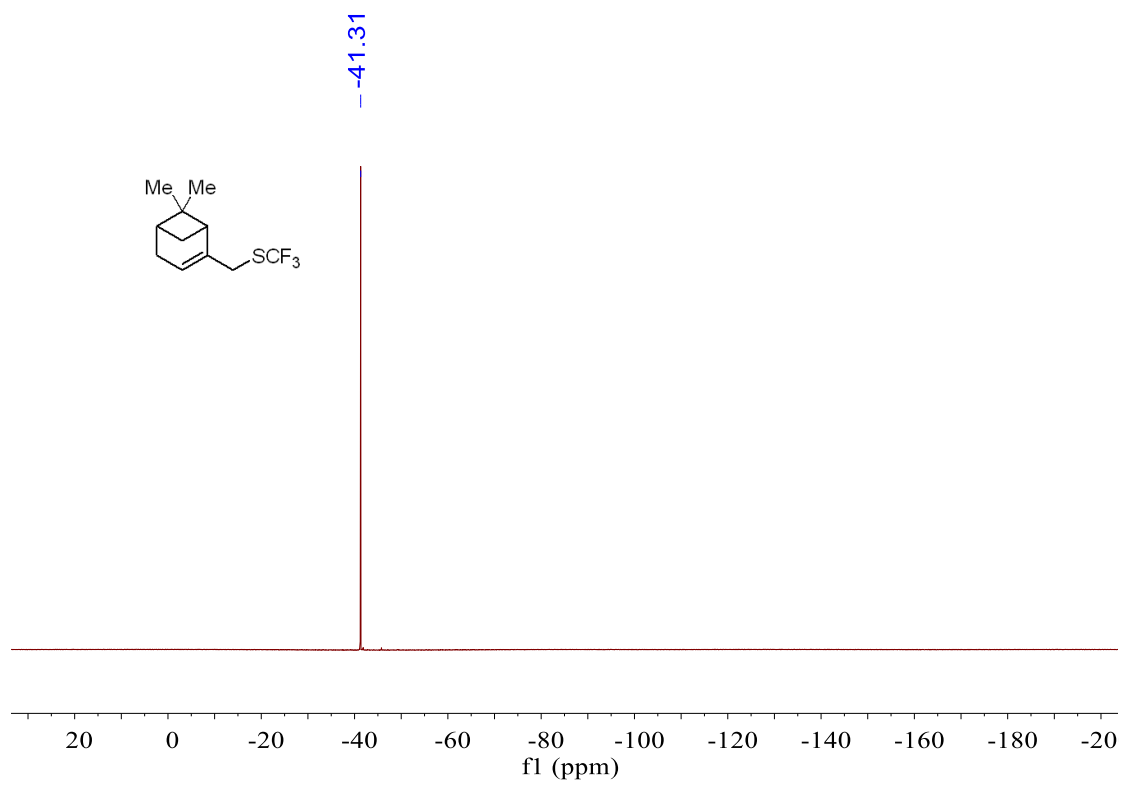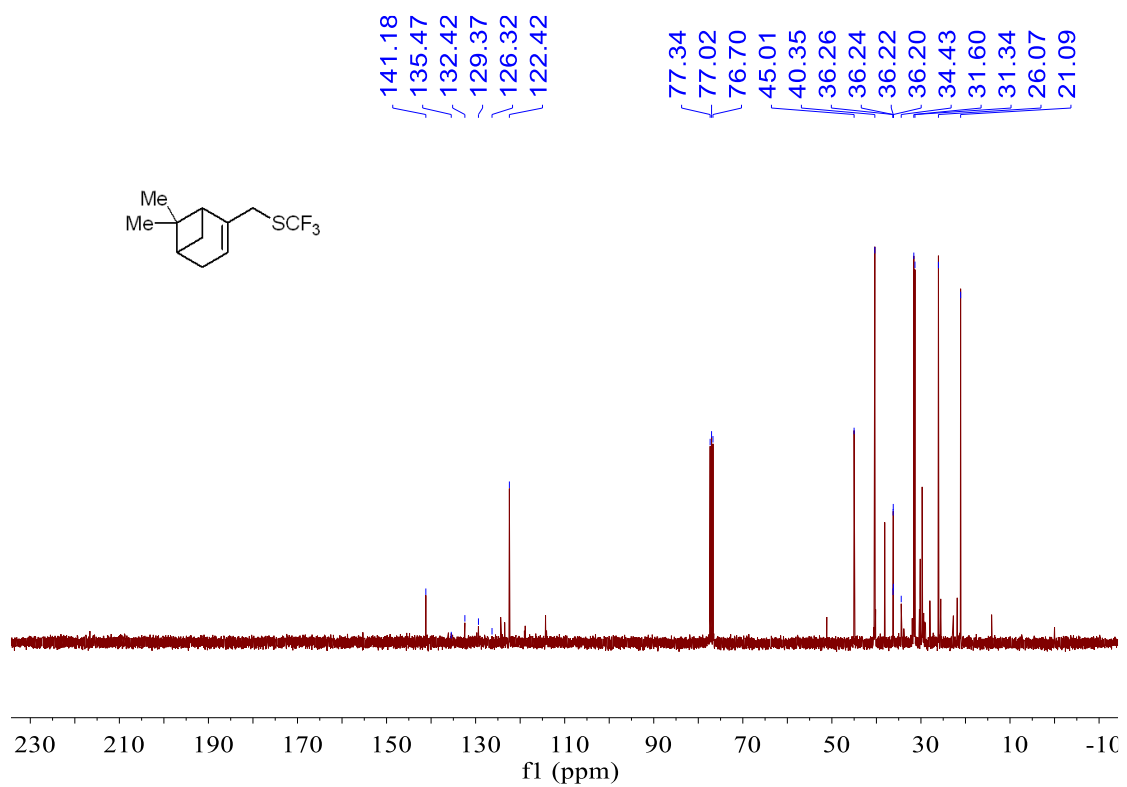

(3,7-dimethyloctyl)(trifluoromethyl)sulfane (**4i**)

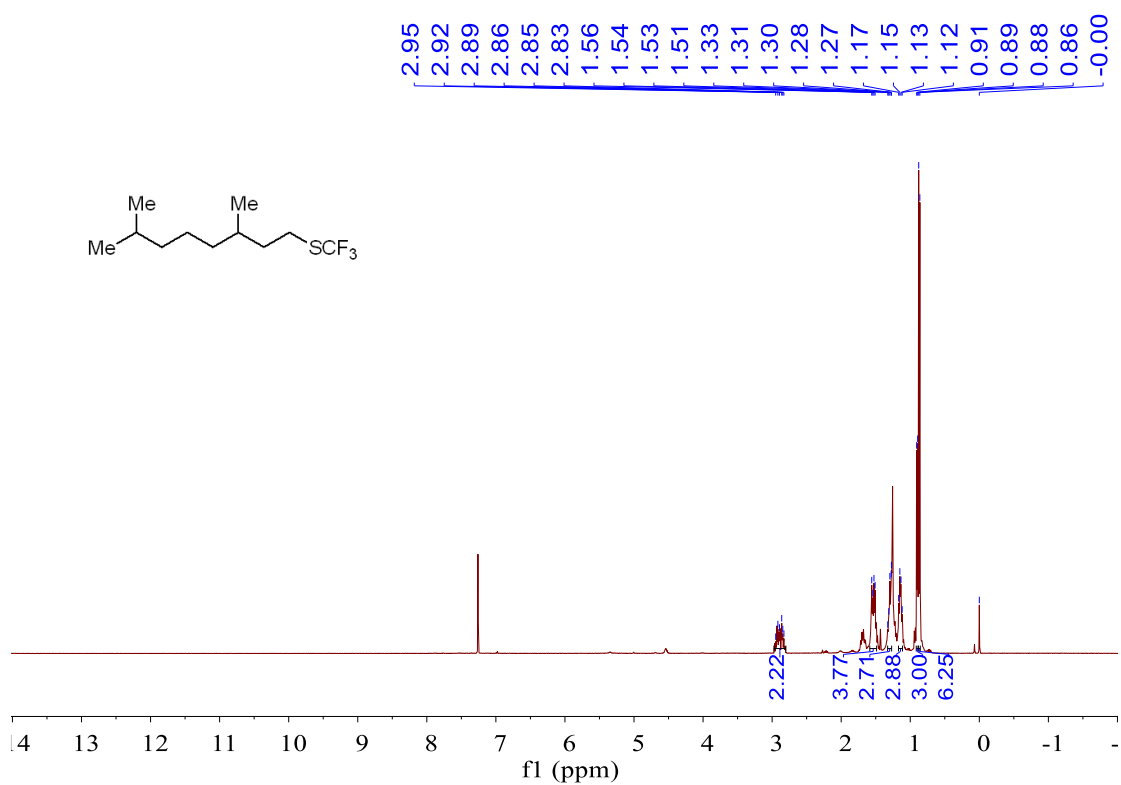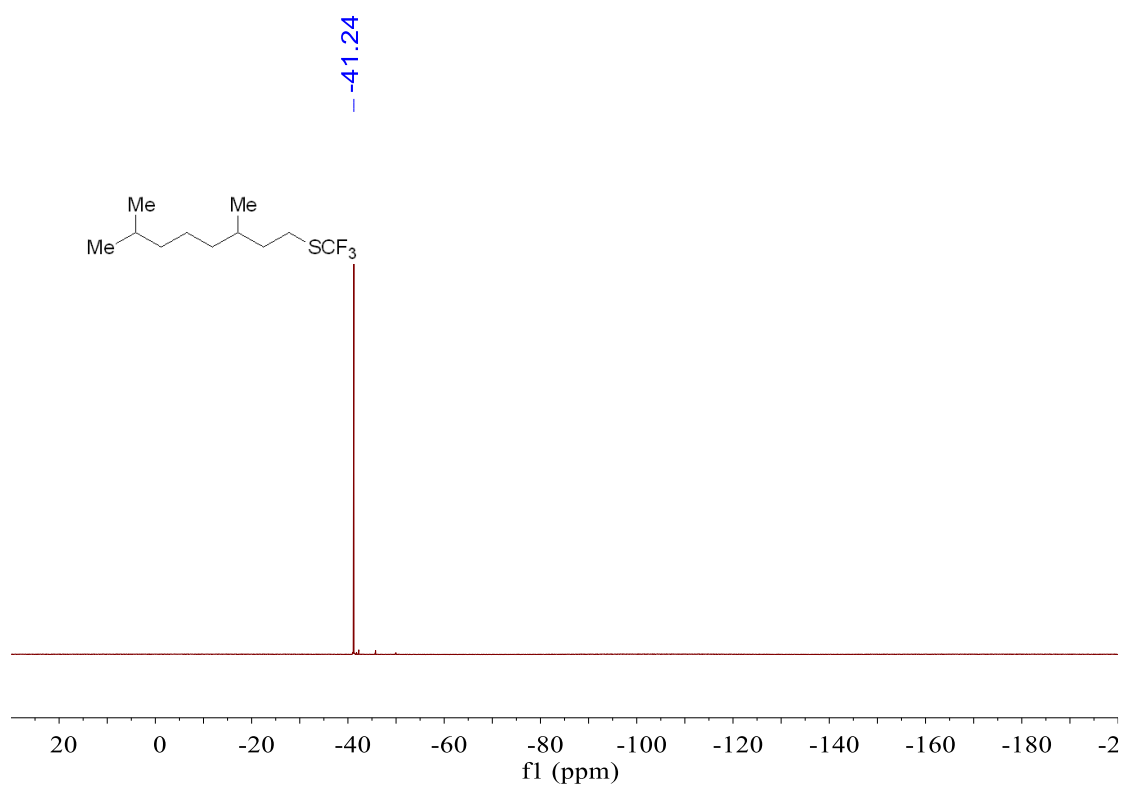

(3,7-dimethyloct-6-en-1-yl)(trifluoromethyl)sulfane (**4j**)

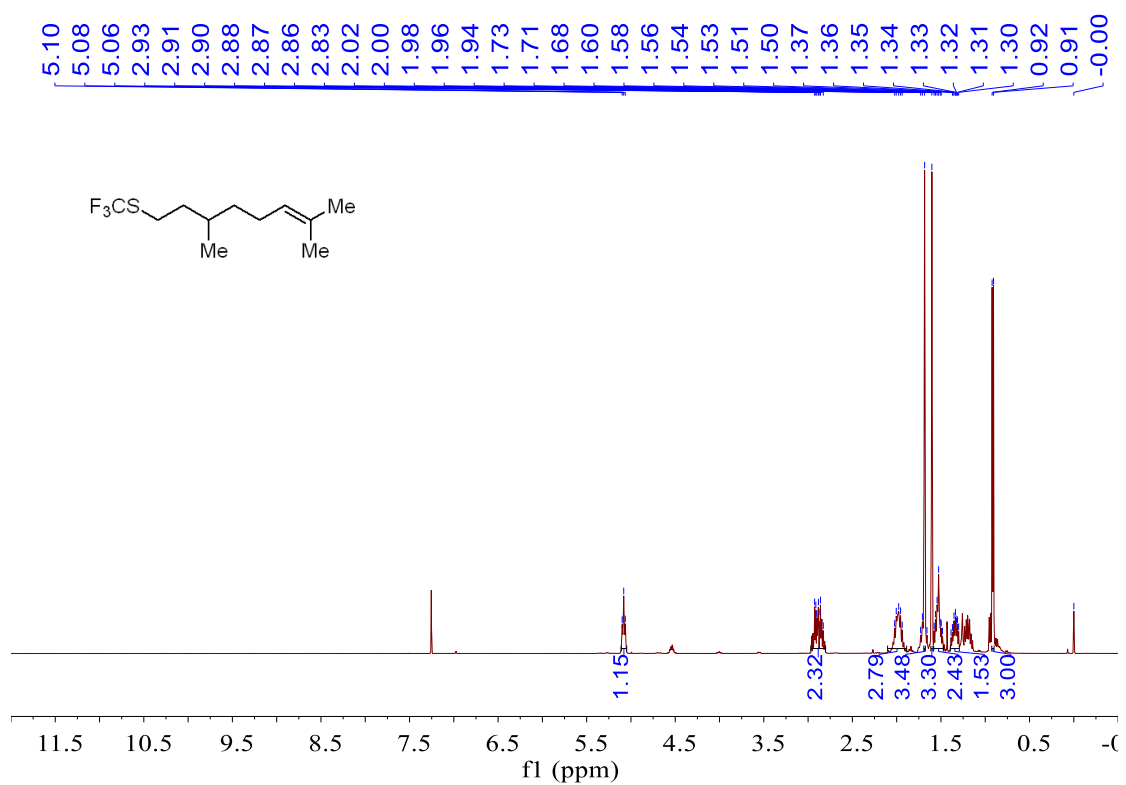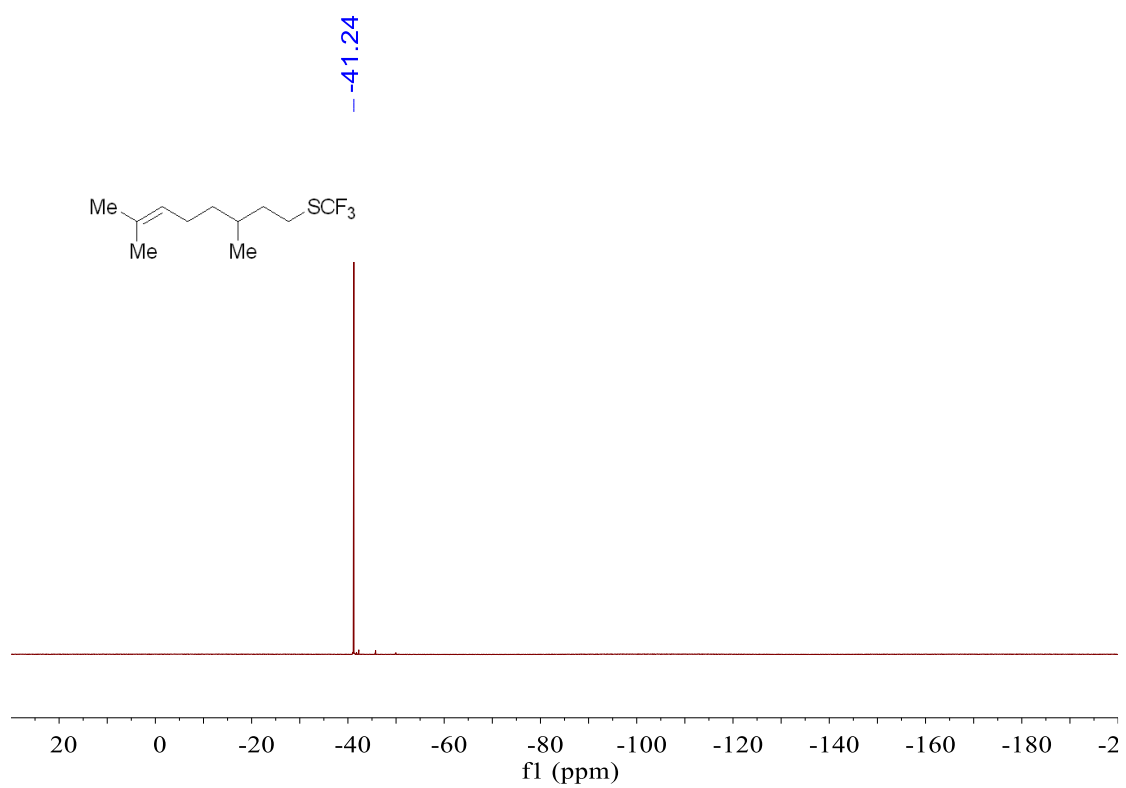

*((9Z,12Z)-octadeca-9,12-dien-1-yl)(trifluoromethyl)sulfane (4k)*

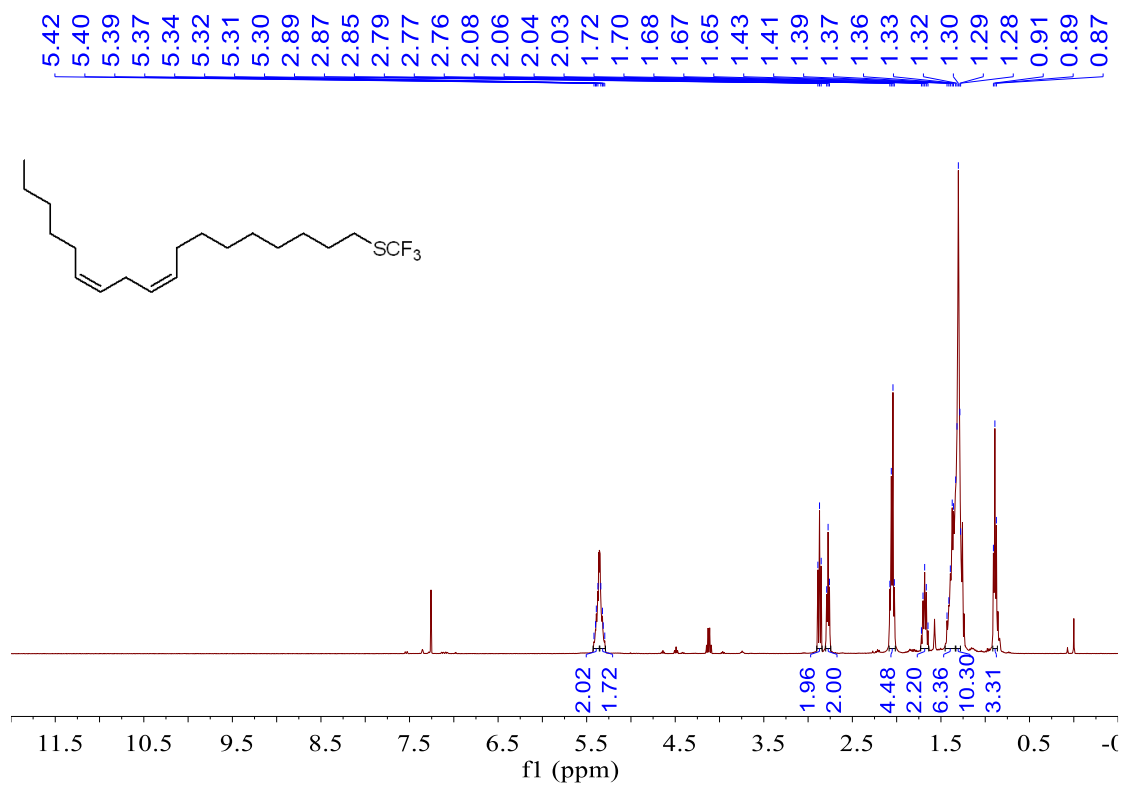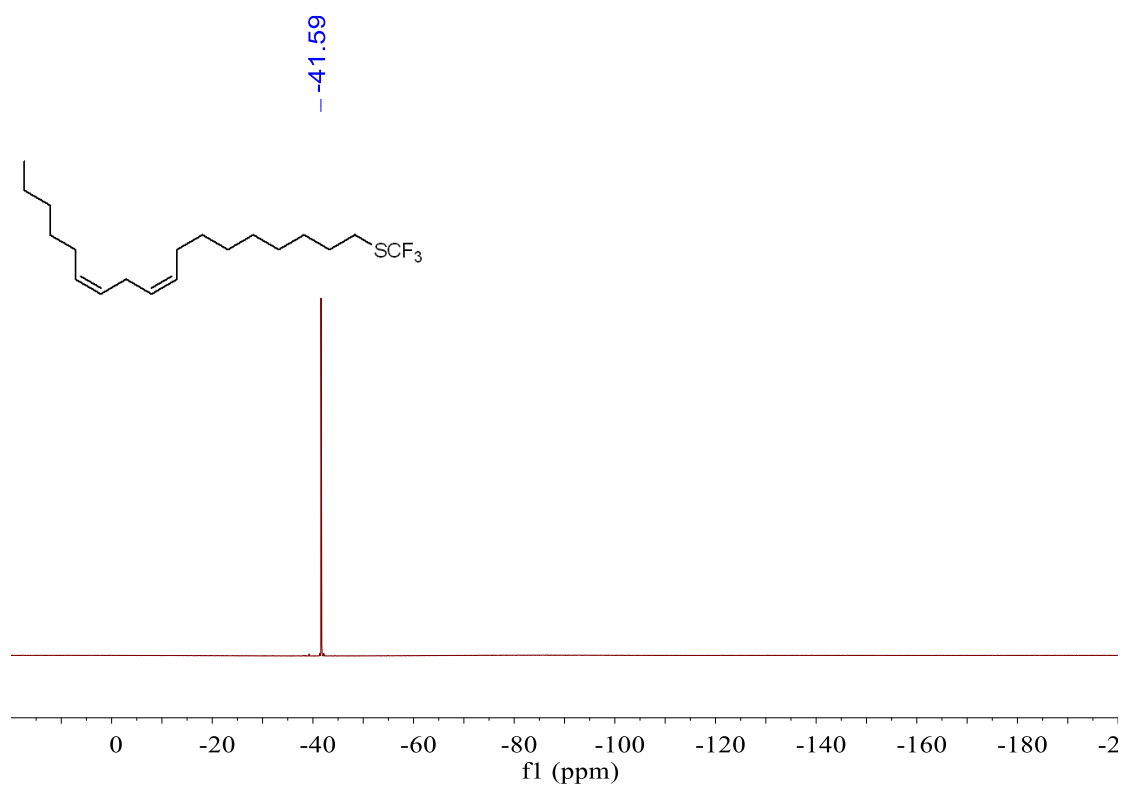

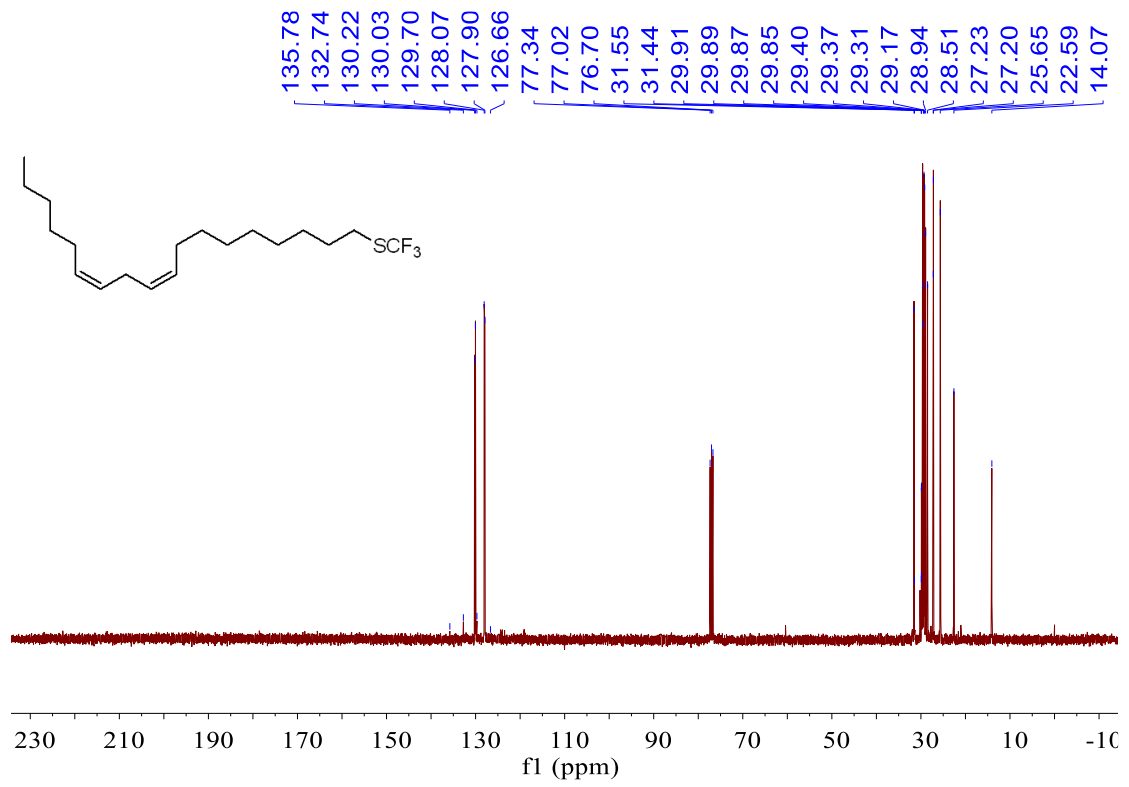

Supplement: d3ob01535a1.pdf [file d3ob01535a1.pdf]
